# Supplementary material
Source: publisher figshare collection journal article supplement (https://acs.figshare.com/ndownloader/files/8701939)

## Supporting Information

# **Direct Reductive Quinolyl $\beta$ -C-H Alkylation by Multi-Spherical Cavity Carbon-Supported Cobalt Oxide Nanocatalysts**

Feng Xie, Rong Xie, Jia-Xi Zhang, Huan-Feng Jiang, li Du\*, Min Zhang\*

School of Chemistry and Chemical Engineering, South China University of Technology,

Guangzhou 510641, P. R. China

duli@scut.edu.cn; minzhang@scut.edu.cn

## Table of Contents

|                                                                           |       |
|---------------------------------------------------------------------------|-------|
| 1. General Information                                                    | 3     |
| 2. General Procedure for the Preparation of CoO <sub>x</sub> /MSCC.       | 4     |
| 3. Characterization of CoO <sub>x</sub> /MSCC                             | 5-7   |
| 3.1. XRD Measurements and Data of CoO <sub>x</sub> /MSCC                  |       |
| 3.2. BET and Pore Diameter Measurements of CoO <sub>x</sub> /MSCC         |       |
| 3.3. TEM and EDXS Maps of Image of CoO <sub>x</sub> /MSCC                 |       |
| 4. Experimental Procedure                                                 | 8-12  |
| 4.1. Optimization of Reaction Conditions for the Benzylation of Quinoline |       |
| 4.2. The Time-Concentration Profile of Benzylation of Quinoline           |       |
| 4.3. The Typical Experimental Procedure for the Benzylation of Quinoline  |       |
| 4.4. The Quinolyl β-C-H Alkylation with α,β-Unsaturated Aldehyde          |       |
| 4.5. The Alkylation of 2-Methylquinoline with Aldehyde                    |       |
| 4.6. The Procedure for Synthesis Mixture of Enamine (B1a) and Imine (C1a) |       |
| 4.7. Deuterium-Labelling Experiment                                       |       |
| 4.8. Procedure for Catalyst Recycling                                     |       |
| 4.9. ICP-AES Analysis                                                     |       |
| 5. Analytical Data of the Obtained Compounds                              | 12-19 |
| 6. NMR Spectra of the Obtained Compounds                                  | 20-52 |

## 1. General Information

All the obtained products were characterized by melting points (m.p.),  $^1\text{H}$ -NMR,  $^{13}\text{C}$ -NMR, infrared spectra (IR), and mass spectra (MS), the NMR spectra of the known compounds were found to be identical with the ones reported in the literatures. Additionally, all the new compounds were further characterized by high resolution mass spectra (HRMS). Melting points were measured on an Electrothermal SGW-X4 microscopy digital melting point apparatus and are uncorrected; IR spectra were recorded on a FTLA2000 spectrometer;  $^1\text{H}$ -NMR,  $^{13}\text{C}$ -NMR spectra were obtained on Bruker-400; Mass spectra were recorded on Trace DSQ GC/MS, High-resolution mass spectra (HRMS) were recorded on a JEOL JMS-600 spectrometer. Chemical shifts were reported in parts per million (ppm,  $\delta$ ) downfield from tetramethylsilane. Proton coupling patterns are described as singlet (s), doublet (d), triplet (t), multiplet (m); TLC was performed using commercially prepared 100-400 mesh silica gel plates (GF254), and visualization was effected at 254 nm; All the reagents were purchased from commercial sources (J&KChem, TCI, Fluka, Acros, SCRC), and used without further purification.

XRD was conducted on a TD-3500 powder diffractometer (Tongda, China) operated at 30 kV and 20 mA, using Cu K $\alpha$  radiation sources in a Bragg angle range of 10–80°. Transmission electron microscopy (TEM) images, and selected area electron diffraction (SAED) were acquired from a JEM-2100HR microscope (JEOL, Japan). The Brunauer-Emmett-Teller (BET) surface area was measured by nitrogen adsorption-desorption on a TriStar II 3020 gas adsorption analyzer.

High-angle annular dark field (HAADF) images and energy dispersive spectrometer (EDS) elemental mapping analysis were performed at 200 kV using scanning transmission electron microscopy (STEM) mode on an aberration-corrected JEM-2100F field emission transmission electron microscope.

X-ray photoelectron spectroscopy (XPS) measurement was performed with an ESCALAB 250Xi imaging photoelectron spectrometer (Thermo Fisher Scientific, USA) using a monochromatic Al K $\alpha$  X-ray at a power of 150 W.

## 2. General Procedure for the Preparation of CoO<sub>x</sub>/MSCC

The CoO<sub>x</sub>/MSCC nanoparticles were prepared by an in-situ hard templates method. Firstly, synthesizing spherical SiO<sub>2</sub> template, then the synthesis of PVP bridged Co-PA (PA: polyaniline) co-coated SiO<sub>2</sub> nanospheres. Finally, pyrolyzing the precursors and reasonably removing the SiO<sub>2</sub> template.

### The synthesis of SiO<sub>2</sub> nanospheres

The SiO<sub>2</sub> nanospheres were synthesized according to the reported work.<sup>1</sup> In brief, 82 mg *L*-arginine was dissolved into the mixture of 62 mL deionized water, then added 4 mL cyclohexane. After the solution was heated to 60 °C, 4.9 mL TEOS was dropwise added to the above mixture and kept stirring at 60 °C for 20 h to make the SiO<sub>2</sub> seeds grew into spherical particle. To control the different cavity size of SiO<sub>2</sub> nanospheres, the secondary growth was necessary. Specifically, 216 ml deionized water and 30ml cyclohexane were added to the mother liquor, 21mL TEOS was dropwise added to the above mixture and kept stirring at 60 °C for 30 h, finally SiO<sub>2</sub> nanospheres were obtained.

### The synthesis of PVP bridged Co-PA/SiO<sub>2</sub>

Furthermore, 1.12g PVP-k30 (polyvinylpyrrolidone) was dissolved into 40 mL SiO<sub>2</sub> nanosphere solution and stirred for 2 hours to coat on SiO<sub>2</sub>. Moreover, Co(OAc)<sub>2</sub>•4H<sub>2</sub>O (352.0 mg, 1.4 mmol) was stirred in ethanol (100 mL) for approximately 20 min at room temperature until dissolved. Then the 40ml SiO<sub>2</sub> nanosphere solution was dropwise added to the above mixture, the whole reaction mixture was stirred at 80 °C for 4 h, then kept stirring at room temperature overnight. After that, 2.62 mL concentrated HCl solution (12 M) and 2.05 mL aniline were poured into the above mixture and kept stirring. Subsequently, 21 mL diluted HCl solution (0.75 M) which had dissolved 5.13 g ammonium persulfate, was dropwise added to the above solution, and then kept stirring under ice bath for 24 hours. After vaporizing the solvent at 90 °C and grinding the remained bottle-green bulk, the PVP bridged Co-PA/SiO<sub>2</sub> ((PA: polyaniline)) composite powder was obtained.

### Pyrolyzing the precursors and removing the SiO<sub>2</sub> template

Subsequently, the Co-PA/SiO<sub>2</sub> composite was pyrolyzed under argon at 800 °C for 2 hour. Finally, the SiO<sub>2</sub> templates were reasonably removing by 2 M NaOH solution for 12 hours at 120 °C, and after filtering, washing and drying, the CoO<sub>x</sub>/MSCC was obtained.

### 3. Characterization of CoO<sub>x</sub>/MSCC

#### 3.1. XRD Measurements and Data of CoO<sub>x</sub>/MSCC

The XRD pattern of the CoO<sub>x</sub>/MSCC just presents weak (less obvious) peaks ascribed to metal cobalt or its related compounds, indicating that the cobalt species in the catalyst are highly dispersed or amorphous. The presence of metallic cobalt is confirmed by the characteristic peaks at  $2\theta = 44.21^\circ$ ,  $51.52^\circ$ . Moreover, XRD spectrum of catalyst reused for five runs does not show much difference compared to the fresh catalyst. It means that structure of cobalt catalyst maintains very well after five consecutive runs.

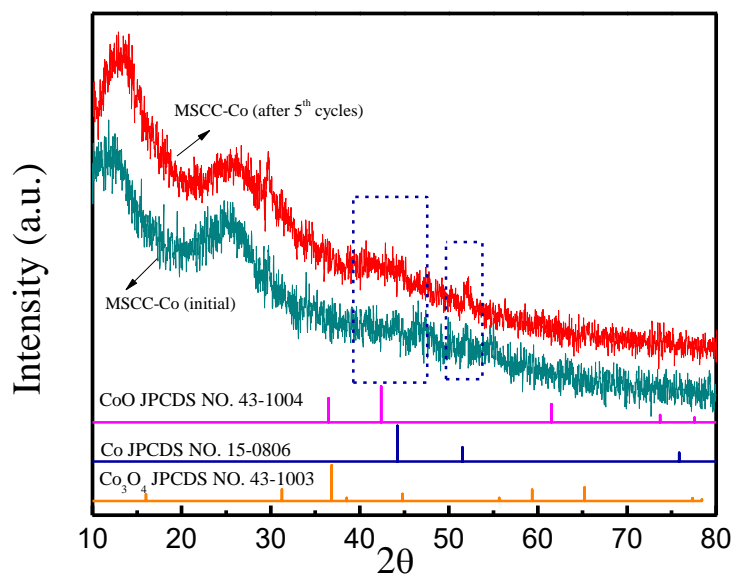

Figure S1. XRD Spectrum of CoO<sub>x</sub>/MSCC Catalyst.

#### 3.2 BET and Pore Diameter Measurements of CoO<sub>x</sub>/MSCC

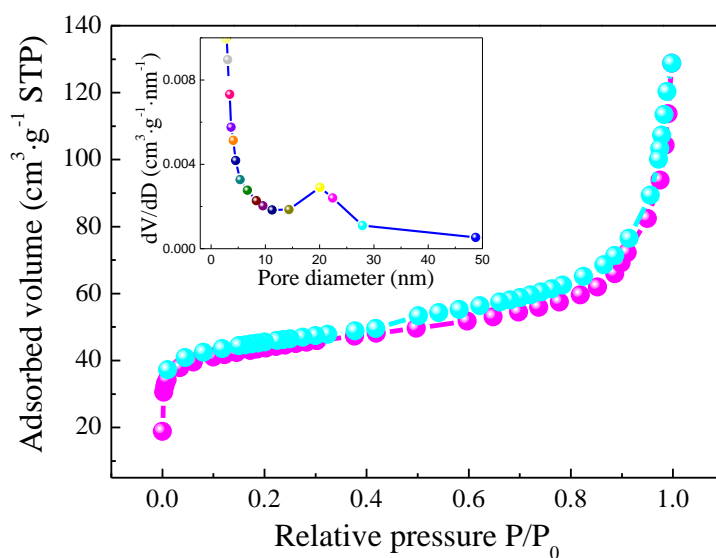

Figure S2. The adsorption-desorption curves and pore diameter distribution of CoO<sub>x</sub>/MSCC

### 3.3 TEM and EDXS Maps of Image of CoO<sub>x</sub>/MSCC

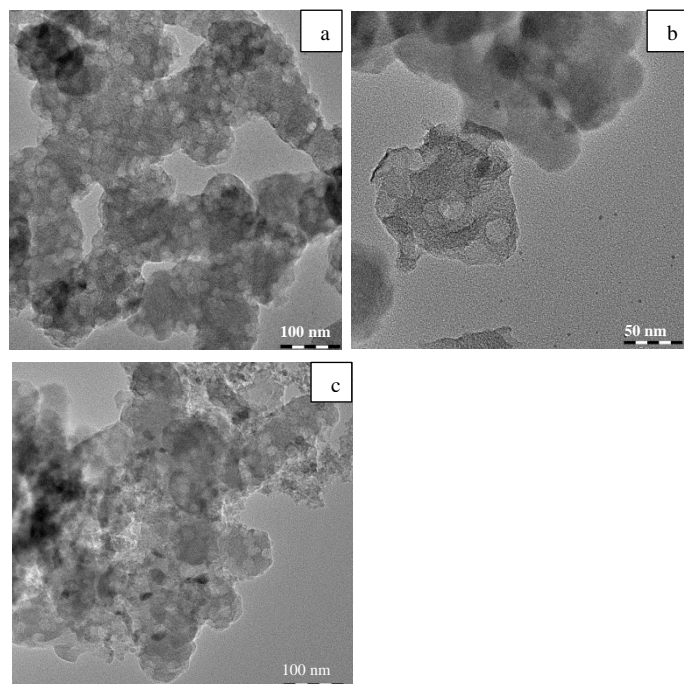

**Figure S3.** (a-b) TEM images of fresh CoO<sub>x</sub>/MSCC, (c) TEM images of reused for five runs.

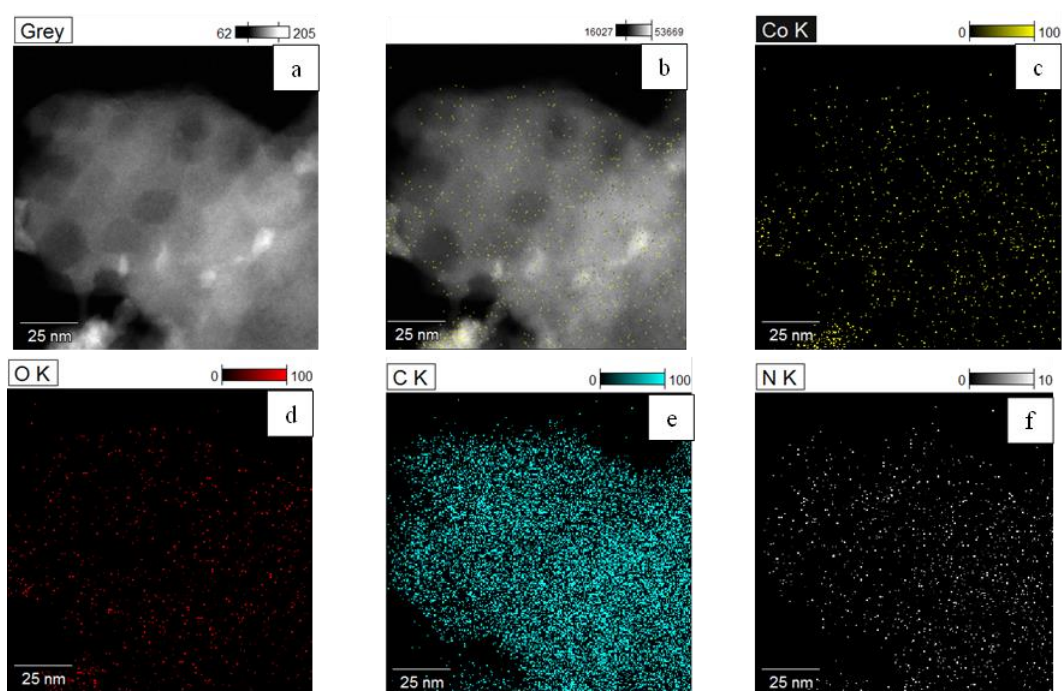

**Figure S4.** (a) HAADF-STEM image of CoO<sub>x</sub>/MSCC. EDS elemental maps for combined image (b), Co (c), O (d), C (e), N (f).

### 3.4. XPS Spectra of CoO<sub>x</sub>/MSCC

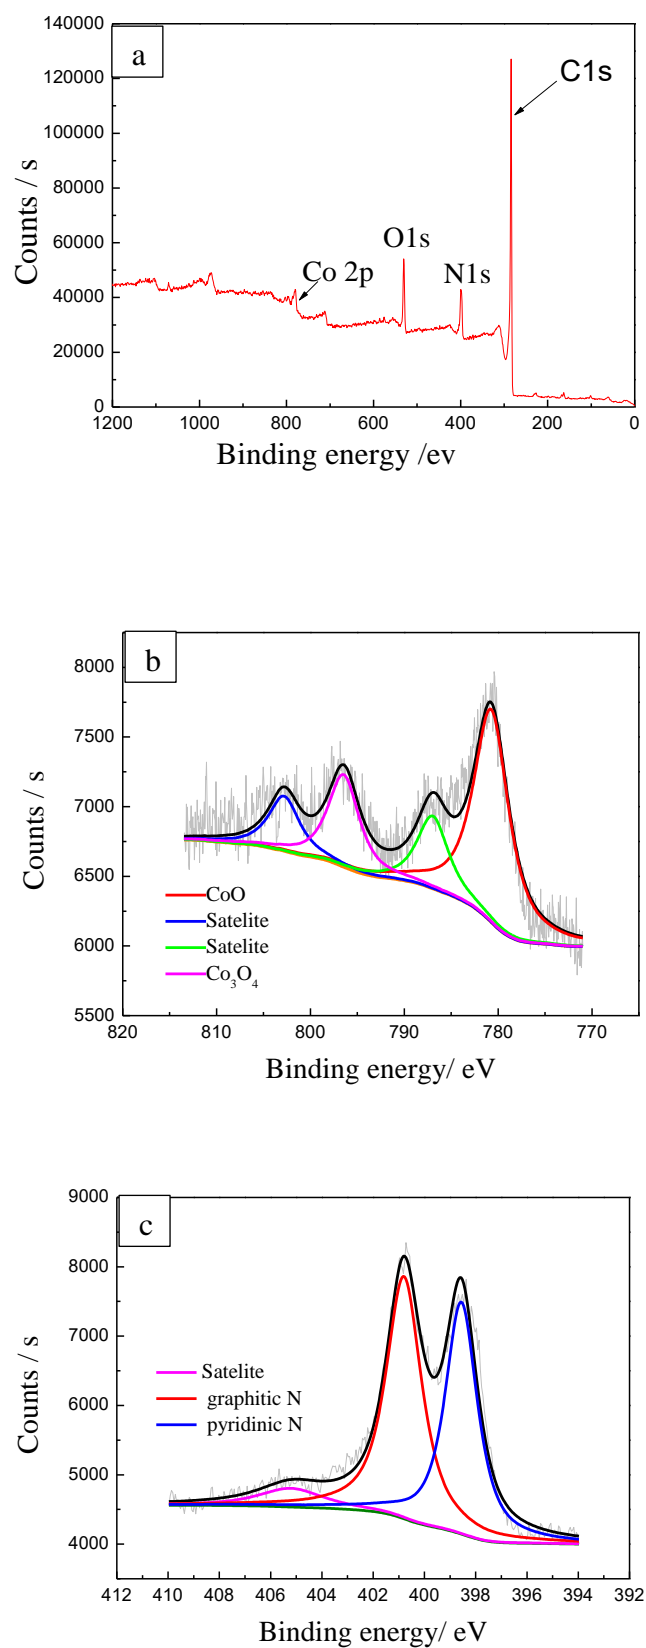

**Figure S5.** (a) XPS spectra for CoO<sub>x</sub>/MSCC, (b) Co 2p and (c) N 1s XPS spectra.

## 4. Experimental Procedure

4.1 Table S1. Optimization of Reaction Conditions for the Benzylation of Quinoline<sup>a</sup>

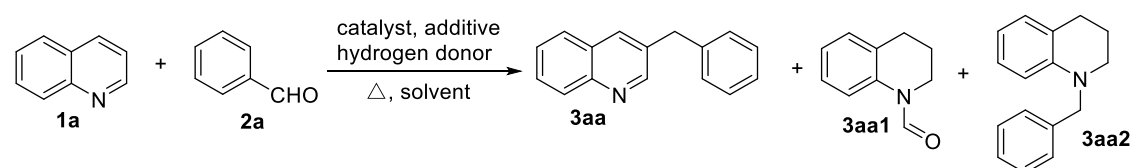

| Entry | Catalyst               | Additive             | <b>3aa</b><br>Yield % <sup>b</sup> | <b>3aa1</b><br>Yield % <sup>b</sup> | <b>3aa2</b><br>Yield % <sup>b</sup> |
|-------|------------------------|----------------------|------------------------------------|-------------------------------------|-------------------------------------|
| 1     | CoO <sub>x</sub> /MSCC | -                    | 14                                 | 2                                   | 0                                   |
| 2     | CoO <sub>x</sub> /MSCC | benzoic acid         | 25                                 | 2                                   | 0                                   |
| 3     | -                      | benzoic acid         | 0                                  | 0                                   | 0                                   |
| 4     | CoO <sub>x</sub> /MSCC | benzoic acid         | 0 <sup>c</sup>                     | 0 <sup>c</sup>                      | 0 <sup>c</sup>                      |
| 5     | MSCC                   | benzoic acid         | 0                                  | 0                                   | 0                                   |
| 6     | CoO <sub>x</sub> /MSCC | benzoic acid         | 0 <sup>d</sup>                     | 0 <sup>d</sup>                      | 0 <sup>d</sup>                      |
| 7     | Co(OAc) <sub>2</sub>   | benzoic acid         | 0                                  | 0                                   | 0                                   |
| 8     | CoO <sub>x</sub> /MSCC | PivOH                | 33                                 | 3                                   | 0                                   |
| 9     | CoO <sub>x</sub> /MSCC | <i>P</i> -TSA        | 27                                 | 2                                   | 0                                   |
| 10    | CoO <sub>x</sub> /MSCC | Yb(OTf) <sub>3</sub> | 38                                 | 2                                   | 0                                   |
| 11    | CoO <sub>x</sub> /MSCC | CF <sub>3</sub> COOH | 53                                 | 3                                   | 0                                   |
| 12    | CoO <sub>x</sub> /MSCC | CF <sub>3</sub> COOH | (42, 0, 21) <sup>e</sup>           | (4, 0, 1) <sup>e</sup>              | (0, 0, 0) <sup>e</sup>              |
| 13    | CoO <sub>x</sub> /MSCC | CF <sub>3</sub> COOH | (18, 7, 16, 25) <sup>f</sup>       | (0, 0, 0, 0) <sup>f</sup>           | (0, 0, 0, 0) <sup>f</sup>           |
| 14    | CoO <sub>x</sub> /MSCC | CF <sub>3</sub> COOH | (58, 60, 60) <sup>g</sup>          | (3, 4, 3) <sup>g</sup>              | (0, 0, 0) <sup>g</sup>              |
| 15    | CoO <sub>x</sub> /MSCC | CF <sub>3</sub> COOH | (68, 73, 72) <sup>h</sup>          | (5, 6, 4) <sup>h</sup>              | (0, 0, 1) <sup>h</sup>              |
| 16    | CoO <sub>x</sub> /MSCC | CF <sub>3</sub> COOH | 78 <sup>i</sup>                    | 4 <sup>i</sup>                      | 0 <sup>i</sup>                      |
| 17    | CoO <sub>x</sub> /MSCC | CF <sub>3</sub> COOH | 82 <sup>j</sup>                    | 5 <sup>j</sup>                      | 0 <sup>j</sup>                      |
| 18    | CoO <sub>x</sub> /MSCC | CF <sub>3</sub> COOH | (21, 76, 81) <sup>k</sup>          | (0, 3, 7) <sup>k</sup>              | (0, 0, 0) <sup>k</sup>              |
| 19    | CoO <sub>x</sub> /MSCC | CF <sub>3</sub> COOH | (67, 79) <sup>l</sup>              | (2, 4) <sup>l</sup>                 | (0, 0) <sup>l</sup>                 |
| 20    | CoO <sub>x</sub> /MSCC | CF <sub>3</sub> COOH | (79, 68) <sup>m</sup>              | (4, 2) <sup>m</sup>                 | (0, 0) <sup>m</sup>                 |
| 21    | CoO <sub>x</sub> /MSCC | CF <sub>3</sub> COOH | 0 <sup>n</sup>                     | 85 <sup>n</sup>                     | 0 <sup>n</sup>                      |

<sup>a</sup> Unless otherwise stated, all reactions were performed at 120 °C for 16 h under N<sub>2</sub> protection by using **1a** (0.75 mmol), **2a** (1.5 eq, 1.13 mmol), catalyst (5 mol %, 55 mg), *p*-xylene (1.5 mL), HCO<sub>2</sub>H (3.5 eq, 2.63 mmol), additive (0.4 eq, 0.3 mmol), temperature (120 °C), CoO<sub>x</sub>/MSCC pyrolyzed at 800 °C. <sup>b</sup> GC yield using hexadecane as an internal standard. <sup>c</sup> Without HCO<sub>2</sub>H. <sup>d</sup> Non-pyrolyzed CoO<sub>x</sub>/MSCC. <sup>e</sup> Yields with respect to chlorobenzene, DMSO and *t*-amyl alcohol as the solvents, respectively. <sup>f</sup> the hydrogen sources are respect to borane-tetrahydrofuran complex (BF<sub>3</sub>-THF), HCOONa, HCOONH<sub>4</sub> and hydrogen balloon (1atm). <sup>g</sup> Yields with respect to use of 0.45, 0.6 and 0.75 mmol of CF<sub>3</sub>CO<sub>2</sub>H, respectively. <sup>h</sup> Yields with respect to use of 3.38, 3.75 and 4.13 mmol of HCO<sub>2</sub>H along with additive CF<sub>3</sub>COOH (0.6 mmol), respectively. <sup>i</sup> Temperature: 130 °C, additive CF<sub>3</sub>COOH (0.6 mmol), HCO<sub>2</sub>H (3.75 mmol). <sup>j</sup> Temperature: 130 °C, time: 20 h, additive CF<sub>3</sub>COOH (0.6 mmol), HCO<sub>2</sub>H (3.75 mmol). <sup>k</sup> Reaction temperature: 130 °C, time: 20 h, additive CF<sub>3</sub>COOH (0.6 mmol), HCO<sub>2</sub>H (3.75 mmol), the amount of catalyst are with respect to 1 mol % (11 mg), 4 mol % (45 mg), 6 mol % (65 mg). <sup>l</sup> Reaction temperature: 130 °C, time: 20 h, additive CF<sub>3</sub>COOH (0.6 mmol), HCO<sub>2</sub>H (3.75 mmol), the Co content of catalyst are with respect to 2.8 wt %, 6.2 wt %. <sup>m</sup> CoO<sub>x</sub>/MSCC pyrolyzed at 700 °C, 900 °C, respectively, reaction temperature: 130 °C, time: 20 h, additive CF<sub>3</sub>COOH (0.6 mmol), HCO<sub>2</sub>H (3.75 mmol). <sup>n</sup> Without **2a**, reaction temperature: 130 °C, time: 20 h, additive CF<sub>3</sub>COOH (0.6 mmol), HCO<sub>2</sub>H (3.75 mmol).

To test the catalytic performance of the prepared CoO<sub>x</sub>/MSCC material, we chose the coupling of quinoline **1a** and benzaldehyde **2a** as a model reaction to evaluate different reaction parameters. Initially, the reaction in *p*-xylene was performed at 120 °C for 16 h in the presence of 5 mol% of catalyst and 3.5 equivalents of formic acid as the hydrogen donor. To our delight, the desired 3-alkyl quinoline **3aa** was detected in 14 % yield along with 2% of N-formylated tetrahydronquinoline (Table S1, entry 1). And the addition of benzoic acid significantly improved the product yield to 25% (entry 2). However, the absence of catalyst or HCO<sub>2</sub>H (entries 3-4) failed to



give any product, indicating that both of which are crucial in affording the products. The use of MSCC material or non-pyrolyzed  $\text{CoO}_x/\text{MSCC}$  or catalyst precursor  $\text{Co}(\text{OAc})_2$  showed no activity (entries 5-7). Then, a series of acidic additives (entries 8-11), solvents (entry 12) and hydrogen donors (entry 13) were screened, the results indicated that  $\text{CF}_3\text{CO}_2\text{H}$  (TFA), *p*-xylene and formic acid constitute the best combination. Further, both increases of additive (entry 14) and hydrogen donor (entry 15) loadings resulted in incremental product yields, and 0.8 equiv of  $\text{CF}_3\text{CO}_2\text{H}$  (0.6 mmol) along with 5 equiv of  $\text{HCO}_2\text{H}$  (3.75 mmol) showed to be the best choice. The temperature and time screenings (entries 16-17) indicated that 130 °C and 20 h are the preferred parameters to give a highest product yield (82%) with high chemo-selectivity, while both change of catalyst loadings or contents (entries 18-19) were not fruitful since no increase of product yields was obtained. Noteworthy, the catalysts pyrolyzed at 700 °C and 900 °C afforded lower yields as compared with the one pyrolyzed at 800 °C (entry 20), and the absence of aldehyde **2a** only gave the N-formylated product **3aa1** (entry 21). Hence, the optimal conditions are as described in entry 17.

**Scheme S1. Substrates Employed for Synthesizing 3-Aryl Quinoline Derivatives**

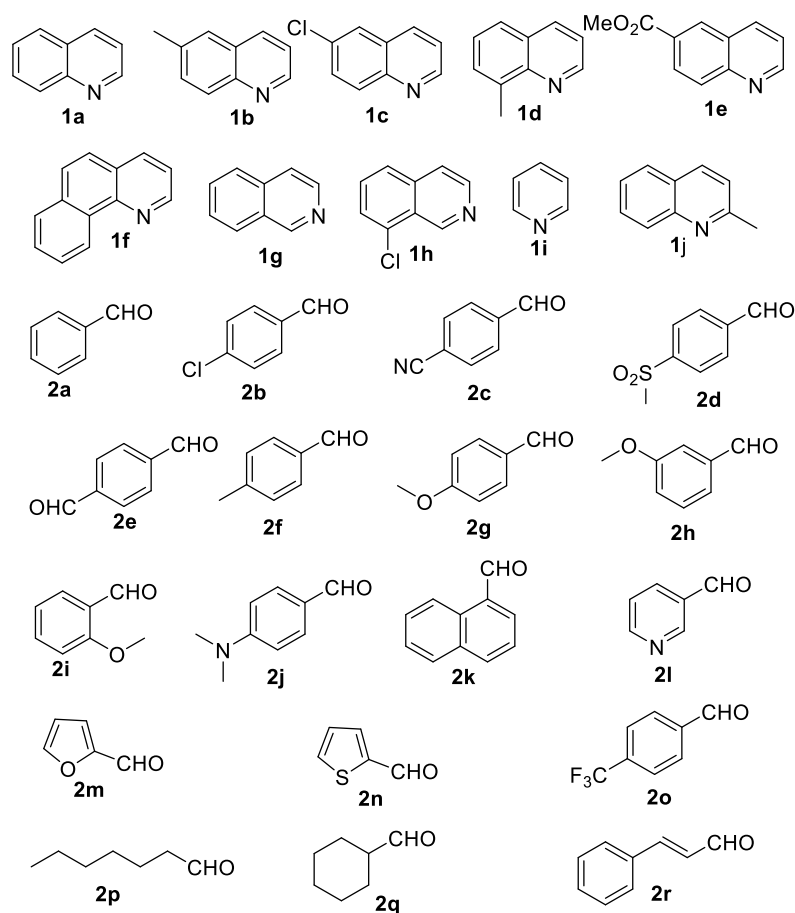

#### 4.2. The Time-Concentration Profile of Benzylation of Quinoline

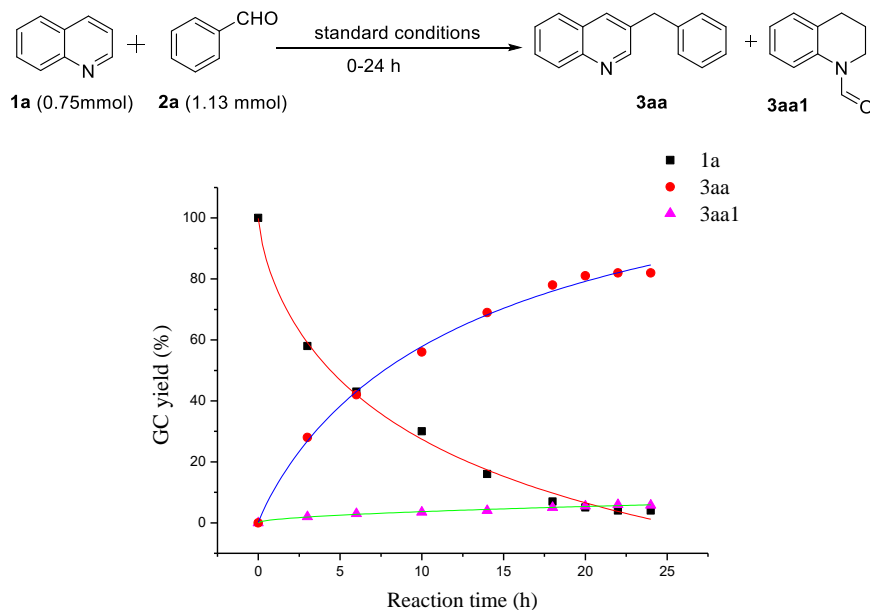

Figure S6. Representative time course of the model reaction

#### 4.3. The Typical Experimental Procedure for the Benzylation of Quinoline

Under nitrogen atmosphere, CoO<sub>x</sub>/MSCC (55 mg, 5 mol%), CF<sub>3</sub>COOH (68 mg, 0.6 mmol), HCOOH (172 mg, 3.75 mmol), quinoline (**1a**; 97 mg, 0.75 mmol), benzaldehyde (**2a**; 119 mg, 1.13 mmol) and *p*-xylene (1.5 mL) were added successively to a Schlenk tube (50 mL) equipped with a magnetic stirrer bar, the Schlenk tube was then closed and the resulting reaction mixture was heated at 130 °C for 20 h. After cooling to room temperature, the resulting mixture was washed with 10% Na<sub>2</sub>CO<sub>3</sub> solution, and then extracted with ethyl acetate, the combined organic layers were dried with anhydrous Na<sub>2</sub>SO<sub>4</sub>, and concentrated under vacuum. The residue was directly purified by preparative TLC on silica, eluting with petroleum ether (60-90°C): ethyl acetate (15 : 1) to give 3-benzylquinoline (**3aa**) as a yellow liquid (108 mg, 70%).

#### 4.4. The Quinolyl β-C-H Alkylation with α,β-Unsaturated Aldehyde

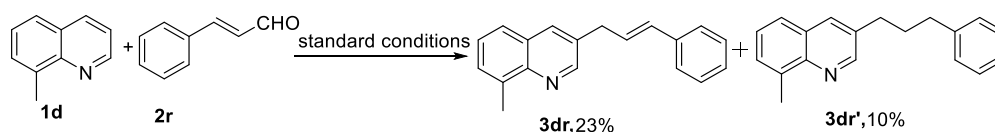

The coupling of 8-methylquinoline **1d** with cinnamyl aldehyde **2r** was conducted to evaluate if the α,β-unsaturated aldehyde is also applicable for the catalyst system. Upon GC-MS analysis, we observed product **3dr** and the corresponding reduced product (**3dr'**) in 23%, 10% yields, respectively. Similarly, when replacing **2r** with citral and citronellal as the substrates, only trace of the target products and the corresponding reduced products were observed.

#### 4.5. The Alkylation of 2-Methylquinoline with Aldehyde

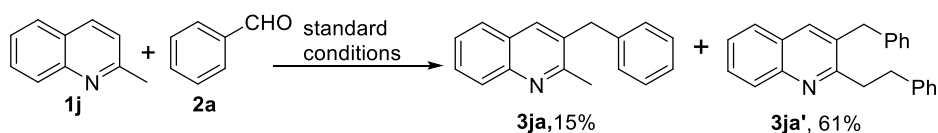

The coupling reaction of 2-methylquinoline **1j** with benzaldehyde **2a** was performed under standard conditions. The mono-alkylated product **3ja** and 2,3-dialkylated product **3ja'** were acquired in 15%, 61% yields, respectively, indicating that the mono-hydrogen transfer is able to generate two enamine intermediates with two reactive beta-sites.

#### 4.6. The Procedure for Synthesis Mixture of Enamine (**B1a**) and Imine (**C1a**)

The mixture of 1,2,3,4-tetrahydroquinolines (0.75 mmol), pyridine (1.5 mmol), 20 mol% TEMPO (2,2,6,6-Tetramethylpiperidine 1-oxyl) and 20 mol% CuCl in *p*-xylene (1.5 ml) was stirred at 40 °C for 2 hours under 1 atm of O<sub>2</sub> atmosphere (using O<sub>2</sub> balloon). After cooling down to room temperature, the reaction mixture was filtrated to afford the clear liquid, which contained the mixture of enamine (**B1a**) and imine (**C1a**). Upon GC–MS analysis, the ratio of **B1a** to **C1a** is 6:1.

#### 4.7 Deuterium-Labeling Experiment

By replacing HCO<sub>2</sub>H with DCO<sub>2</sub>D in the standard conditions, the reaction of 8-methylquinoline (**1d**) with 4-chlorobenzaldehyde (**2b**) gave product **3db-dn** in 57% yield with different deuterium ratios at position -2, -4 and the benzylic site, showing that the hydrogen from formic acid is transferred to the pyridyl nucleus of quinoline, which is in good agreement with the reaction pathway proposed in **Scheme 2** of the text.

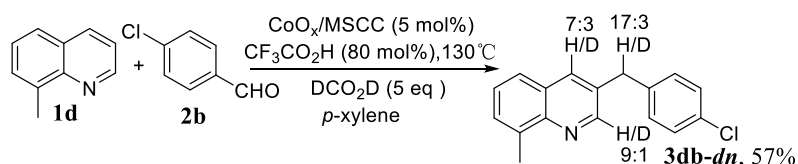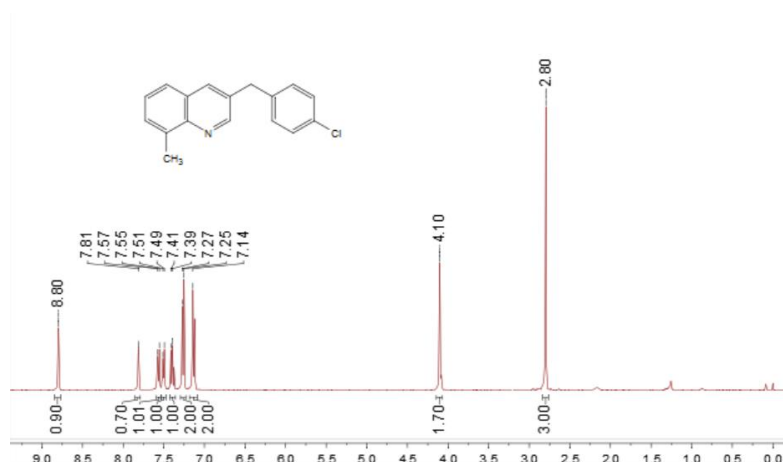

Figure S7. <sup>1</sup>H-NMR spectrum of **3db-dn**

#### 4.8. Procedure for Catalyst Recycling

Under N<sub>2</sub> atmosphere, CoO<sub>x</sub>/MSCC (55 mg), CF<sub>3</sub>COOH (0.6 mmol), HCOOH (3.75 mmol), quinoline (0.75 mmol), benzaldehyde (1.13 mmol) and *p*-xylene (1.5 mL) were added successively to a Schlenk tube (50 mL) equipped with a magnetic stirrer bar, the Schlenk tube was then closed and the resulting reaction mixture was heated at 130 °C for 20 h. After cooling down to room temperature, 50 mg *n*-hexadecane was added to the solution and the yield was determined by GC-MS analysis. The catalyst was isolated by centrifugation, washed with ethyl acetate for three times, then dried under vacuum at 60 °C for 4 h. After that, the catalyst was reused for the next circular reaction.

#### 4.9. ICP-AES Analysis

Table S2. Leaching Experiments

| Run | Cobalt concentration (ICP-AES) |
|-----|--------------------------------|
| 0   | 3.57 ppm                       |
| 1   | 1.54 ppm                       |
| 2   | 0.78 ppm                       |
| 3   | 0.64 ppm                       |
| 4   | 0.51 ppm                       |
| 5   | 0.44 ppm                       |

The ICP-AES analyses for each recycles are summarized in **Table S2** and slight leaching was detected for the reaction media, which is accounted for exfoliation resulted from the mechanical abrasion of the catalytic material during the reaction.

### 5. Analytical Data of the Obtained Compounds

#### 3-benzylquinoline (**3aa**)

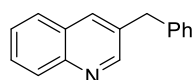

Yellow liquid, <sup>1</sup>H NMR (400 MHz, CDCl<sub>3</sub>): δ 8.81 (d, *J* = 1.6 Hz, 1H), 8.08 (d, *J* = 8.5 Hz, 1H), 7.87 (s, 1H), 7.72 (d, *J* = 8.0 Hz, 1H), 7.68-7.62 (m, 1H), 7.51 (d, *J* = 8.0 Hz, 1H), 7.31 (t, *J* = 7.3 Hz, 2H), 7.23 (t, *J* = 6.9 Hz, 3H), 4.15 (s, 2H); <sup>13</sup>C NMR (101 MHz, CDCl<sub>3</sub>): δ 152.11, 146.92, 139.70, 134.87, 133.87, 129.20, 128.98, 128.87, 128.77, 128.16, 127.47, 126.70, 126.59, 39.27; IR (KBr): 3061, 3027, 1623, 1570, 1378, 786, 715; MS (EI, *m/z*): 219.10 [M]<sup>+</sup>.

#### 3-(4-chlorobenzyl)quinoline (**3ab**)

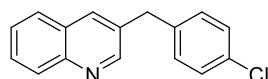

Yellow liquid, <sup>1</sup>H NMR (400 MHz, CDCl<sub>3</sub>): δ 8.79 (t, *J* = 6.9 Hz, 1H), 8.10 (t, *J* = 11.2 Hz, 1H), 7.84 (s, 1H), 7.73 (d, *J* = 8.1 Hz, 1H), 7.66 (t, *J* = 7.5 Hz, 1H), 7.51 (t, *J* = 7.5 Hz, 1H), 7.28 (d, *J* = 8.3 Hz, 2H), 7.14 (d, *J* = 8.2 Hz, 2H), 4.12 (s, 2H); <sup>13</sup>C NMR (101 MHz, CDCl<sub>3</sub>): δ 151.87, 146.96, 138.14, 134.90, 133.30, 132.48, 130.31, 129.20, 129.06, 128.90, 128.08, 127.46, 126.85, 38.56; IR (KBr): 3061, 2925, 1673, 1570, 1089, 1016, 787; MS (EI, *m/z*): 253.16 [M]<sup>+</sup>.

#### 4-(quinolin-3-ylmethyl)benzonitrile (**3ac**)

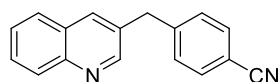

Yellow solid, m.p.: 132-133 °C; <sup>1</sup>H NMR (400 MHz, CDCl<sub>3</sub>): δ 8.77 (d, *J* = 1.7 Hz, 1H), 8.09 (d, *J* = 8.5 Hz, 1H),

7.88 (s, 1H), 7.75 (d,  $J = 8.1$  Hz, 1H), 7.68 (t,  $J = 7.6$  Hz, 1H), 7.58 (d,  $J = 8.1$  Hz, 2H), 7.53 (t,  $J = 7.5$  Hz, 1H), 7.32 (d,  $J = 8.0$  Hz, 2H), 4.21 (s, 2H);  $^{13}\text{C}$  NMR (101 MHz,  $\text{CDCl}_3$ ):  $\delta$  151.63, 147.06, 145.26, 135.18, 132.55, 132.16, 129.71, 129.31, 129.22, 127.99, 127.50, 127.04, 118.78, 110.59, 39.22; IR (KBr): 3062, 2927, 1672, 1605, 1497, 1416, 912, 789; HRMS (ESI): Calcd. for  $\text{C}_{17}\text{H}_{13}\text{N}_2$   $[\text{M}+1]^+$ : 245.1073; found: 245.1077.

#### 3-(4-(methylsulfonyl)benzyl)quinoline (**3ad**)

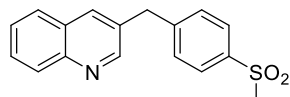

Yellow solid, m.p.: 125-127°C;  $^1\text{H}$  NMR (400 MHz,  $\text{CDCl}_3$ ):  $\delta$  8.68 (d,  $J = 2.0$  Hz, 1H), 7.98 (d,  $J = 8.5$  Hz, 1H), 7.81-7.75 (m, 3H), 7.67 (s, 1H), 7.58 (t,  $J = 7.7$  Hz, 1H), 7.44 (t,  $J = 7.5$  Hz, 1H), 7.32 (d,  $J = 8.2$  Hz, 2H), 4.14 (s, 2H), 2.94 (s, 3H);  $^{13}\text{C}$  NMR (101 MHz,  $\text{CDCl}_3$ ):  $\delta$  151.63, 147.02, 146.22, 138.91, 135.19, 132.27, 129.88, 129.30, 129.16, 128.00, 127.87, 127.52, 127.03, 44.53, 39.05; IR (KBr): 3060, 2926, 1669, 1496, 1306, 1146, 740; HRMS (ESI): Calcd. for  $\text{C}_{17}\text{H}_{16}\text{NO}_2\text{S}$   $[\text{M}+1]^+$ : 298.0896; found: 298.0898.

#### 4-(quinolin-3-ylmethyl)benzaldehyde (**3ae**)

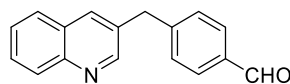

Yellow liquid,  $^1\text{H}$  NMR (400 MHz,  $\text{CDCl}_3$ ):  $\delta$  9.89 (s, 1H), 8.71 (d,  $J = 2.2$  Hz, 1H), 8.00 (d,  $J = 8.4$  Hz, 1H), 7.81 (s, 1H), 7.74 (d,  $J = 8.1$  Hz, 2H), 7.66 (d,  $J = 8.2$  Hz, 1H), 7.62 – 7.57 (m, 1H), 7.44 (t,  $J = 7.1$  Hz, 1H), 7.30 (d,  $J = 8.1$  Hz, 2H), 4.15 (s, 2H);  $^{13}\text{C}$  NMR (101 MHz,  $\text{CDCl}_3$ ):  $\delta$  191.78, 151.74, 147.01, 146.81, 135.14, 135.06, 132.57, 130.25, 129.62, 129.22, 128.05, 127.48, 126.96, 39.37; IR (KBr): 2828, 1698, 1604, 1497, 1211, 834; HRMS (ESI): Calcd. for  $\text{C}_{17}\text{H}_{14}\text{NO}$   $[\text{M}+1]^+$ : 248.1070; found: 248.1067.

#### 3-(4-methylbenzyl)quinoline (**3af**)

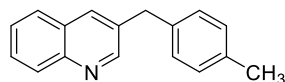

Yellow liquid,  $^1\text{H}$  NMR (400 MHz,  $\text{CDCl}_3$ ):  $\delta$  8.85 (d,  $J = 1.9$  Hz, 1H), 8.13 (d,  $J = 8.5$  Hz, 1H), 7.89 (s, 1H), 7.75 (d,  $J = 8.2$  Hz, 1H), 7.68 (t,  $J = 7.7$  Hz, 1H), 7.53 (t,  $J = 7.5$  Hz, 1H), 7.20-7.12 (m, 4H), 4.14 (s, 2H), 2.36 (s, 3H);  $^{13}\text{C}$  NMR (101 MHz,  $\text{CDCl}_3$ ):  $\delta$  152.17, 146.92, 136.66, 136.13, 134.77, 134.16, 129.46, 129.21, 128.87, 128.80, 128.19, 127.47, 126.65, 38.86, 21.05; IR (KBr): 3051, 2996, 1720, 1597, 1377, 786, 738; MS (EI,  $m/z$ ): 233.19  $[\text{M}]^+$ .

#### 3-(4-methoxybenzyl)quinoline (**3ag**)

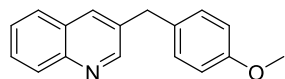

Yellow liquid,  $^1\text{H}$  NMR (400 MHz,  $\text{CDCl}_3$ ):  $\delta$  8.80 (s, 1H), 8.08 (d,  $J = 8.4$  Hz, 1H), 7.84 (s, 1H), 7.72 (d,  $J = 8.1$  Hz, 1H), 7.65 (t,  $J = 7.6$  Hz, 1H), 7.49 (t,  $J = 7.5$  Hz, 1H), 7.13 (d,  $J = 8.5$  Hz, 2H), 6.85 (d,  $J = 8.5$  Hz, 2H), 4.09 (s, 2H), 3.78 (s, 3H);  $^{13}\text{C}$  NMR (101 MHz,  $\text{CDCl}_3$ ):  $\delta$  158.33, 152.13, 146.87, 134.70, 134.32, 131.76, 129.96, 129.18, 128.81, 128.17, 127.46, 126.67, 114.18, 55.30, 38.38; IR (KBr): 2998, 2835, 1610, 1510, 1246, 1177, 1035, 788, 747; HRMS (ESI): Calcd. for  $\text{C}_{17}\text{H}_{16}\text{NO}$   $[\text{M}+1]^+$ : 250.1226; found: 250.1229.

#### 3-(3-methoxybenzyl)quinoline (**3ah**)

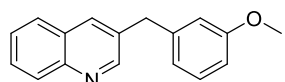

Light green liquid,  $^1\text{H}$  NMR (400 MHz,  $\text{CDCl}_3$ ):  $\delta$  8.81 (s, 1H), 8.08 (d,  $J = 8.4$  Hz, 1H), 7.87 (s, 1H), 7.72 (d,  $J$

= 8.1 Hz, 1H), 7.65 (t,  $J$  = 7.6 Hz, 1H), 7.49 (t,  $J$  = 7.5 Hz, 1H), 7.23 (t,  $J$  = 7.8 Hz, 1H), 6.79 (dd,  $J$  = 14.8, 7.8 Hz, 3H), 4.12 (s, 2H), 3.76 (s, 3H);  $^{13}\text{C}$  NMR (101 MHz,  $\text{CDCl}_3$ ):  $\delta$  159.95, 152.08, 146.94, 141.28, 134.86, 133.70, 129.77, 129.21, 128.87, 128.15, 127.49, 126.69, 121.38, 114.88, 111.79, 55.20, 39.28; IR (KBr): 2999, 2835, 1599, 1492, 1261, 1048, 787; MS (EI,  $m/z$ ): 249.21  $[\text{M}]^+$ .

3-(2-methoxybenzyl)quinoline (**3ai**)

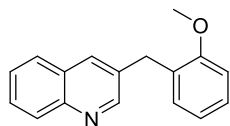

Light green solid, m.p.: 78-79°C;  $^1\text{H}$  NMR (400 MHz,  $\text{CDCl}_3$ ):  $\delta$  8.84-8.70 (m, 1H), 7.99 (t,  $J$  = 10.5 Hz, 1H), 7.77 (s, 1H), 7.60 (d,  $J$  = 8.1 Hz, 1H), 7.53 (t,  $J$  = 7.6 Hz, 1H), 7.37 (t,  $J$  = 7.5 Hz, 1H), 7.13 (t,  $J$  = 7.4 Hz, 1H), 7.06 (d,  $J$  = 7.3 Hz, 1H), 6.83-6.74 (m, 2H), 4.03 (s, 2H), 3.69 (s, 3H);  $^{13}\text{C}$  NMR (101 MHz,  $\text{CDCl}_3$ ):  $\delta$  157.32, 152.44, 146.76, 134.68, 133.95, 130.36, 129.12, 128.61, 128.34, 128.23, 128.06, 127.46, 126.46, 120.66, 110.56, 55.31, 33.73; IR (KBr): 3001, 2937, 2835, 1674, 1494, 1245, 750; MS (EI,  $m/z$ ): 249.18  $[\text{M}]^+$ .

*N,N*-dimethyl-4-(quinolin-3-ylmethyl)aniline (**3aj**)

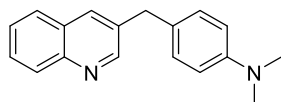

Brown liquid,  $^1\text{H}$  NMR (400 MHz,  $\text{CDCl}_3$ ):  $\delta$  8.81 (d,  $J$  = 2.1 Hz, 1H), 8.07 (d,  $J$  = 8.4 Hz, 1H), 7.84 (s, 1H), 7.70 (d,  $J$  = 8.3 Hz, 1H), 7.62 (t,  $J$  = 7.7 Hz, 1H), 7.47 (t,  $J$  = 7.5 Hz, 1H), 7.08 (d,  $J$  = 8.6 Hz, 2H), 6.69 (d,  $J$  = 8.6 Hz, 2H), 4.05 (s, 2H), 2.90 (s, 6H);  $^{13}\text{C}$  NMR (101 MHz,  $\text{CDCl}_3$ ):  $\delta$  152.31, 149.44, 146.86, 134.84, 134.60, 129.64, 129.18, 128.64, 128.24, 127.62, 127.48, 126.54, 113.04, 40.75, 38.30; IR (KBr): 2890, 2800, 1672, 1614, 1568, 1348, 806, 787; MS (EI,  $m/z$ ): 262.23  $[\text{M}]^+$ .

3-(naphthalen-1-ylmethyl)quinoline (**3ak**)

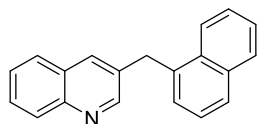

Yellow liquid,  $^1\text{H}$  NMR (400 MHz,  $\text{CDCl}_3$ ):  $\delta$  8.91 (s, 1H), 8.08 (d,  $J$  = 8.5 Hz, 1H), 7.96 (d,  $J$  = 7.8 Hz, 1H), 7.90-7.84 (m, 1H), 7.83-7.75 (m, 2H), 7.63 (t,  $J$  = 7.5 Hz, 2H), 7.49-7.41 (m, 4H), 7.33 (d,  $J$  = 7.0 Hz, 1H), 4.61 (s, 2H);  $^{13}\text{C}$  NMR (101 MHz,  $\text{CDCl}_3$ ):  $\delta$  151.91, 146.93, 135.22, 134.79, 134.07, 133.47, 131.88, 129.15, 128.88, 128.15, 127.73, 127.57, 127.51, 126.67, 126.34, 125.84, 125.63, 123.98, 36.46; IR (KBr): 3060, 1596, 1493, 1228, 782, 752; MS (EI,  $m/z$ ): 269.21  $[\text{M}]^+$ .

3-(pyridin-3-ylmethyl)quinoline (**3al**)

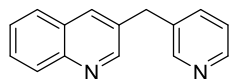

Yellow liquid,  $^1\text{H}$  NMR (400 MHz,  $\text{CDCl}_3$ ):  $\delta$  8.71 (d,  $J$  = 2.2 Hz, 1H), 8.49 (d,  $J$  = 1.6 Hz, 1H), 8.45 – 8.39 (m, 1H), 8.01 (d,  $J$  = 8.5 Hz, 1H), 7.79 (d,  $J$  = 1.1 Hz, 1H), 7.65 (d,  $J$  = 8.2 Hz, 1H), 7.62-7.56 (m, 1H), 7.43 (dd,  $J$  = 14.0, 7.1 Hz, 2H), 7.15 (dd,  $J$  = 7.8, 4.8 Hz, 1H), 4.07 (s, 2H);  $^{13}\text{C}$  NMR (101 MHz,  $\text{CDCl}_3$ ):  $\delta$  151.63, 150.13, 148.13, 147.01, 136.39, 135.20, 135.00, 132.57, 129.20, 128.00, 127.45, 126.95, 123.67, 36.38; IR (KBr): 3029, 2923, 1674, 1515, 1423, 1124, 753, 787; HRMS (ESI): Calcd. for  $\text{C}_{15}\text{H}_{13}\text{N}_2$   $[\text{M}+1]^+$ : 221.1073; found: 221.1074.

3-(furan-2-ylmethyl)quinoline (**3am**)

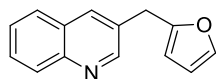

Brown liquid,  $^1\text{H}$  NMR (400 MHz,  $\text{CDCl}_3$ ):  $\delta$  8.83 (s, 1H), 8.09 (d,  $J$  = 8.5 Hz, 1H), 7.95 (s, 1H), 7.75 (d,  $J$  = 8.1 Hz, 1H), 7.66 (t,  $J$  = 7.6 Hz, 1H), 7.51 (t,  $J$  = 7.5 Hz, 1H), 7.35 (s, 1H), 6.31 (s, 1H), 6.07 (d,  $J$  = 2.9 Hz, 1H), 4.14 (s, 2H);  $^{13}\text{C}$  NMR (101 MHz,  $\text{CDCl}_3$ ):  $\delta$  153.10, 151.68, 147.08, 141.96, 134.96, 130.93, 129.21, 129.05, 128.06, 127.52, 126.76, 110.45, 106.84, 31.96; IR (KBr): 3115, 3063, 1497, 1421, 1011, 788, 731; MS (EI,  $m/z$ ): 209.15  $[\text{M}]^+$ .

3-(thiophen-2-ylmethyl)quinoline (**3an**)

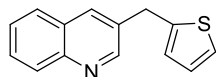

Brown liquid,  $^1\text{H}$  NMR (400 MHz,  $\text{CDCl}_3$ ):  $\delta$  8.75 (d,  $J$  = 1.6 Hz, 1H), 8.00 (d,  $J$  = 8.4 Hz, 1H), 7.85 (s, 1H), 7.65 (d,  $J$  = 8.1 Hz, 1H), 7.57 (t,  $J$  = 7.7 Hz, 1H), 7.42 (t,  $J$  = 7.6 Hz, 1H), 7.08 (d,  $J$  = 5.1 Hz, 1H), 6.89-6.83 (m, 1H), 6.75 (d,  $J$  = 3.3 Hz, 1H), 4.23 (s, 2H);  $^{13}\text{C}$  NMR (101 MHz,  $\text{CDCl}_3$ ):  $\delta$  151.66, 147.09, 142.39, 134.70, 133.14, 129.24, 129.08, 128.07, 127.57, 127.10, 126.80, 125.74, 124.54, 33.43; IR (KBr): 3065, 2920, 1608, 1570, 1252, 849, 753; MS (EI,  $m/z$ ): 225.14  $[\text{M}]^+$ .

3-(4-chlorobenzyl)-6-methylquinoline (**3bb**)

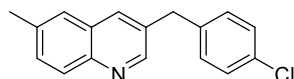

Yellow liquid,  $^1\text{H}$  NMR (400 MHz,  $\text{CDCl}_3$ ):  $\delta$  7.97 (d,  $J$  = 9.2 Hz, 1H), 7.74 (d,  $J$  = 1.2 Hz, 1H), 7.53-7.45 (m, 2H), 7.29-7.23 (m, 2H), 7.13 (d,  $J$  = 8.4 Hz, 2H), 4.09 (s, 2H), 2.50 (s, 3H);  $^{13}\text{C}$  NMR (101 MHz,  $\text{CDCl}_3$ ):  $\delta$  150.94, 145.57, 138.28, 136.72, 134.28, 133.24, 132.41, 131.33, 130.28, 128.85, 128.12, 126.30, 38.56, 21.59; IR (KBr): 3061, 2925, 1673, 1570, 1089, 1016, 787; MS (EI,  $m/z$ ): 267.15  $[\text{M}]^+$ .

6-methyl-3-(4-methylbenzyl)quinoline (**3bf**)

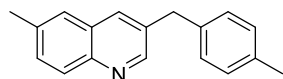

Yellow liquid,  $^1\text{H}$  NMR (400 MHz,  $\text{CDCl}_3$ ):  $\delta$  8.63 (d,  $J$  = 2.0 Hz, 1H), 7.87 (d,  $J$  = 9.2 Hz, 1H), 7.65 (s, 1H), 7.36 (d,  $J$  = 7.1 Hz, 2H), 7.00 (s, 4H), 3.98 (s, 2H), 2.38 (s, 3H), 2.21 (s, 3H);  $^{13}\text{C}$  NMR (101 MHz,  $\text{CDCl}_3$ ):  $\delta$  151.22, 145.48, 136.77, 136.49, 136.06, 134.20, 134.10, 131.09, 129.42, 128.85, 128.81, 128.22, 126.32, 38.85, 21.59, 21.04; IR (KBr): 3015, 2919, 1603, 1570, 1432, 1129, 825; MS (EI,  $m/z$ ): 247.22  $[\text{M}]^+$ .

6-methyl-3-(pyridin-3-ylmethyl)quinoline (**3bl**)

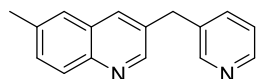

Yellow solid, m.p.: 53-54°C;  $^1\text{H}$  NMR (400 MHz,  $\text{CDCl}_3$ ):  $\delta$  8.72 (d,  $J$  = 2.2 Hz, 1H), 8.57 (d,  $J$  = 1.8 Hz, 1H), 8.50 (dd,  $J$  = 4.8, 1.4 Hz, 1H), 7.97 (d,  $J$  = 8.3 Hz, 1H), 7.77 (d,  $J$  = 1.2 Hz, 1H), 7.53-7.46 (m, 3H), 7.22 (dd,  $J$  = 7.6, 4.8 Hz, 1H), 4.14 (s, 2H), 2.51 (s, 3H);  $^{13}\text{C}$  NMR (101 MHz,  $\text{CDCl}_3$ ):  $\delta$  150.74, 150.16, 148.10, 136.84, 136.33, 135.30, 134.34, 132.51, 131.46, 128.87, 128.05, 126.27, 123.61, 36.39, 21.57; IR (KBr): 3028, 2920, 1573, 1423, 1027, 831, 717; HRMS (ESI): Calcd. for  $\text{C}_{16}\text{H}_{15}\text{N}_2$   $[\text{M}+1]^+$ : 235.1230; found: 235.1231.

### 3-benzyl-8-methylquinoline (**3da**)

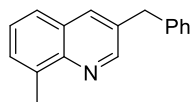

Yellow solid, m.p.: 58-59°C (Lit<sup>2</sup>, 61-62°C); <sup>1</sup>H NMR (400 MHz, CDCl<sub>3</sub>): δ 8.72 (d, *J* = 2.2 Hz, 1H), 7.71 (d, *J* = 2.1 Hz, 1H), 7.43 (d, *J* = 8.1 Hz, 1H), 7.36 (d, *J* = 6.9 Hz, 1H), 7.28 - 7.22 (m, 1H), 7.21 - 7.13 (m, 2H), 7.10 (dd, *J* = 7.0, 4.8 Hz, 3H), 4.01 (s, 2H), 2.69 (s, 3H); <sup>13</sup>C NMR (101 MHz, CDCl<sub>3</sub>): δ 150.95, 146.06, 139.90, 136.95, 135.15, 133.57, 129.10, 129.00, 128.77, 128.17, 126.55, 126.51, 125.59, 39.24, 18.15; IR (KBr): 3127, 2920, 1602, 1492, 1073, 769, 714; MS (EI, *m/z*): 233.19[M]<sup>+</sup>.

### 8-methyl-3-(4-methylbenzyl)quinoline (**3df**)

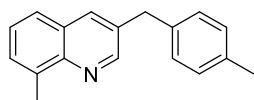

Green liquid; <sup>1</sup>H NMR (400 MHz, CDCl<sub>3</sub>): δ 8.82 (d, *J* = 2.2 Hz, 1H), 7.81 (d, *J* = 2.1 Hz, 1H), 7.54 (d, *J* = 8.1 Hz, 1H), 7.47 (d, *J* = 6.9 Hz, 1H), 7.39-7.33 (m, 1H), 7.09 (s, 4H), 4.09 (d, *J* = 7.9 Hz, 2H), 2.79 (s, 3H), 2.30 (s, 3H); <sup>13</sup>C NMR (101 MHz, CDCl<sub>3</sub>): δ 150.98, 146.01, 136.91, 136.84, 136.06, 135.06, 133.84, 129.43, 129.02, 128.86, 128.18, 126.44, 125.58, 38.81, 21.04, 18.14; IR (KBr): 2920, 1603, 1512, 1402, 1114, 771, 738; HRMS (ESI): Calcd. for C<sub>18</sub>H<sub>18</sub>N [M+1]<sup>+</sup>: 248.1434; found: 248.1433.

### 3-(4-chlorobenzyl)-8-methylquinoline (**3db**)

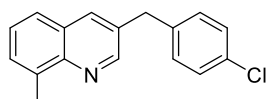

Yellow solid, m.p.: 51-52°C; <sup>1</sup>H NMR (400 MHz, CDCl<sub>3</sub>): δ 8.68 (d, *J* = 2.3 Hz, 1H), 7.70-7.66 (m, 1H), 7.44 (d, *J* = 8.1 Hz, 1H), 7.38 (d, *J* = 6.9 Hz, 1H), 7.29-7.24 (m, 1H), 7.16-7.12 (m, 2H), 7.00 (d, *J* = 8.6 Hz, 2H), 3.96 (s, 2H), 2.69 (s, 3H); <sup>13</sup>C NMR (101 MHz, CDCl<sub>3</sub>): δ 150.70, 146.12, 138.35, 136.99, 135.13, 132.97, 132.41, 130.29, 129.24, 128.86, 128.08, 126.63, 125.56, 38.51, 18.11; IR (KBr): 3030, 2920, 1577, 1405, 1091, 836, 770; MS (EI, *m/z*): 267.15[M]<sup>+</sup>.

### 8-methyl-3-(4-(methylsulfonyl)benzyl)quinoline (**3dd**)

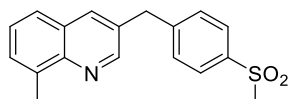

Gray solid, m.p.: 103-104°C; <sup>1</sup>H NMR (400 MHz, CDCl<sub>3</sub>): δ 8.80 (d, *J* = 2.3 Hz, 1H), 7.87 (dd, *J* = 5.5, 2.8 Hz, 3H), 7.60 (d, *J* = 8.1 Hz, 1H), 7.52 (d, *J* = 6.9 Hz, 1H), 7.42 (t, *J* = 7.3 Hz, 3H), 4.23 (s, 2H), 3.03 (s, 3H), 2.80 (s, 3H); <sup>13</sup>C NMR (101 MHz, CDCl<sub>3</sub>): δ 150.44, 146.40, 146.15, 138.89, 136.98, 135.43, 131.94, 129.87, 129.48, 128.00, 127.84, 126.82, 125.57, 44.54, 39.02, 18.05; IR (KBr): 2925, 1597, 1492, 1407, 1305, 1148, 774; HRMS (ESI): Calcd. for C<sub>18</sub>H<sub>18</sub>NO<sub>2</sub>S [M+1]<sup>+</sup>: 312.1053; found: 312.1051.

### 8-methyl-3-(4-(trifluoromethyl)benzyl)quinoline (**3do**)

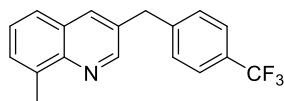

Yellow solid, m.p.: 77-78°C; <sup>1</sup>H NMR (400 MHz, CDCl<sub>3</sub>): δ 8.84 (d, *J* = 2.2 Hz, 1H), 7.89 (d, *J* = 2.0 Hz, 1H), 7.64-7.54 (m, 4H), 7.47-7.42 (m, 1H), 7.37 (d, *J* = 8.0 Hz, 2H), 4.25 (s, 2H), 2.83 (s, 3H); <sup>13</sup>C NMR (101 MHz, CDCl<sub>3</sub>): δ 150.59, 146.17, 143.93, 137.03, 135.29, 132.40, 129.34, 129.36, 128.98 (d, *J* = 33.0 Hz), 128.05, 126.71, 125.68 (q, *J* = 4.0 Hz), 38.98, 18.04; IR (KBr): 2925, 1620, 1492, 1418, 1165, 1124, 1067, 773; HRMS



(ESI): Calcd. for  $C_{18}H_{15}F_3N$   $[M+1]^+$ : 302.1151; found: 302.1152.

8-methyl-3-(pyridin-3-ylmethyl)quinoline (**3dl**)

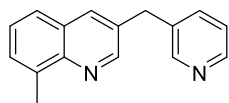

Yellow liquid,  $^1H$  NMR (400 MHz,  $CDCl_3$ ):  $\delta$  8.71 (d,  $J$  = 2.3 Hz, 1H), 8.47 (d,  $J$  = 1.8 Hz, 1H), 8.39 (dd,  $J$  = 4.8, 1.3 Hz, 1H), 7.74 (d,  $J$  = 2.1 Hz, 1H), 7.47 (d,  $J$  = 8.1 Hz, 1H), 7.43-7.36 (m, 2H), 7.33-7.27 (m, 1H), 7.10 (dd,  $J$  = 7.8, 4.8 Hz, 1H), 4.04 (s, 2H), 2.70 (s, 3H);  $^{13}C$  NMR (101 MHz,  $CDCl_3$ ):  $\delta$  150.46, 150.15, 148.08, 146.15, 136.99, 136.32, 135.34, 135.21, 132.23, 129.34, 127.99, 126.72, 125.51, 123.60, 36.32, 18.05; IR (KBr): 3030, 2921, 1576, 1515, 1491, 1424, 1264, 770, 732; HRMS (ESI): Calcd. for  $C_{16}H_{15}N_2$   $[M+1]^+$ : 235.1230; found: 235.1232.

3-heptyl-8-methylquinoline (**3dp**)

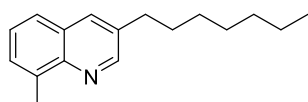

Yellow liquid,  $^1H$  NMR (400 MHz,  $CDCl_3$ )  $\delta$  8.73 (d,  $J$  = 2.0 Hz, 1H), 7.81 (d,  $J$  = 2.0 Hz, 1H), 7.53 (d,  $J$  = 8.1 Hz, 1H), 7.42 (d,  $J$  = 6.9 Hz, 1H), 7.38-7.29 (m, 1H), 2.76-2.69 (m, 5H), 1.64 (dt,  $J$  = 15.2, 7.6 Hz, 2H), 1.34-1.20 (m, 8H), 0.81 (t,  $J$  = 6.9 Hz, 3H);  $^{13}C$  NMR (101 MHz,  $CDCl_3$ ):  $\delta$  150.92, 145.80, 136.78, 135.08, 134.51, 128.75, 128.21, 126.31, 125.41, 33.13, 31.78, 31.15, 29.14, 29.12, 22.64, 18.13, 14.07; IR (KBr): 2957, 2800, 1639, 1547, 1427, 1173, 1068, 885, 771; HRMS (ESI): Calcd. for  $C_{17}H_{24}N$   $[M+1]^+$ : 242.1903; found: 242.1899.

3-(cyclohexylmethyl)-8-methylquinoline (**3dq**)

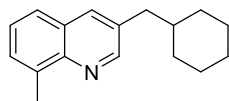

Yellow liquid,  $^1H$  NMR (400 MHz,  $CDCl_3$ )  $\delta$  8.80 (d,  $J$  = 2.1 Hz, 1H), 7.86 (d,  $J$  = 2.0 Hz, 1H), 7.62 (d,  $J$  = 8.1 Hz, 1H), 7.51 (d,  $J$  = 6.9 Hz, 1H), 7.43 (d,  $J$  = 7.7 Hz, 1H), 2.84 (s, 3H), 2.68 (d,  $J$  = 7.0 Hz, 2H), 1.77-1.61 (m, 6H), 1.19 (d,  $J$  = 8.5 Hz, 3H), 1.03 (s, 2H);  $^{13}C$  NMR (101 MHz,  $CDCl_3$ )  $\delta$  151.37, 145.91, 136.82, 135.28, 133.53, 128.71, 128.09, 126.27, 125.43, 41.15, 39.66, 33.03, 26.45, 26.21, 18.12; IR (KBr): 2927, 2810, 1629, 1566, 1519, 1481, 1173, 1048, 875, 778; MS (EI,  $m/z$ ): 239.17  $[M]^+$

6-chloro-3-(4-chlorobenzyl)quinoline (**3cb**)

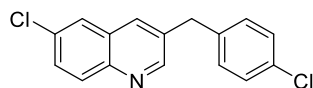

Light yellow solid, m.p.: 130-132°C;  $^1H$  NMR (400 MHz,  $CDCl_3$ )  $\delta$  8.65 (d,  $J$  = 2.1 Hz, 1H), 7.89 (d,  $J$  = 9.0 Hz, 1H), 7.61 (s, 1H), 7.58 (d,  $J$  = 2.2 Hz, 1H), 7.47 (dd,  $J$  = 9.0, 2.3 Hz, 1H), 7.17 (d,  $J$  = 8.3 Hz, 2H), 7.02 (d,  $J$  = 8.3 Hz, 2H), 3.99 (s, 2H);  $^{13}C$  NMR (101 MHz,  $CDCl_3$ ):  $\delta$  152.08, 145.32, 137.72, 134.34, 133.82, 132.63, 132.55, 130.83, 130.29, 129.91, 128.97, 128.67, 126.11, 38.50; IR (KBr): 3118, 2987, 1597, 1425, 1348, 1072, 798; MS (EI,  $m/z$ ): 287.11  $[M]^+$ .

methyl 3-(4-chlorobenzyl)quinoline-6-carboxylate (**3eb**)

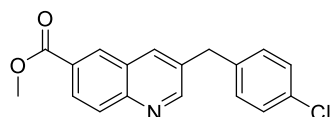

Brown solid, m.p.:97-98°C;  $^1\text{H}$  NMR (400 MHz,  $\text{CDCl}_3$ )  $\delta$  8.87 (s, 1H), 8.51 (d,  $J$  = 1.6 Hz, 1H), 8.26 (dd,  $J$  = 8.8, 1.8 Hz, 1H), 8.12 (d,  $J$  = 8.8 Hz, 1H), 7.94 (s, 1H), 7.32 – 7.29 (m, 2H), 7.16 (d,  $J$  = 8.4 Hz, 2H), 4.15 (s, 2H), 3.99 (s, 3H);  $^{13}\text{C}$  NMR (101 MHz,  $\text{CDCl}_3$ ):  $\delta$  166.56, 153.94, 148.69, 137.64, 135.97, 134.28, 132.69, 130.63, 130.31, 129.49, 129.00, 128.55, 128.37, 52.41, 38.48; IR (KBr): 2951, 1598, 1493, 1278, 1097, 790, 748; MS (EI,  $m/z$ ): 311.01[M] $^+$ .

3-(4-chlorobenzyl)benzo[h]quinoline (**3fb**)

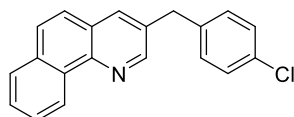

Yellow solid, m.p.:99-100°C;  $^1\text{H}$  NMR (400 MHz,  $\text{CDCl}_3$ ):  $\delta$  9.14 (d,  $J$  = 8.2 Hz, 1H), 8.69 (d,  $J$  = 2.2 Hz, 1H), 7.72 (d,  $J$  = 7.9 Hz, 1H), 7.66 (d,  $J$  = 2.0 Hz, 1H), 7.59 (dd,  $J$  = 11.4, 8.4 Hz, 2H), 7.52 (dd,  $J$  = 11.4, 4.8 Hz, 1H), 7.40 (d,  $J$  = 8.8 Hz, 1H), 3.94 (s, 2H);  $^{13}\text{C}$  NMR (101 MHz,  $\text{CDCl}_3$ ):  $\delta$  149.91, 145.13, 138.45, 135.11, 134.09, 133.46, 132.43, 131.46, 130.33, 128.88, 127.18, 126.25, 127.18, 126.25, 125.19, 124.28, 38.46; IR (KBr): 3052, 2839, 1627, 1566, 1446, 1092, 885, 771; HRMS (ESI): Calcd. for  $\text{C}_{20}\text{H}_{15}\text{ClN}$  [M+1] $^+$ : 304.0888; found: 304.0892.

4-(benzo[h]quinolin-3-ylmethyl)-N,N-dimethylaniline (**3fj**)

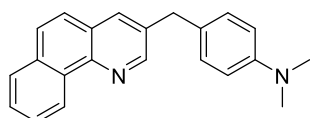

Yellow solid, m.p.:93-94°C;  $^1\text{H}$  NMR (400 MHz,  $\text{CDCl}_3$ ):  $\delta$  9.16 (d,  $J$  = 8.1 Hz, 1H), 8.80 (d,  $J$  = 2.1 Hz, 1H), 7.81-7.75 (m, 2H), 7.67-7.53 (m, 3H), 7.48 (d,  $J$  = 8.8 Hz, 1H), 7.02 (d,  $J$  = 8.6 Hz, 2H), 6.61 (d,  $J$  = 8.7 Hz, 2H), 4.01 (s, 2H), 2.81 (s, 6H);  $^{13}\text{C}$  NMR (101 MHz,  $\text{CDCl}_3$ ):  $\delta$  150.22, 149.42, 144.84, 135.66, 135.04, 133.35, 131.53, 129.65, 127.97, 127.81, 127.72, 127.02, 126.33, 125.38, 124.20, 113.09, 40.79, 38.22; IR (KBr): 2907, 2844, 1615, 1446, 1347, 1163, 803; HRMS (ESI): Calcd. for  $\text{C}_{22}\text{H}_{21}\text{N}_2$  [M+1] $^+$ : 313.1699; found: 313.1694.

4-benzylisoquinoline (**3ga**)

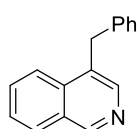

Yellow solid, m.p.:116-117°C (Lit<sup>3</sup>, 116-117°C);  $^1\text{H}$  NMR (400 MHz,  $\text{CDCl}_3$ ):  $\delta$  9.09 (s, 1H), 8.33 (s, 1H), 7.84 (dd,  $J$  = 23.7, 8.2 Hz, 2H), 7.54 (d,  $J$  = 7.0 Hz, 1H), 7.46 (t,  $J$  = 7.3 Hz, 1H), 7.19-7.14 (m, 2H), 7.10 (d,  $J$  = 7.4 Hz, 3H), 4.28 (s, 2H);  $^{13}\text{C}$  NMR (101 MHz,  $\text{CDCl}_3$ ):  $\delta$  151.96, 143.79, 139.75, 134.88, 130.41, 129.68, 128.61, 128.56, 128.26, 126.96, 126.38, 123.51, 36.28; IR (KBr): 3022, 2921, 1622, 1492, 1348, 939, 754; MS (EI,  $m/z$ ): 219.11[M] $^+$ .

4-(4-chlorobenzyl)isoquinoline (**3gb**)

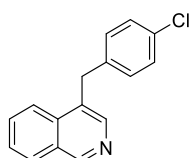

Yellow liquid,  $^1\text{H}$  NMR (400 MHz,  $\text{CDCl}_3$ )  $\delta$  9.09 (s, 1H), 8.30 (s, 1H), 7.88 (d,  $J$  = 7.9 Hz, 1H), 7.74 (d,  $J$  = 8.5 Hz, 1H), 7.54 (t,  $J$  = 7.6 Hz, 1H), 7.47 (t,  $J$  = 7.5 Hz, 1H), 7.15 – 7.09 (m, 2H), 7.01 (d,  $J$  = 8.5 Hz, 2H), 4.23 (s, 2H);  $^{13}\text{C}$  NMR (101 MHz,  $\text{CDCl}_3$ ):  $\delta$  152.17, 143.71, 138.22, 134.70, 132.20, 130.56, 129.85, 129.17, 128.74, 128.64, 128.36, 127.09, 123.30, 35.64; IR (KBr): 3054, 2926, 1624, 1492, 1390, 1091, 799, 698; MS (EI,  $m/z$ ): 253.05[M] $^+$ .

4-(4-methylbenzyl)isoquinoline (**3gf**)

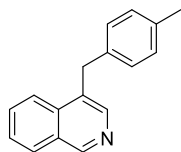

Yellow liquid,  $^1\text{H}$  NMR (400 MHz,  $\text{CDCl}_3$ )  $\delta$  9.21 (s, 1H), 8.46 (s, 1H), 7.97 (dd,  $J$  = 14.1, 8.3 Hz, 2H), 7.68 – 7.63 (m, 1H), 7.58 (t,  $J$  = 7.4 Hz, 1H), 7.14–7.08 (m, 4H), 4.36 (s, 2H), 2.32 (s, 3H);  $^{13}\text{C}$  NMR (101 MHz,  $\text{CDCl}_3$ ):  $\delta$  151.88, 143.71, 136.69, 135.88, 134.89, 130.37, 129.95, 129.31, 128.64, 128.44, 128.24, 126.92, 123.54, 35.88, 21.02; IR (KBr): 3019, 2920, 1623, 1512, 1389, 1262, 785, 750; MS (EI,  $m/z$ ): 233.15 $[\text{M}]^+$ .

8-chloro-4-(4-methylbenzyl)isoquinoline (**3hf**)

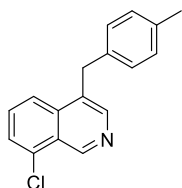

Light yellow solid, m.p.: 118–119°C;  $^1\text{H}$  NMR (400 MHz,  $\text{CDCl}_3$ ):  $\delta$  9.65 (s, 1H), 8.53 (s, 1H), 7.86 (d,  $J$  = 8.4 Hz, 1H), 7.59 (dd,  $J$  = 7.4, 0.8 Hz, 1H), 7.55–7.49 (m, 1H), 7.09 (d,  $J$  = 2.1 Hz, 4H), 4.36 (s, 2H), 2.32 (s, 3H);  $^{13}\text{C}$  NMR (101 MHz,  $\text{CDCl}_3$ ):  $\delta$  148.76, 144.65, 136.32, 136.06, 133.13, 130.22, 129.70, 129.38, 128.37, 127.34, 125.76, 122.77, 35.97, 21.01; IR (KBr): 3019, 1644, 1613, 1511, 1390, 1120, 1078, 896, 745; HRMS (ESI): Calcd. for  $\text{C}_{17}\text{H}_{15}\text{ClN}$   $[\text{M}+1]^+$ : 268.0888; found: 268.0883.

References

- 1 Hartlen, K. D.; Athanasopoulos, A. P. T.; Kitaev, V. *Langmuir* **2008**, *24*, 1714–1720.
- 2 Avramoff, M.; Sprinzak, Y. *J. Org. Chem.* **1957**, *22*, 571–574.
- 3 Clark, R. D. *Heterocycles* **1987**, *26*, 2945–2948.

## 6. NMR Spectra of the Obtained Compounds

<sup>1</sup>H- NMR spectrum of 3-benzylquinoline (3aa)

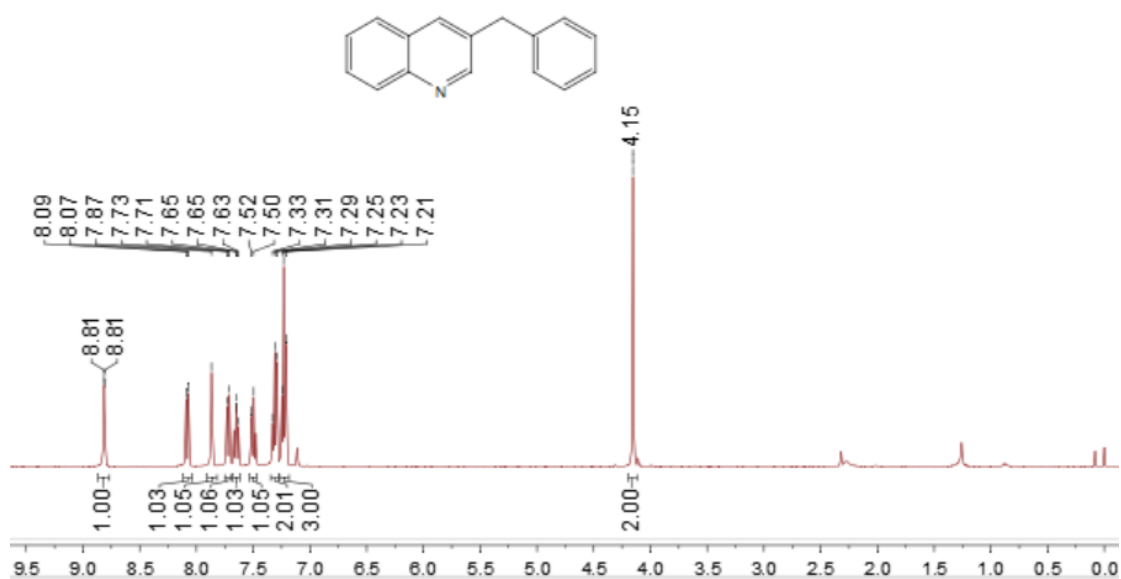

<sup>13</sup>C-NMR spectrum of 3-benzylquinoline (3aa)

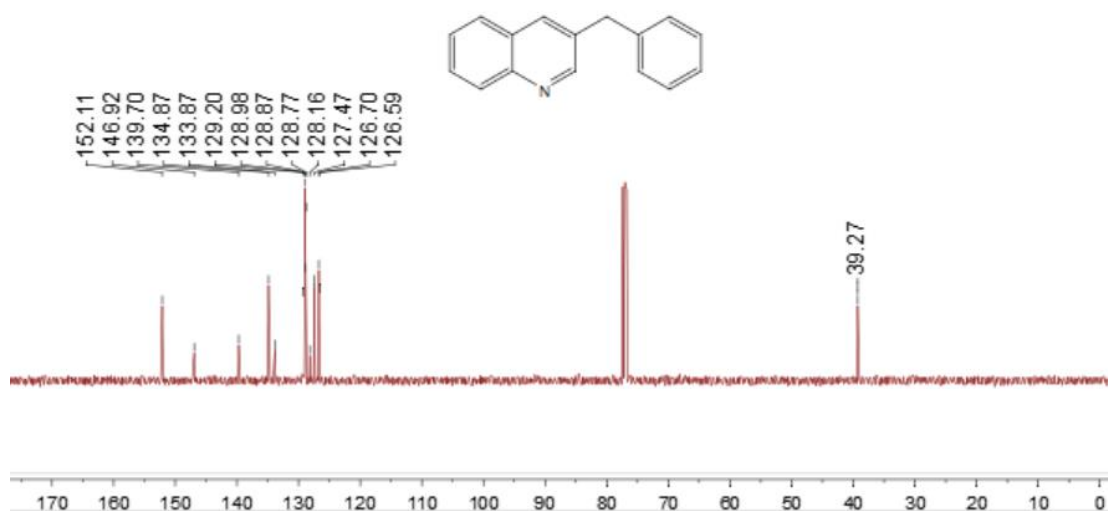

<sup>1</sup>H-NMR spectrum of 3-(4-chlorobenzyl)quinoline (3ab)

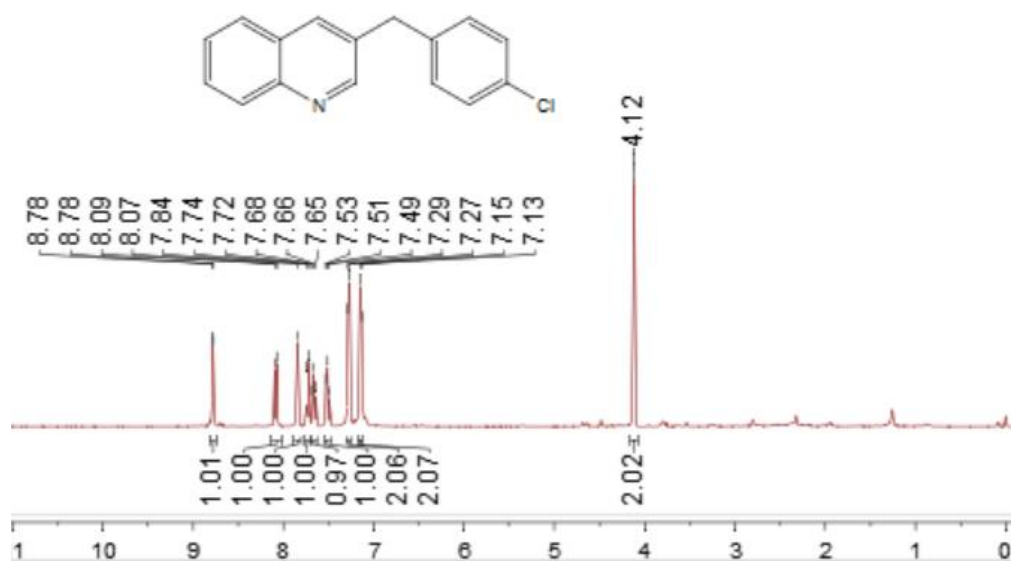

<sup>13</sup>C-NMR spectrum of 3-(4-chlorobenzyl)quinoline (3ab)

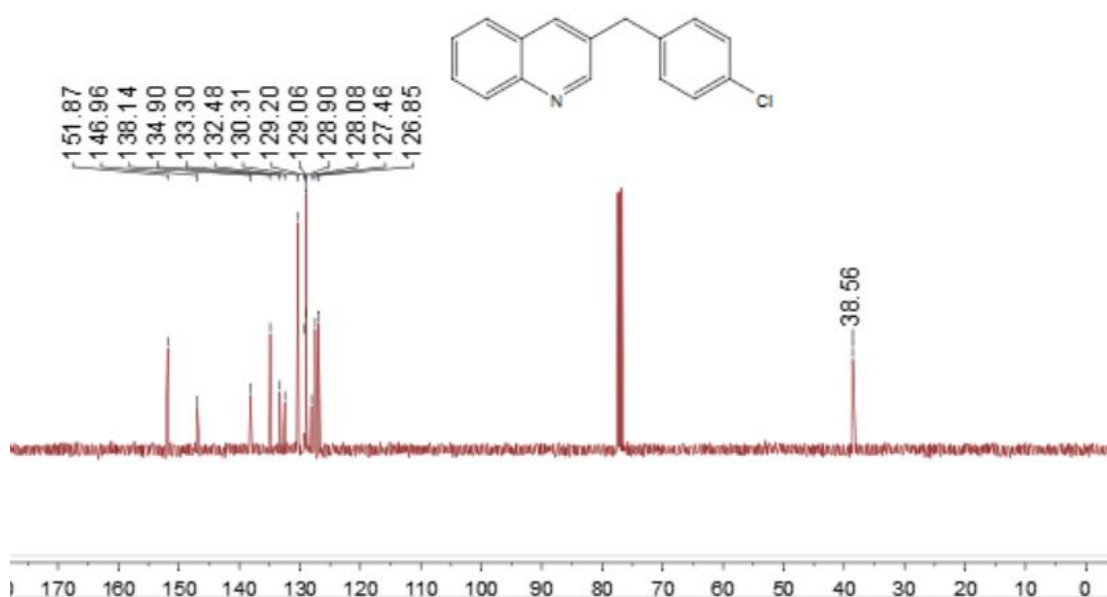

<sup>1</sup>H- NMR spectrum of 4-(quinolin-3-ylmethyl)benzonitrile (3ac)

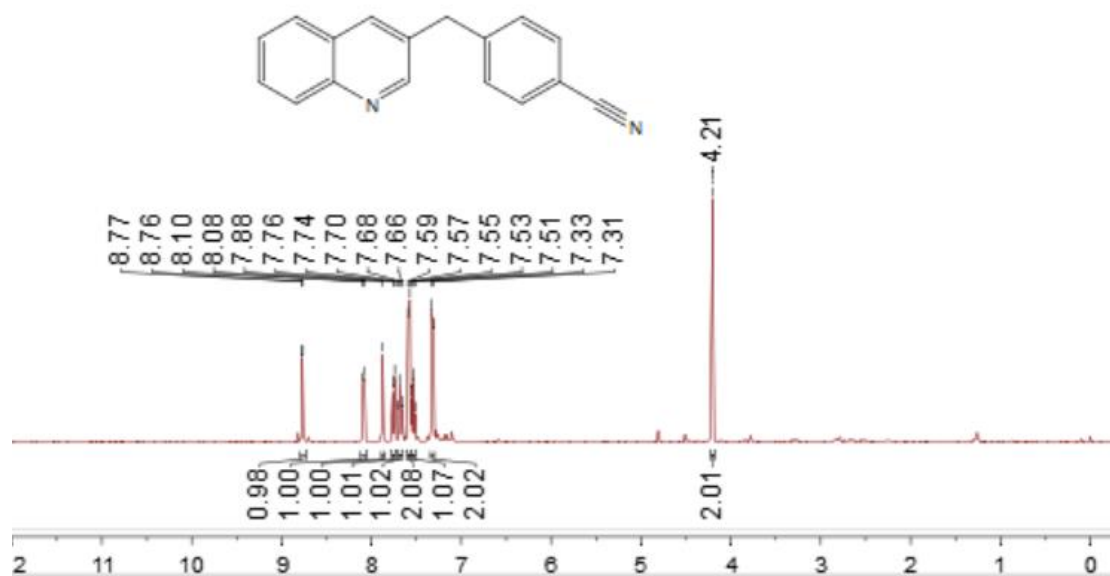

<sup>13</sup>C-NMR spectrum of 4-(quinolin-3-ylmethyl)benzonitrile (3ac)

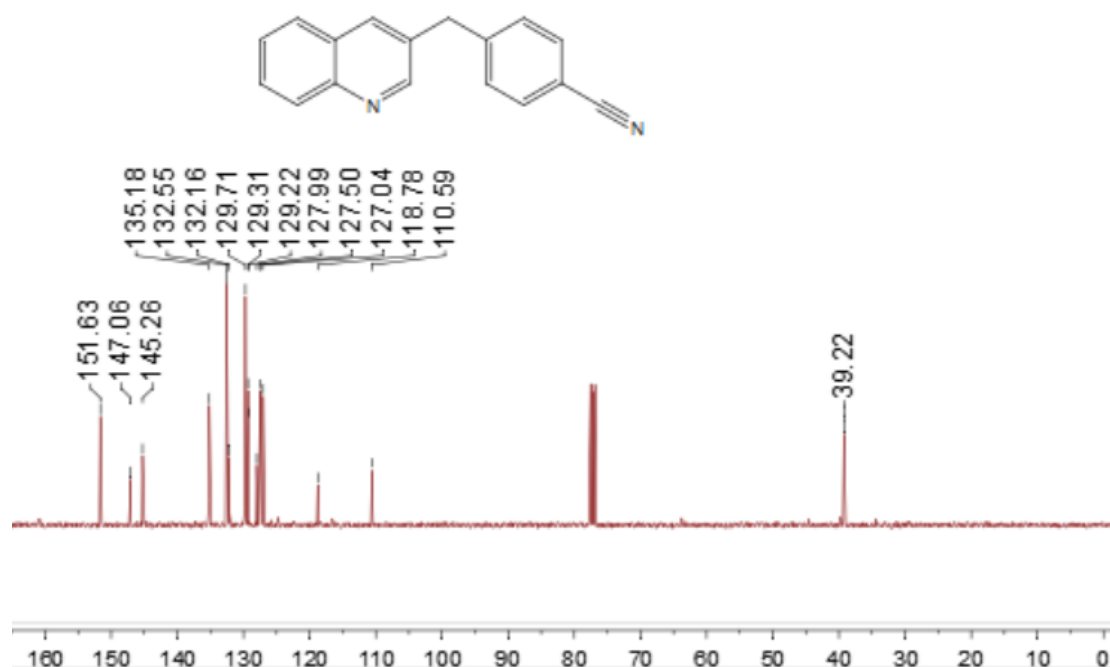

<sup>1</sup>H-NMR spectrum of 3-(4-(methylsulfonyl)benzyl)quinoline (3ad)

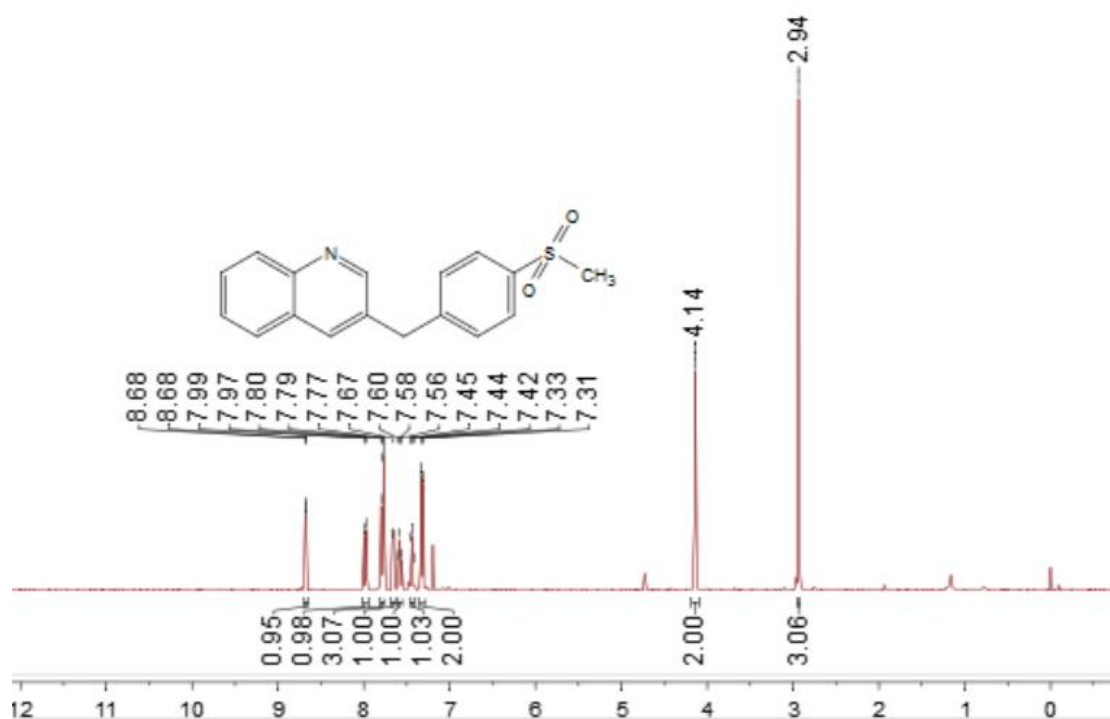

<sup>13</sup>C-NMR spectrum of 3-(4-(methylsulfonyl)benzyl)quinoline (3ad)

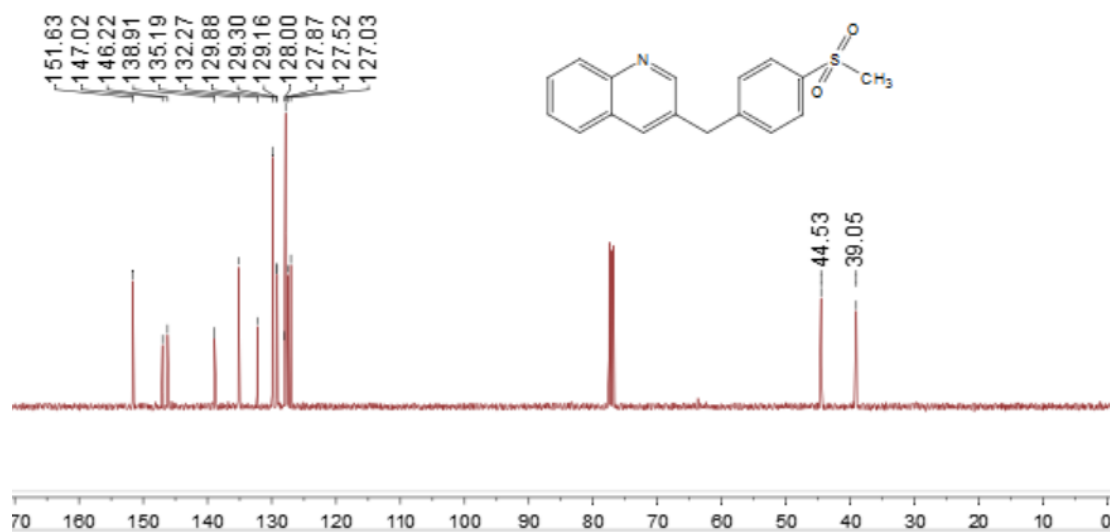

<sup>1</sup>H-NMR spectrum of 4-(quinolin-3-ylmethyl)benzaldehyde (3ae)

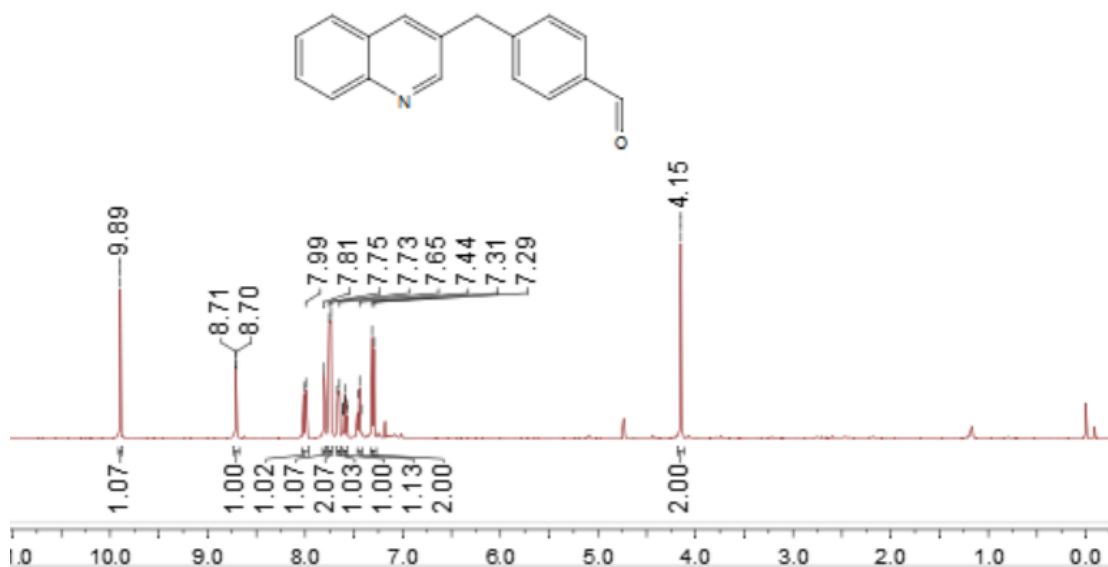

<sup>13</sup>C-NMR spectrum of 4-(quinolin-3-ylmethyl)benzaldehyde (3ae)

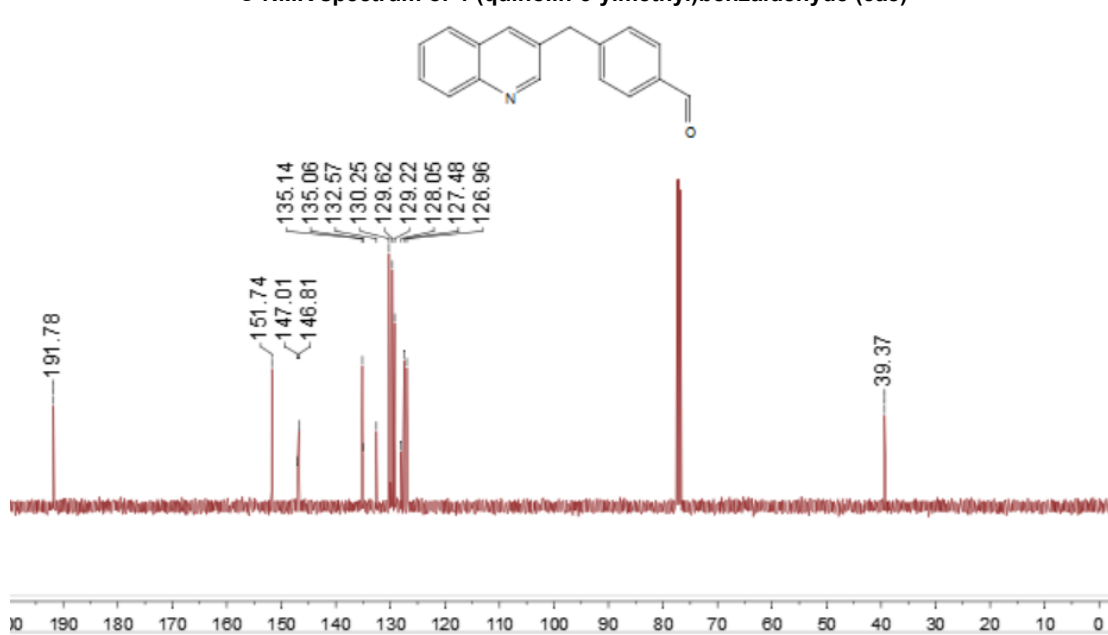



<sup>1</sup>H-NMR spectrum of 3-(4-methylbenzyl)quinoline (3af)

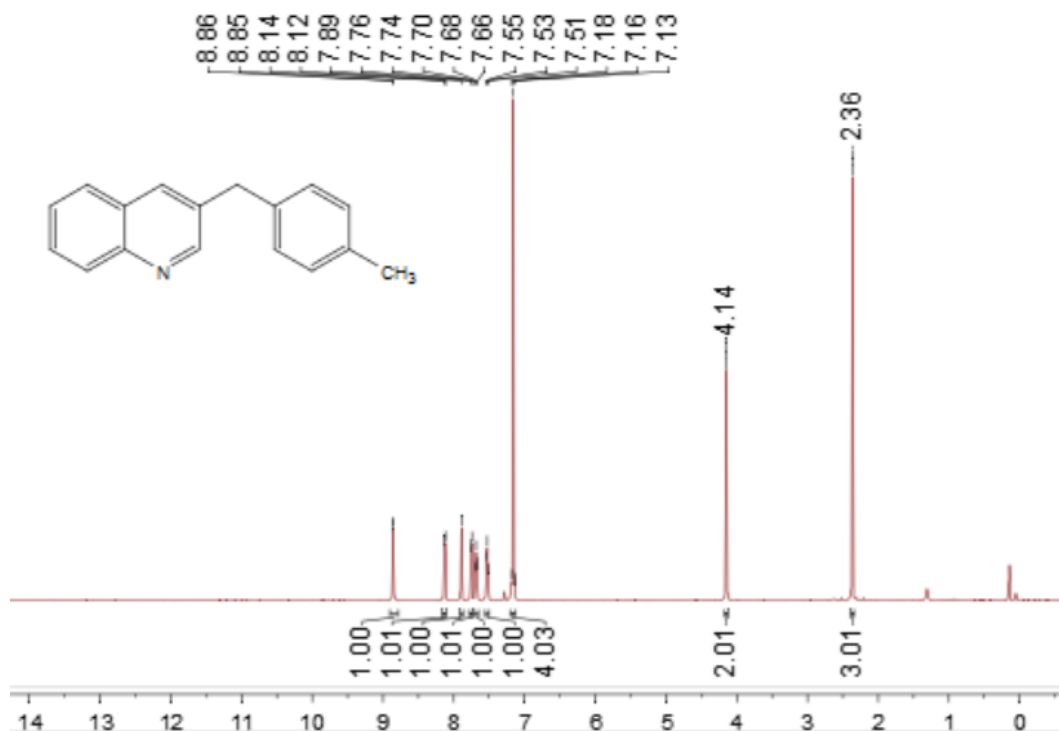

<sup>13</sup>C-NMR spectrum of 3-(4-methylbenzyl)quinoline (3af)

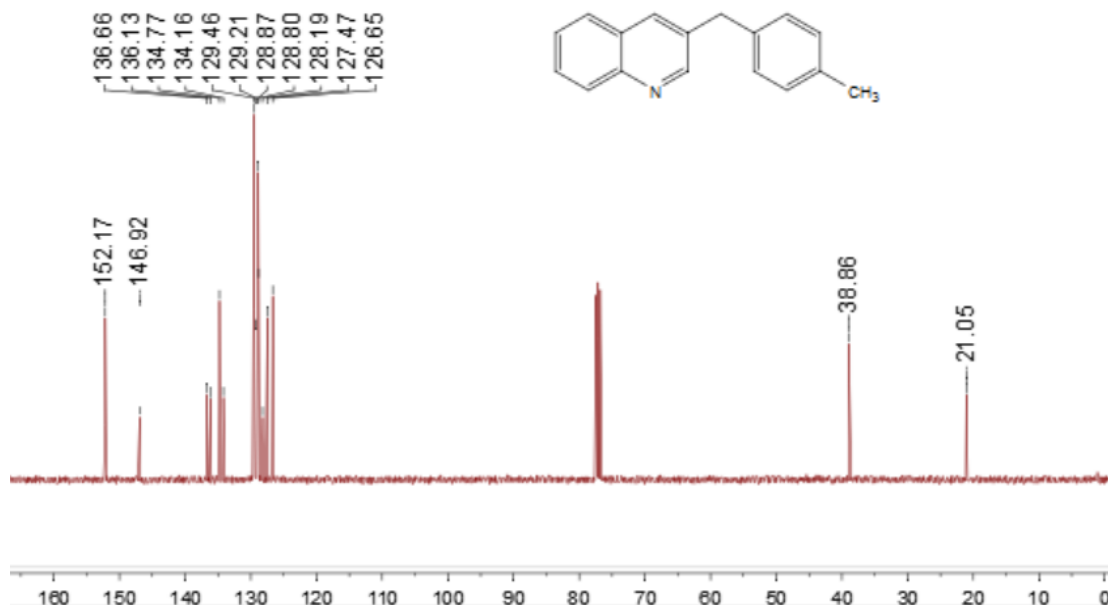

<sup>1</sup>H- NMR spectrum of 3-(4-methoxybenzyl)quinoline (3ag)

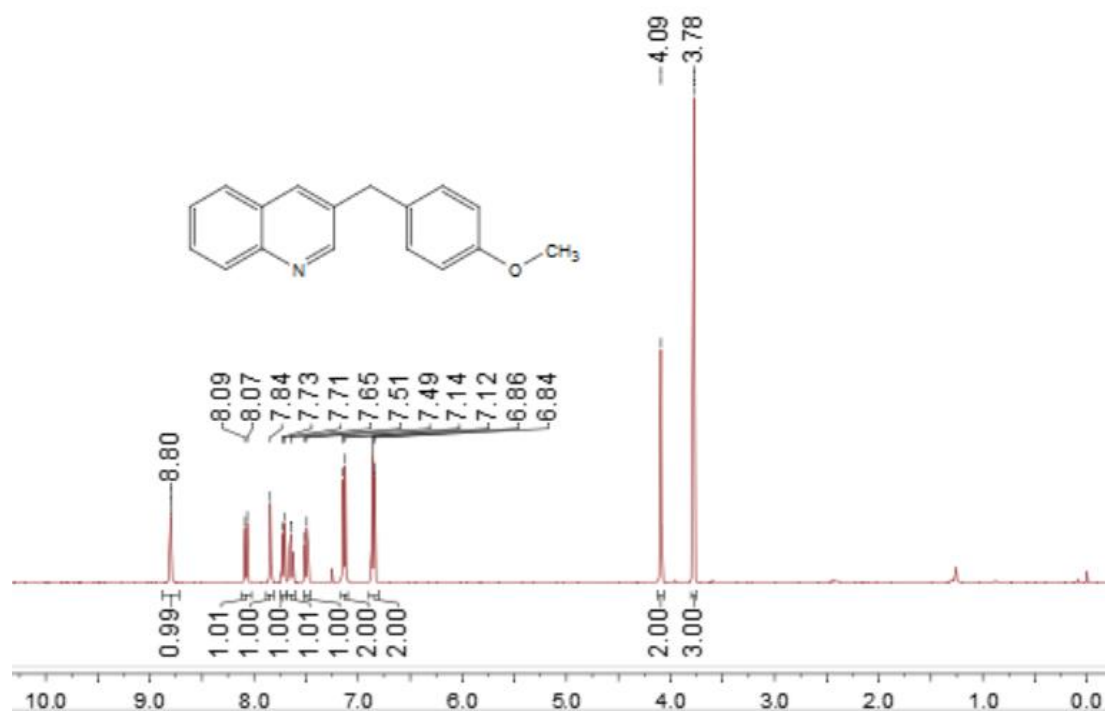

<sup>13</sup>C-NMR spectrum of 3-(4-methoxybenzyl)quinoline (3ag)

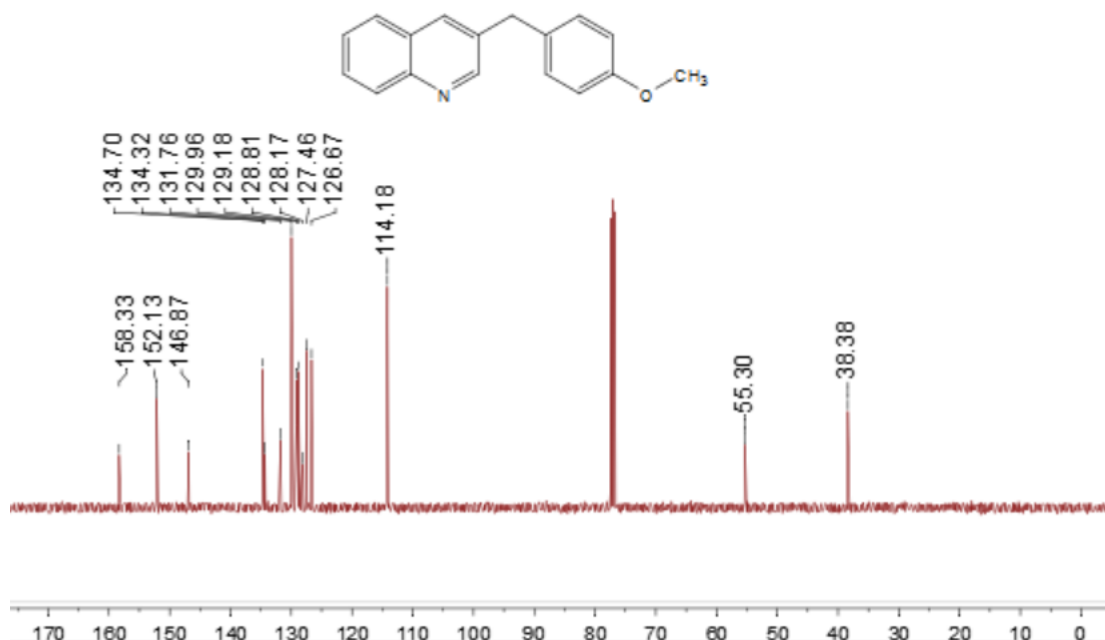

<sup>1</sup>H-NMR spectrum of 3-(3-methoxybenzyl)quinoline (3ah)

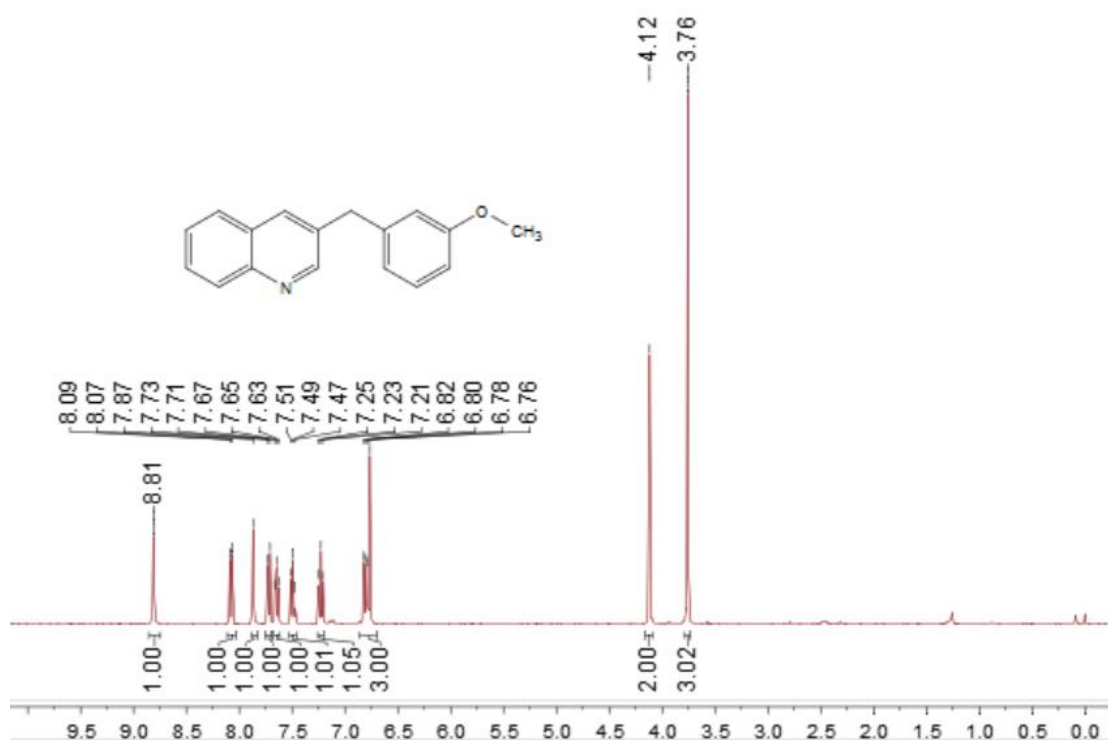

<sup>13</sup>C-NMR spectrum of 3-(3-methoxybenzyl)quinoline (3ah)

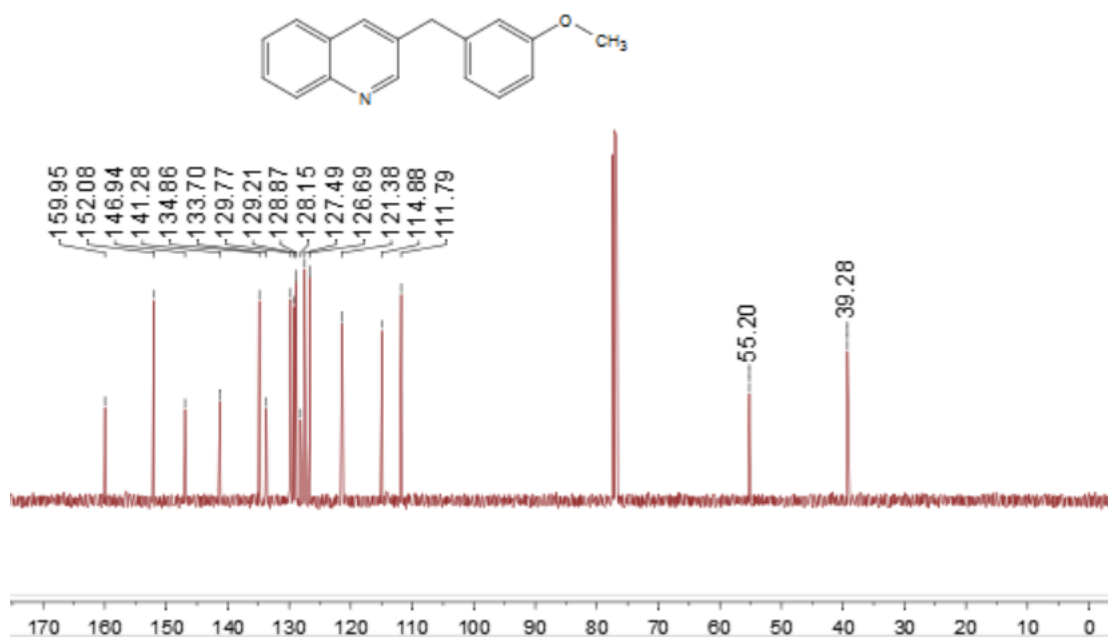

<sup>1</sup>H-NMR spectrum of 3-(2-methoxybenzyl)quinoline (3ai)

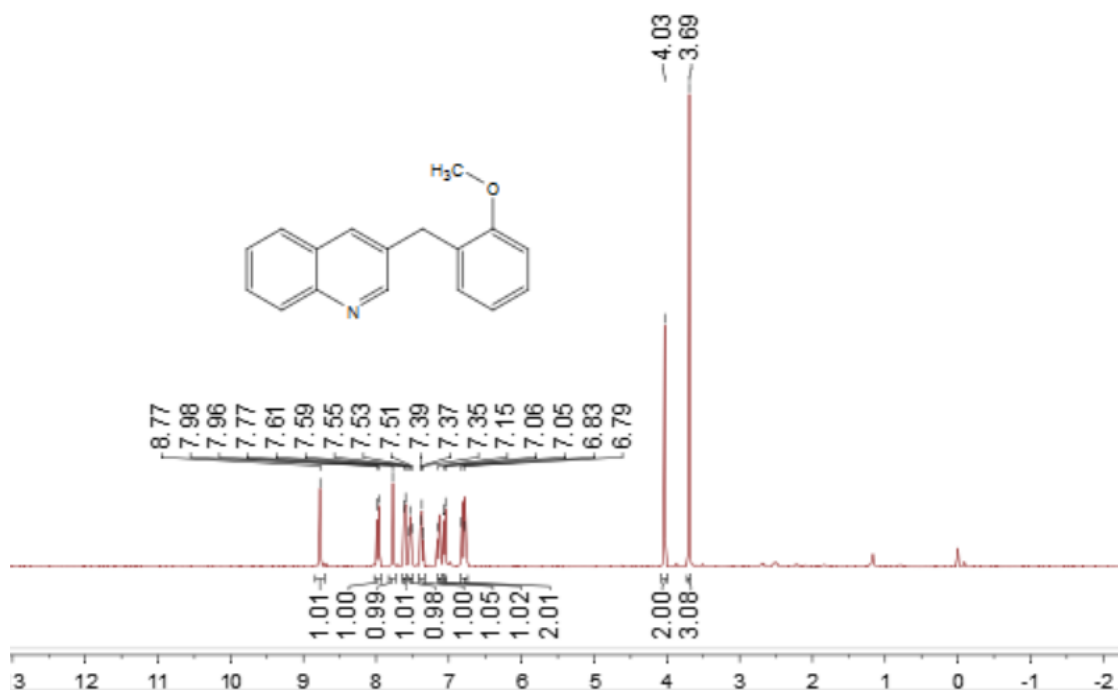

<sup>13</sup>C-NMR spectrum of 3-(2-methoxybenzyl)quinoline (3ai)

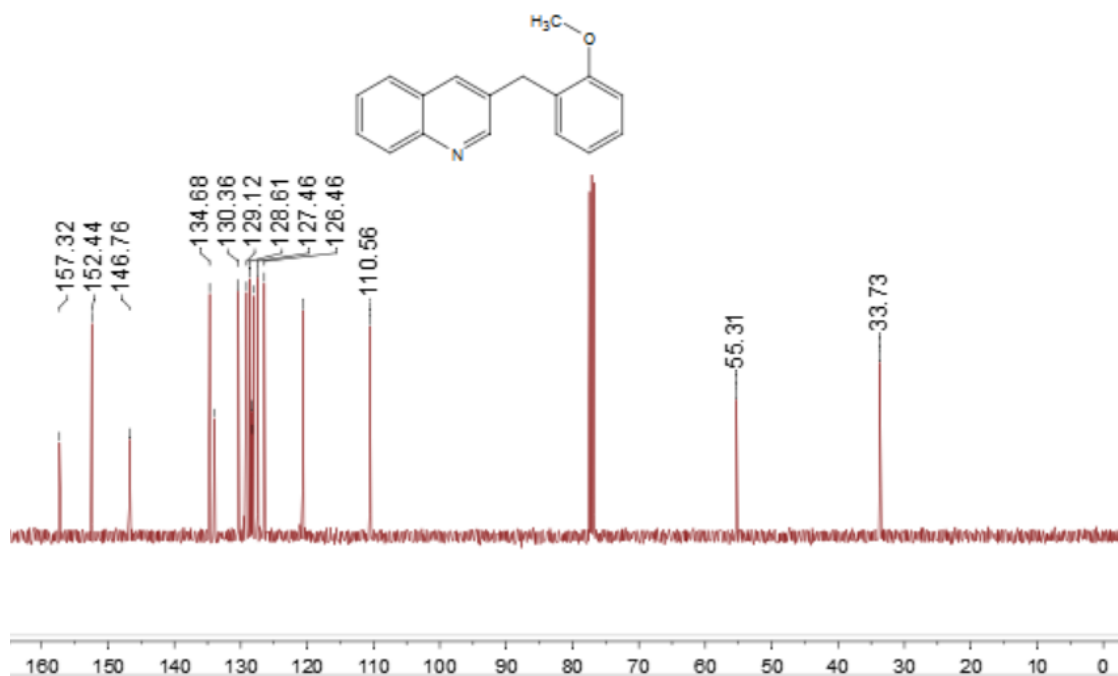

<sup>1</sup>H-NMR spectrum of N,N-dimethyl-4-(quinolin-3-ylmethyl)aniline (3aj)

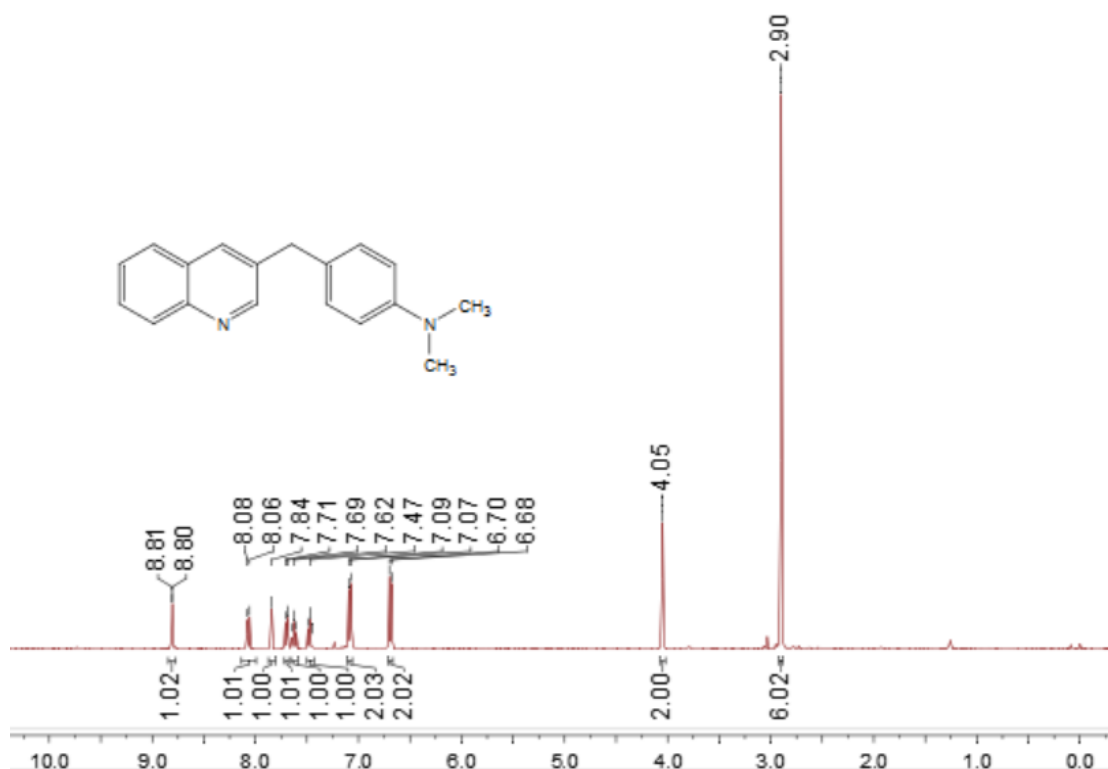

<sup>13</sup>C-NMR spectrum of N,N-dimethyl-4-(quinolin-3-ylmethyl)aniline (3aj)

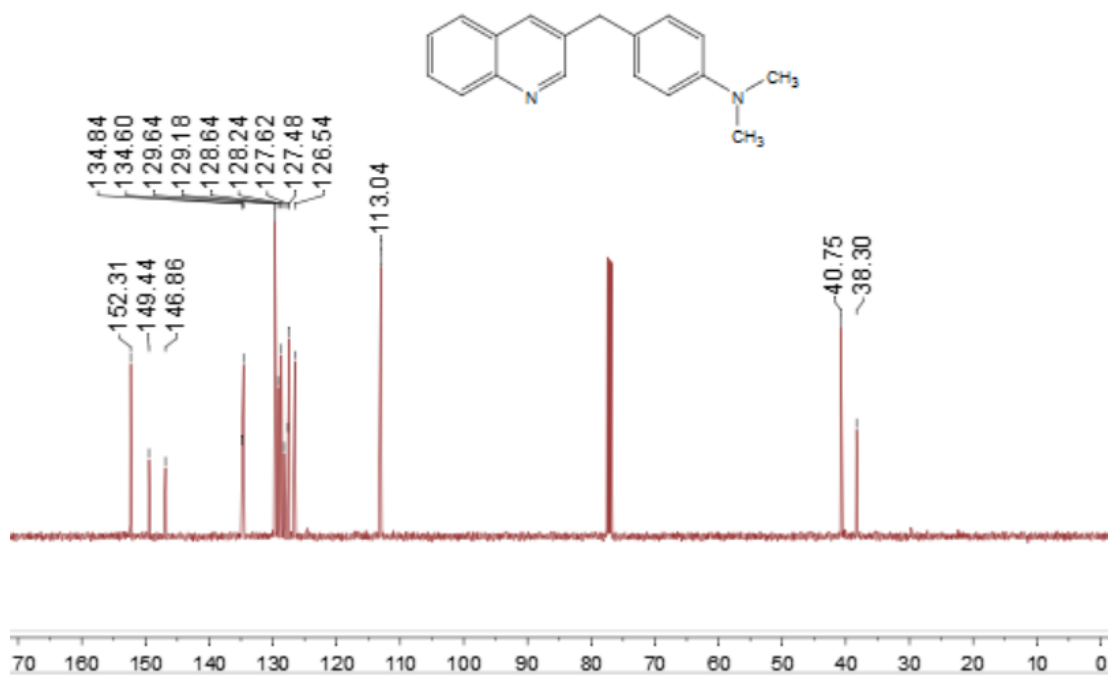

<sup>1</sup>H-NMR spectrum of 3-(naphthalen-1-ylmethyl)quinoline (3ak)

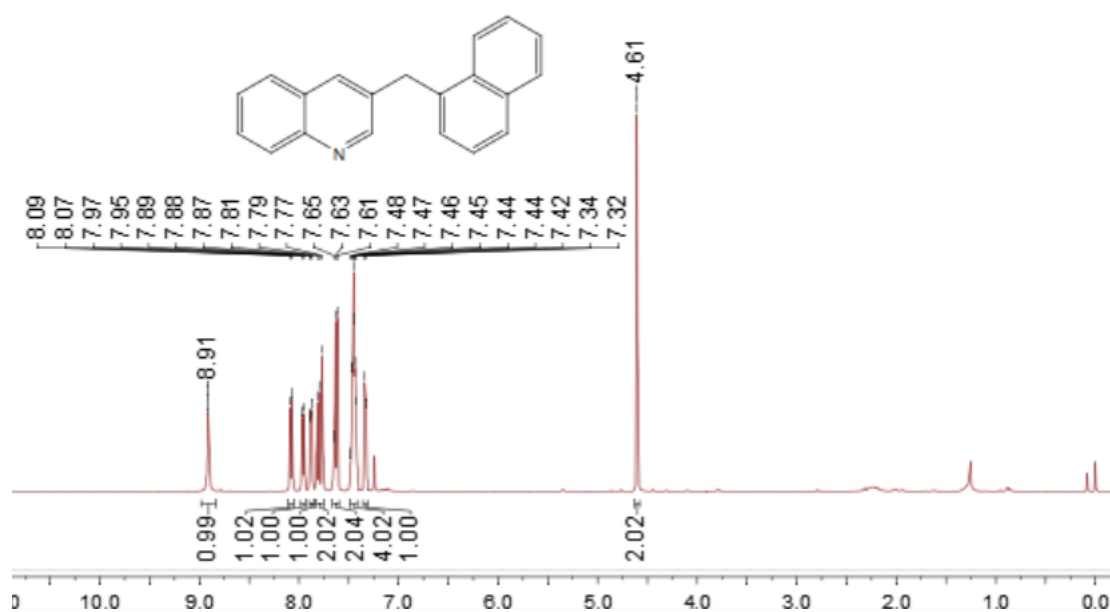

<sup>13</sup>C-NMR spectrum of 3-(naphthalen-1-ylmethyl)quinoline (3ak)

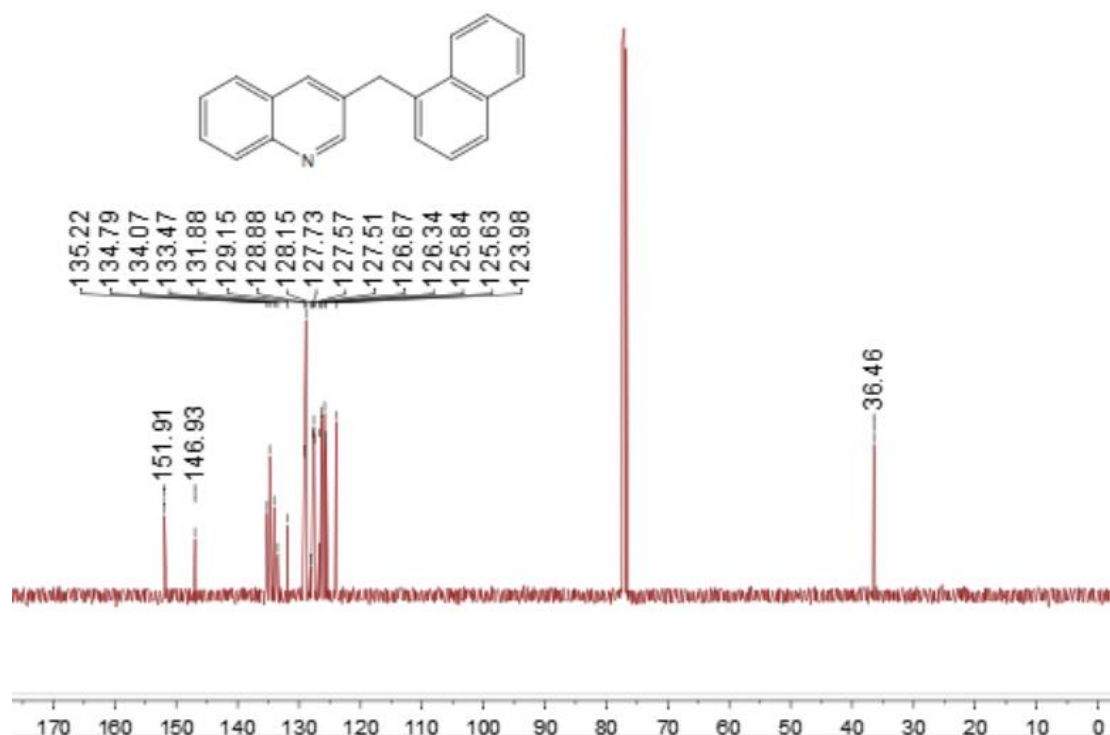

<sup>1</sup>H-NMR spectrum of 3-(pyridin-3-ylmethyl)quinoline (3a)

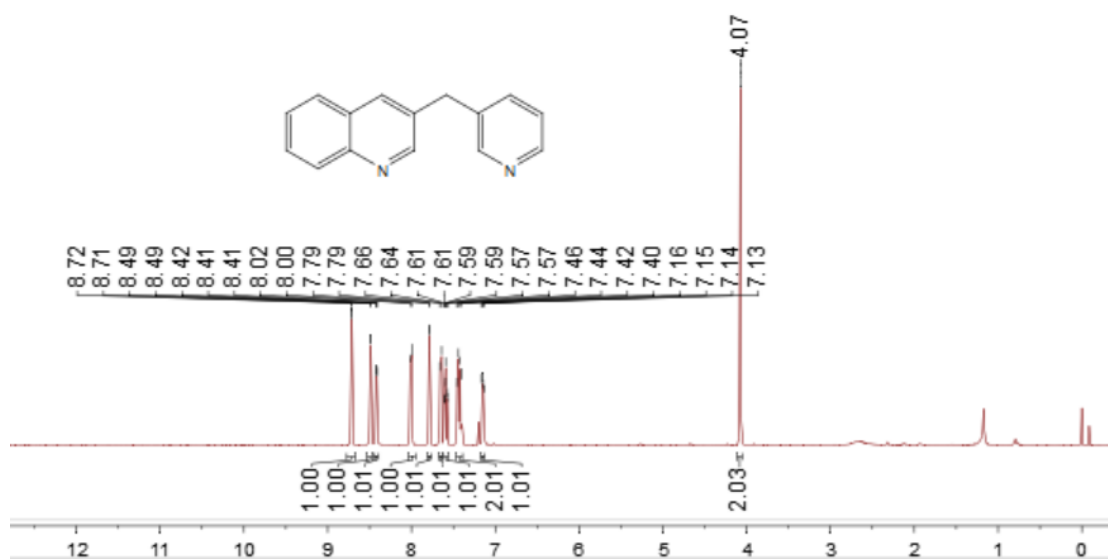

<sup>13</sup>C-NMR spectrum of 3-(pyridin-3-ylmethyl)quinoline (3a)

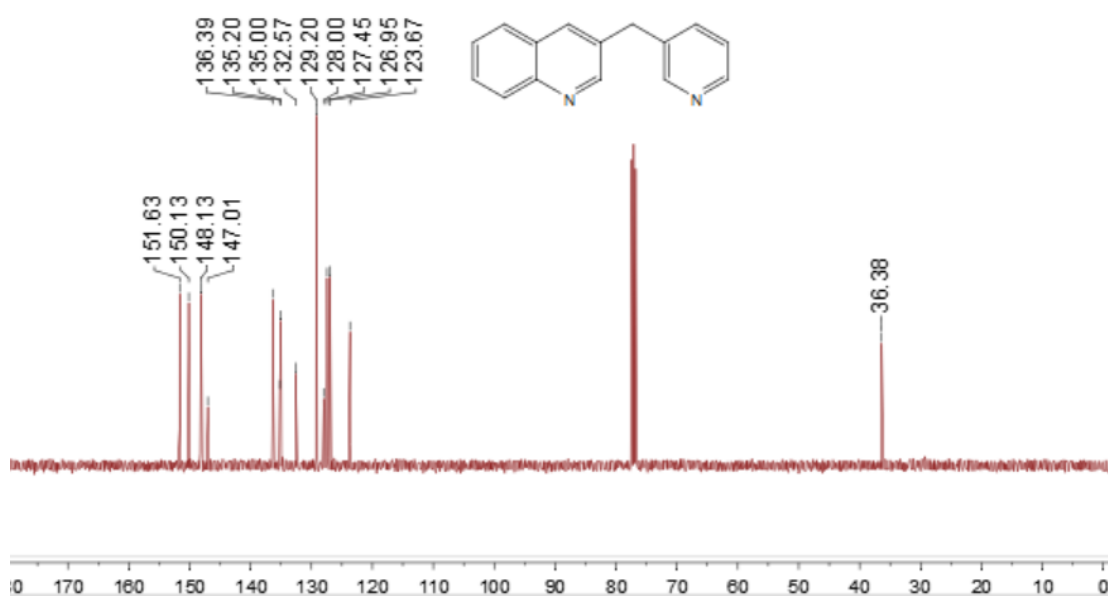

<sup>1</sup>H-NMR spectrum of 3-(furan-2-ylmethyl)quinoline (3am)

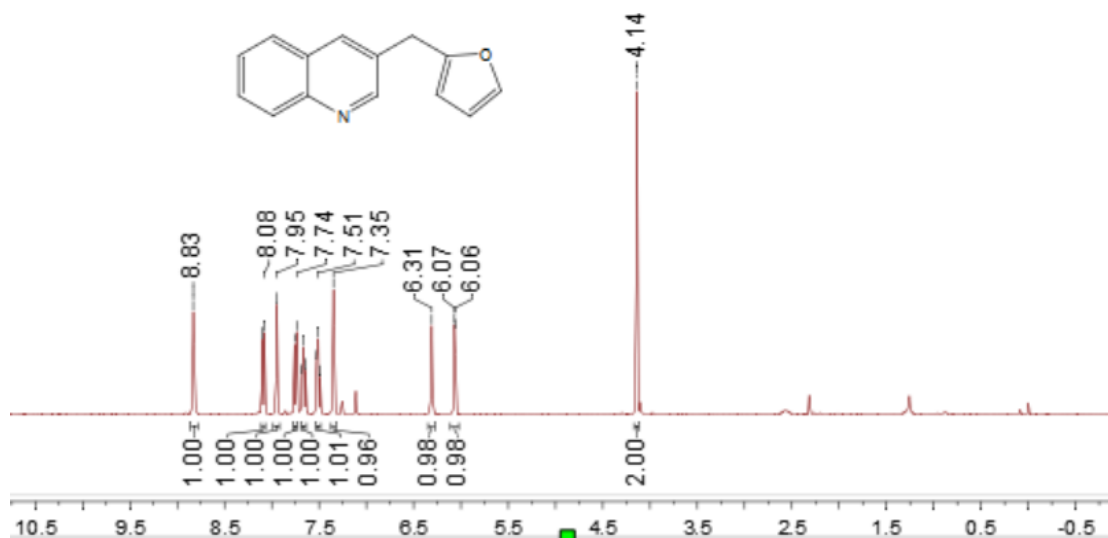

<sup>13</sup>C-NMR spectrum of 3-(furan-2-ylmethyl)quinoline (3am)

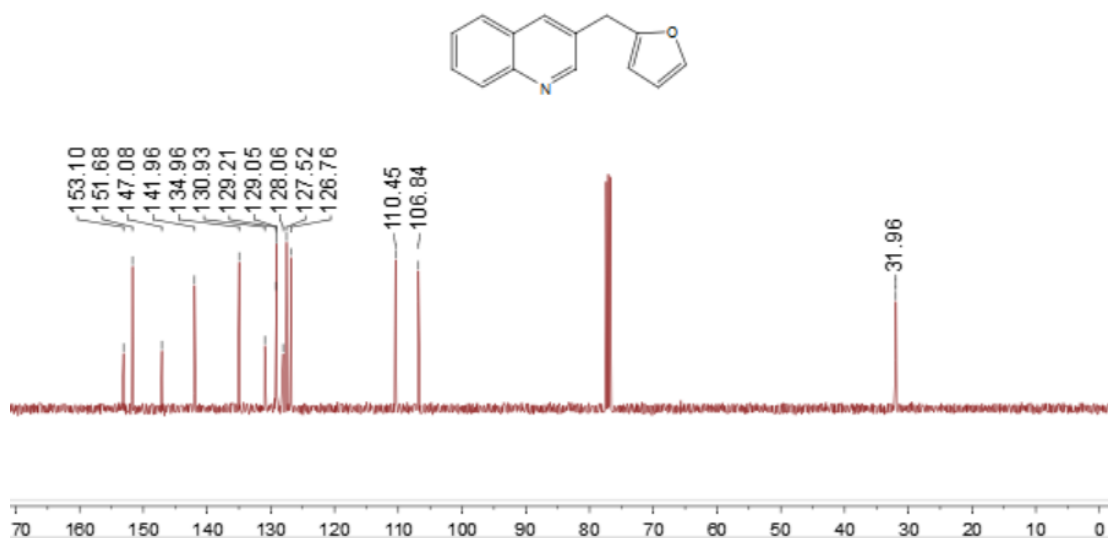



<sup>1</sup>H-NMR spectrum of 3-(thiophen-2-ylmethyl)quinoline (3an)

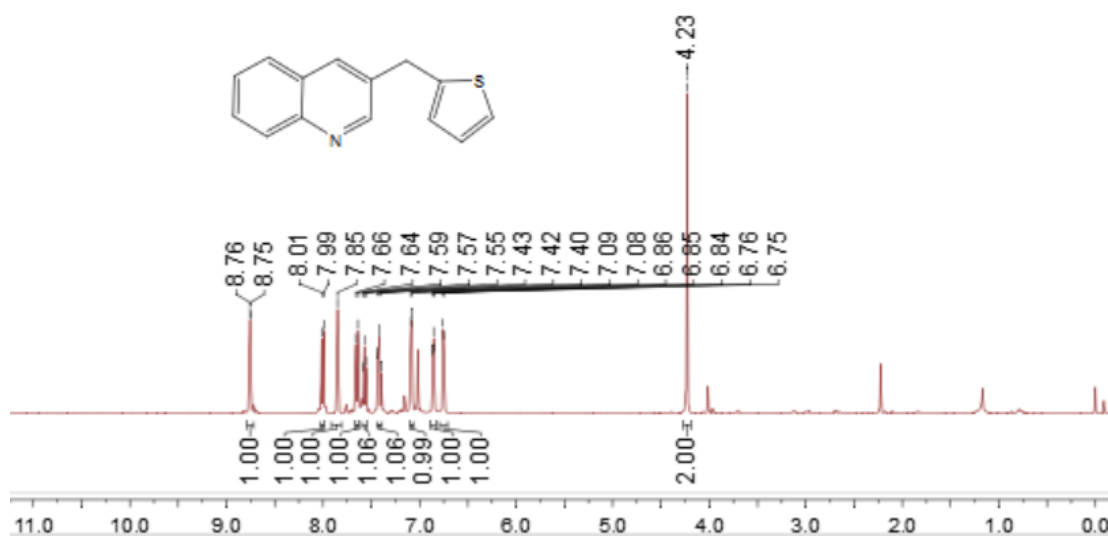

<sup>13</sup>C-NMR spectrum of 3-(thiophen-2-ylmethyl)quinoline (3an)

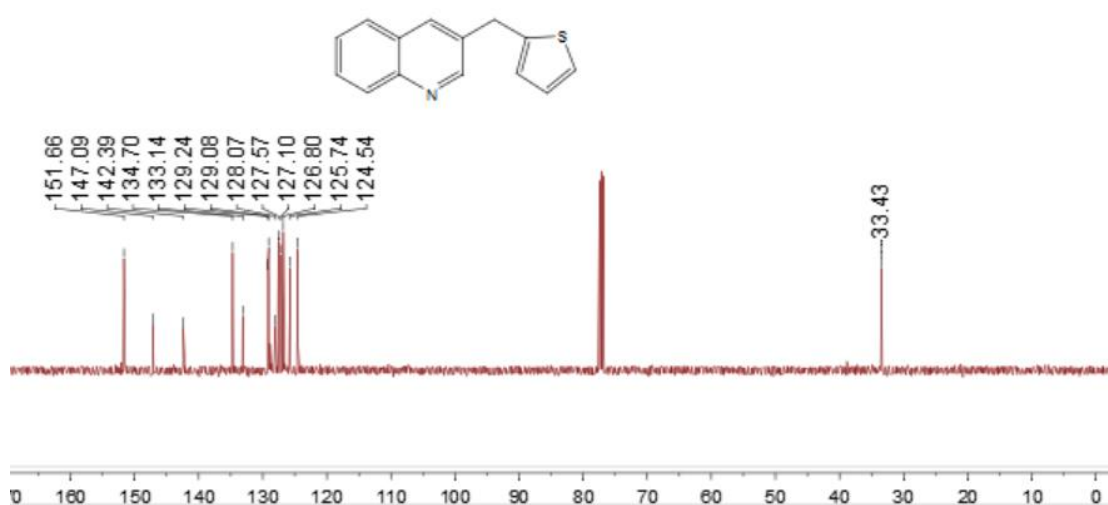

<sup>1</sup>H-NMR spectrum of 3-(4-chlorobenzyl)-6-methylquinoline (3bb)

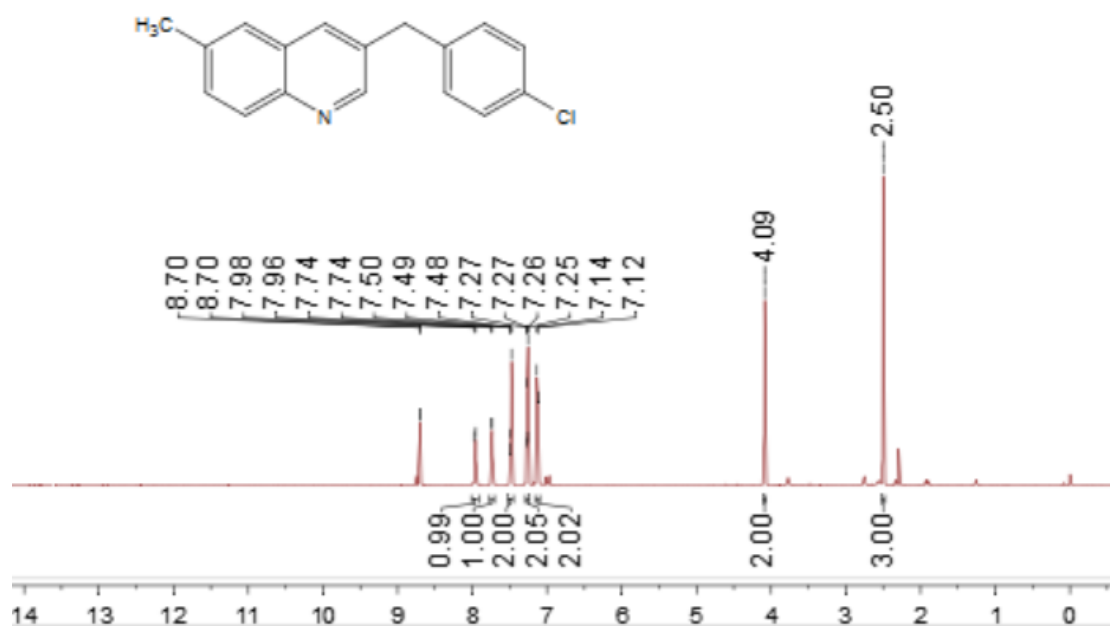

<sup>13</sup>C-NMR spectrum of 3-(4-chlorobenzyl)-6-methylquinoline (3bb)

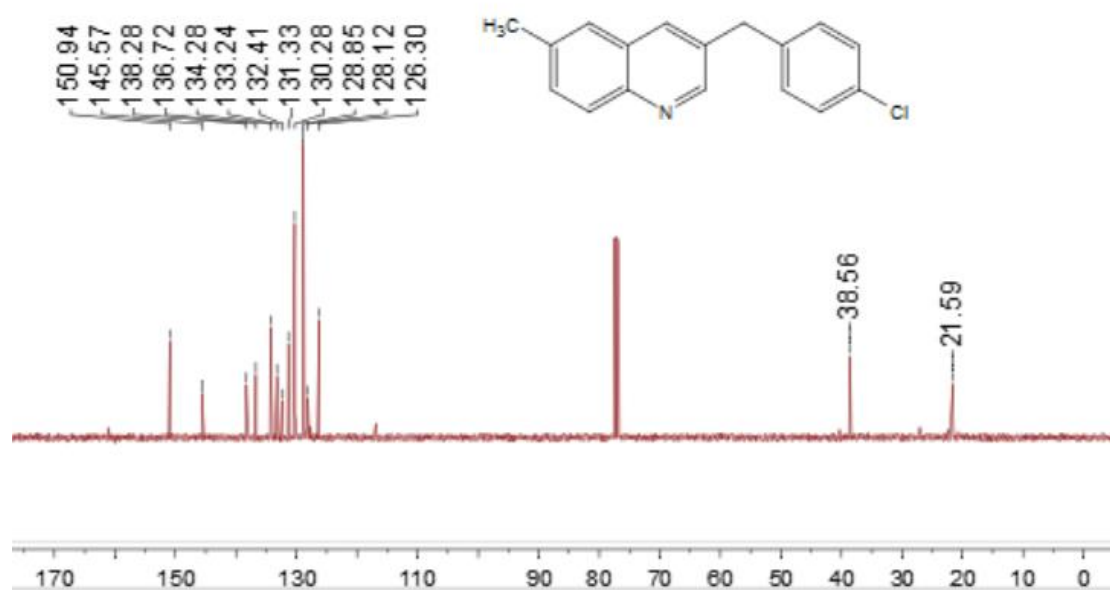

<sup>1</sup>H-NMR spectrum of 6-methyl-3-(4-methylbenzyl)quinoline (3bf)

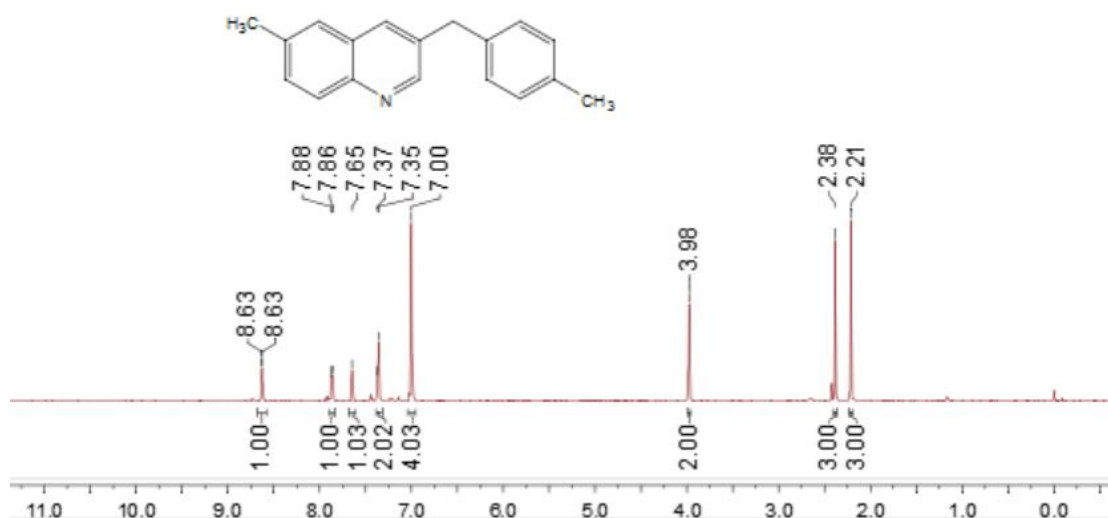

<sup>13</sup>C-NMR spectrum of 6-methyl-3-(4-methylbenzyl)quinoline (3bf)

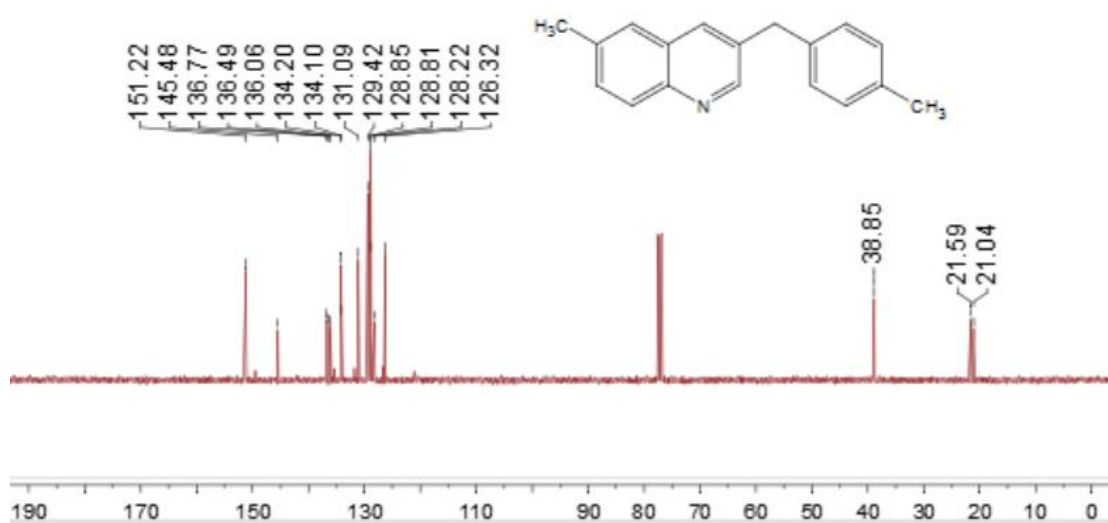

<sup>1</sup>H-NMR spectrum of 6-methyl-3-(pyridin-3-ylmethyl)quinoline (3bl)

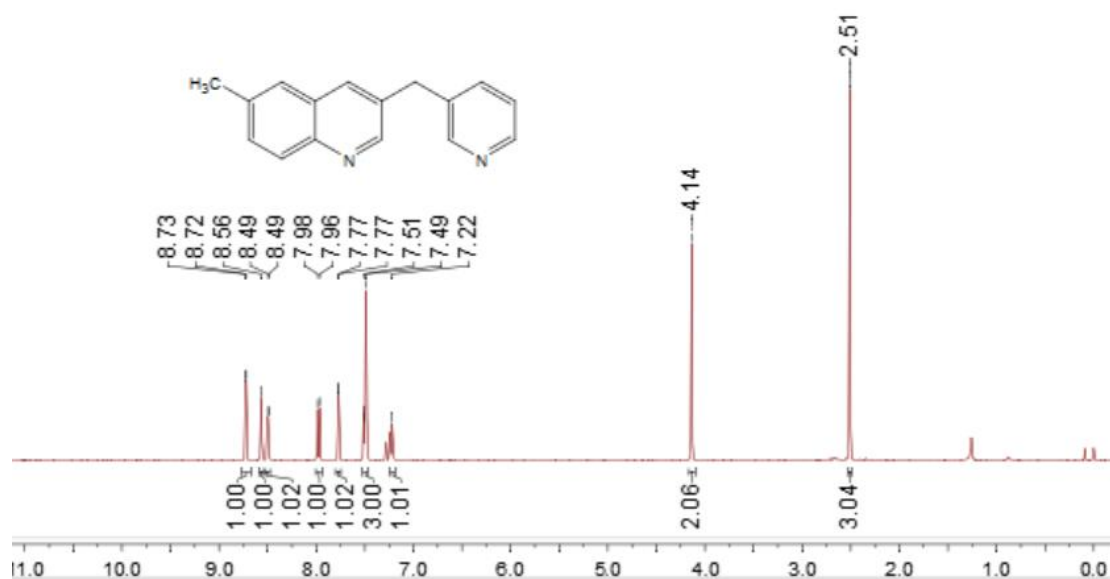

<sup>13</sup>C-NMR spectrum of 6-methyl-3-(pyridin-3-ylmethyl)quinoline (3bl)

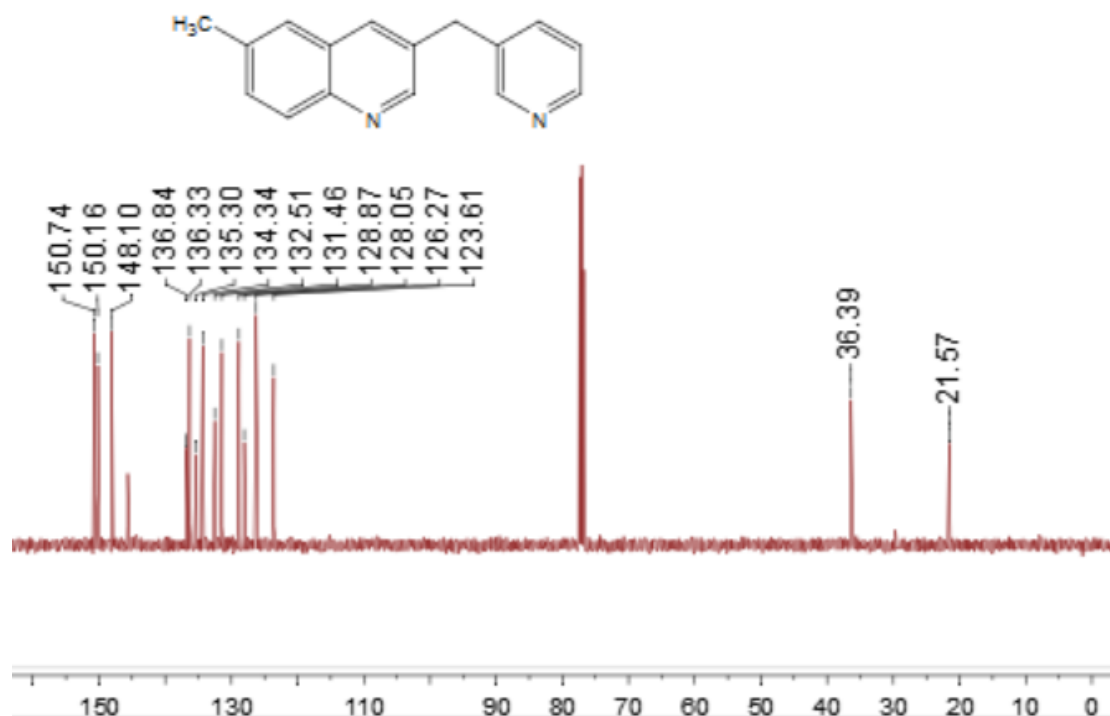

<sup>1</sup>H-NMR spectrum of 3-benzyl-8-methylquinoline (3da)

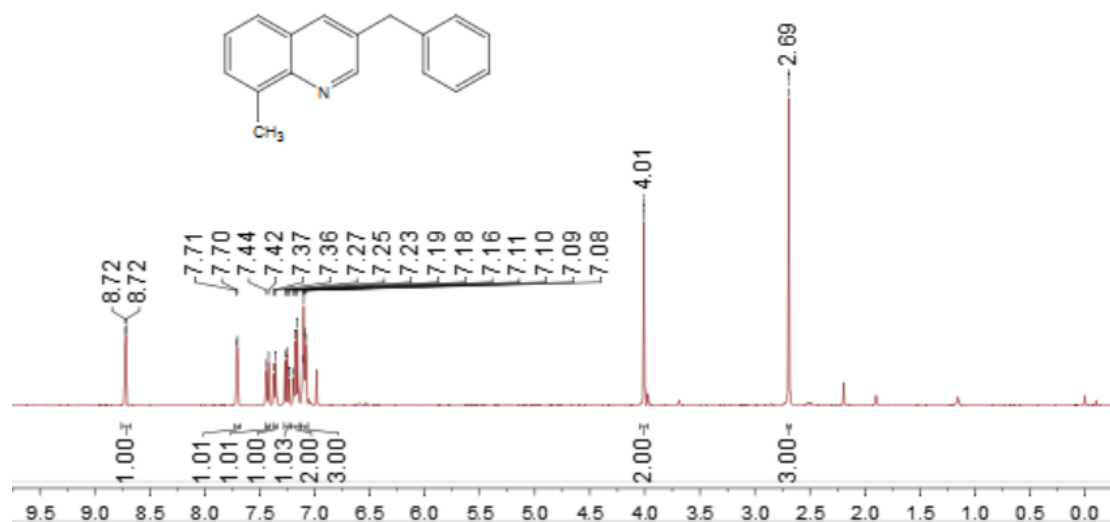

<sup>13</sup>C-NMR spectrum of 3-benzyl-8-methylquinoline (3da)

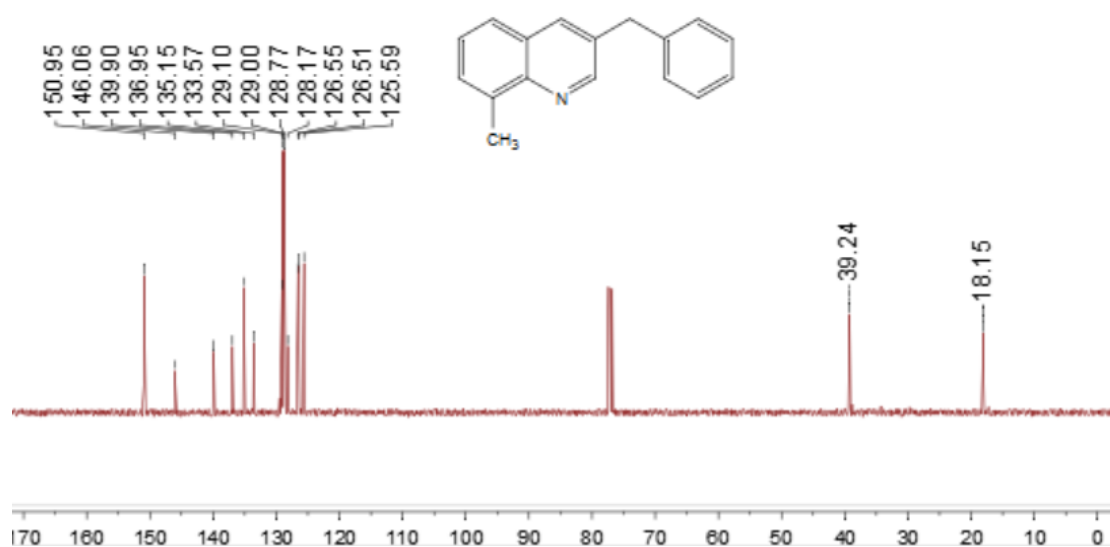

<sup>1</sup>H-NMR spectrum of 8-methyl-3-(4-methylbenzyl)quinoline (3df)

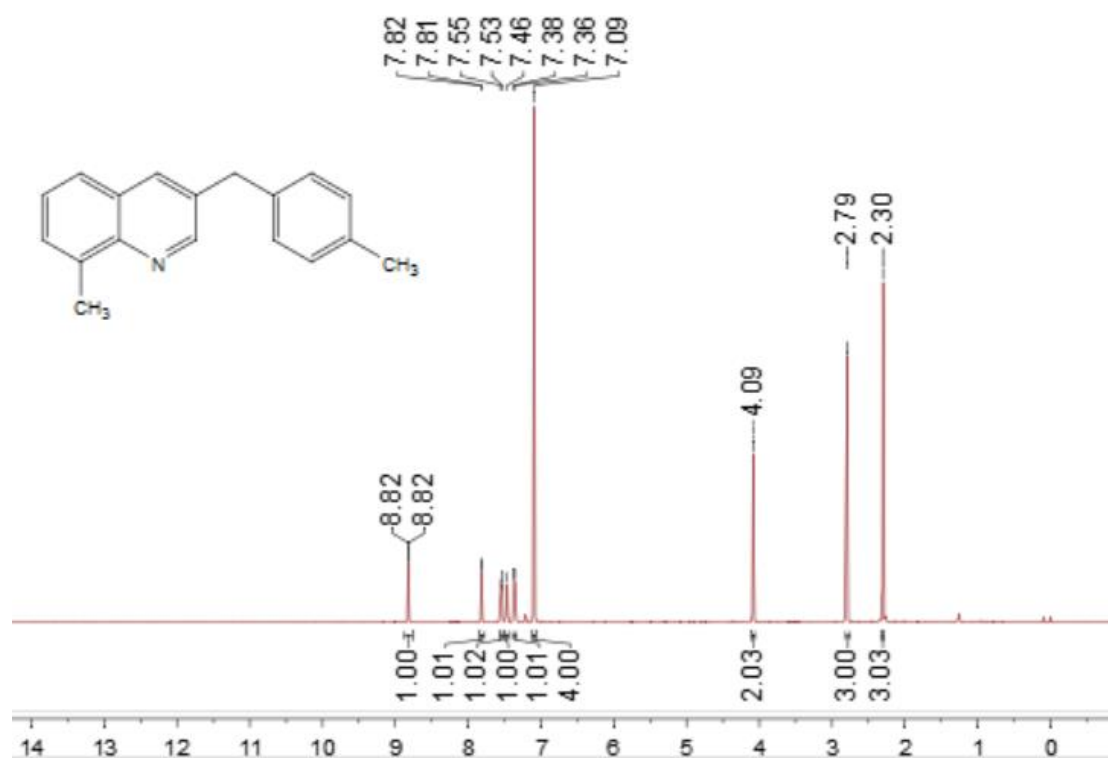

<sup>13</sup>C-NMR spectrum of 8-methyl-3-(4-methylbenzyl)quinoline (3df)

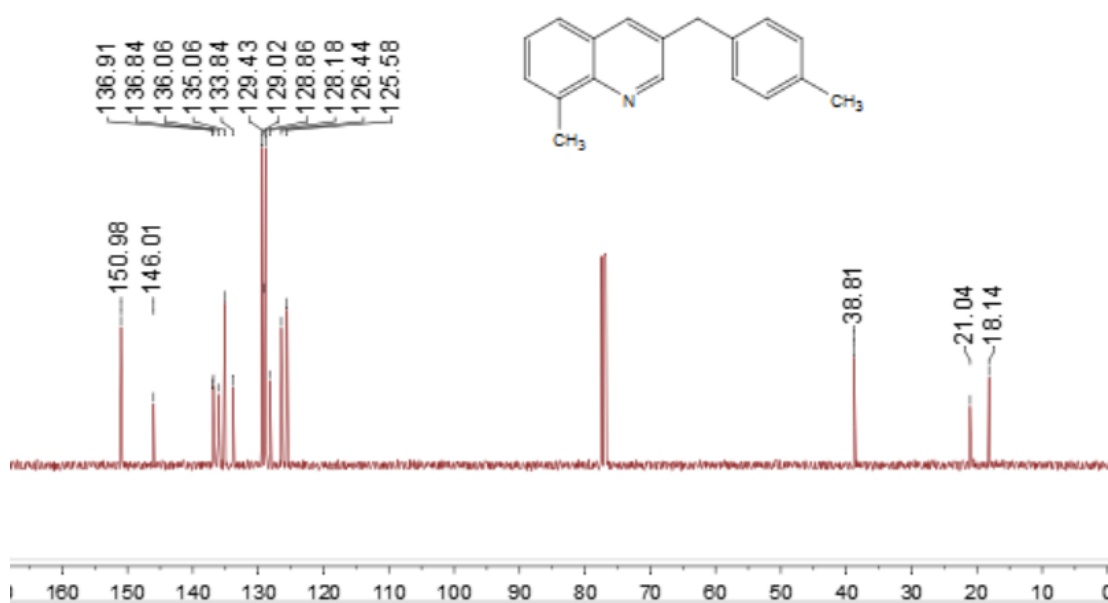

<sup>1</sup>H-NMR spectrum of 3-(4-chlorobenzyl)-8-methylquinoline (3db)

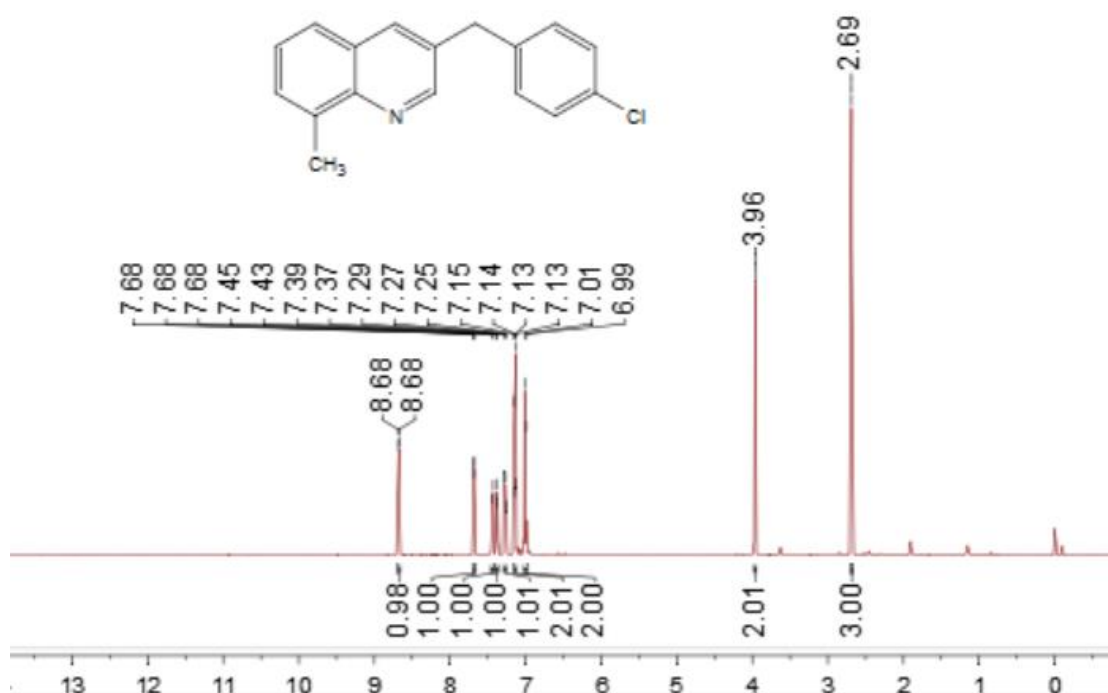

<sup>13</sup>C-NMR spectrum of 3-(4-chlorobenzyl)-8-methylquinoline (3db)

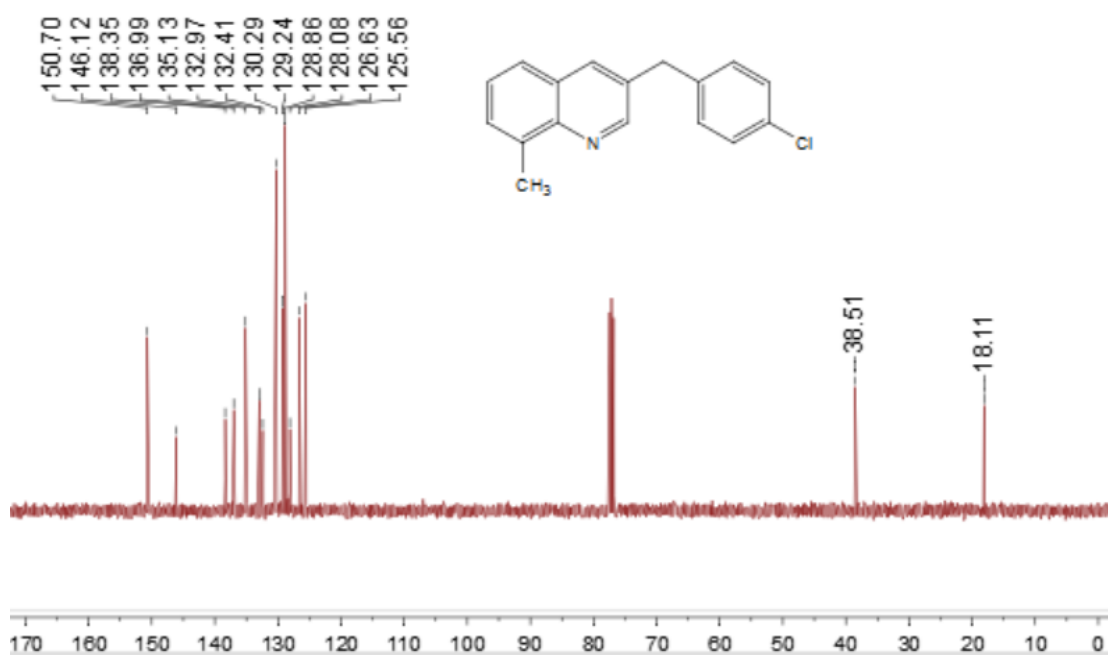

<sup>1</sup>H-NMR spectrum of 8-methyl-3-(4-(methylsulfonyl)benzyl)quinoline (3dd)

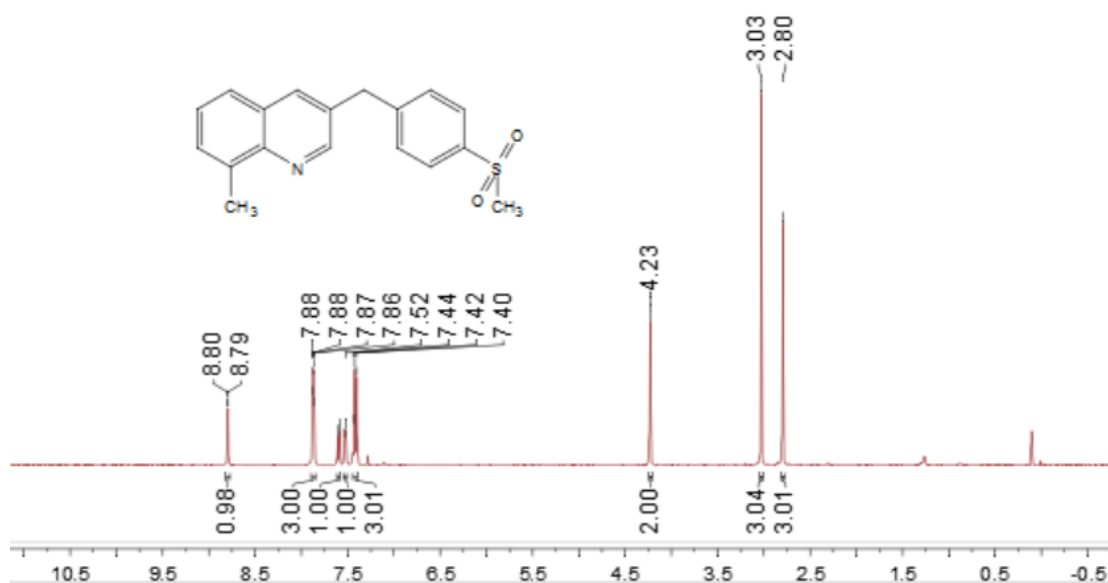

<sup>13</sup>C-NMR spectrum of 8-methyl-3-(4-(methylsulfonyl)benzyl)quinoline (3dd)

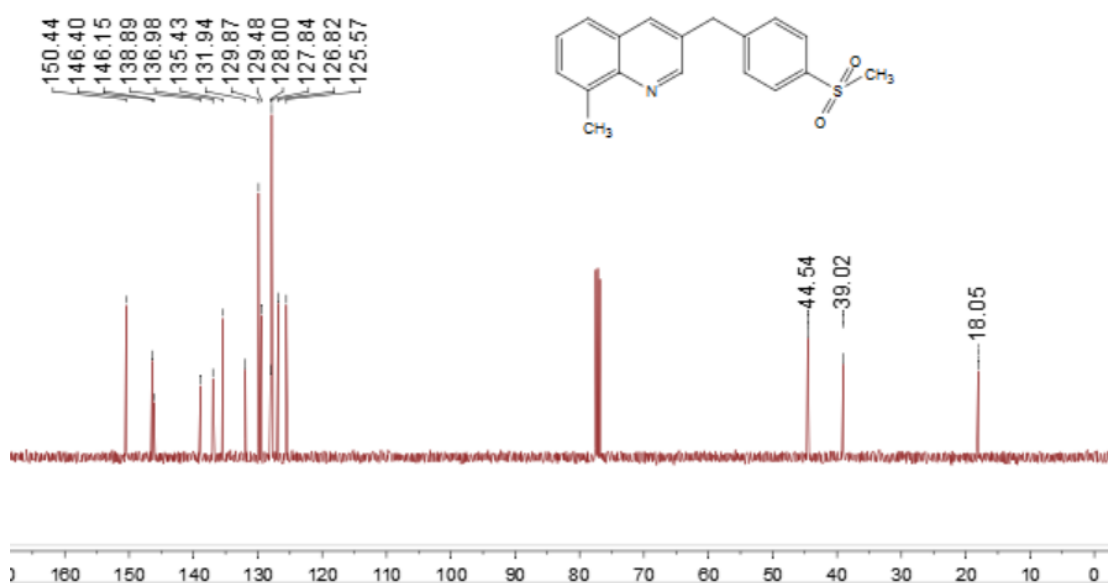



<sup>1</sup>H-NMR spectrum of 8-methyl-3-(4-(trifluoromethyl)benzyl)quinoline (3do)

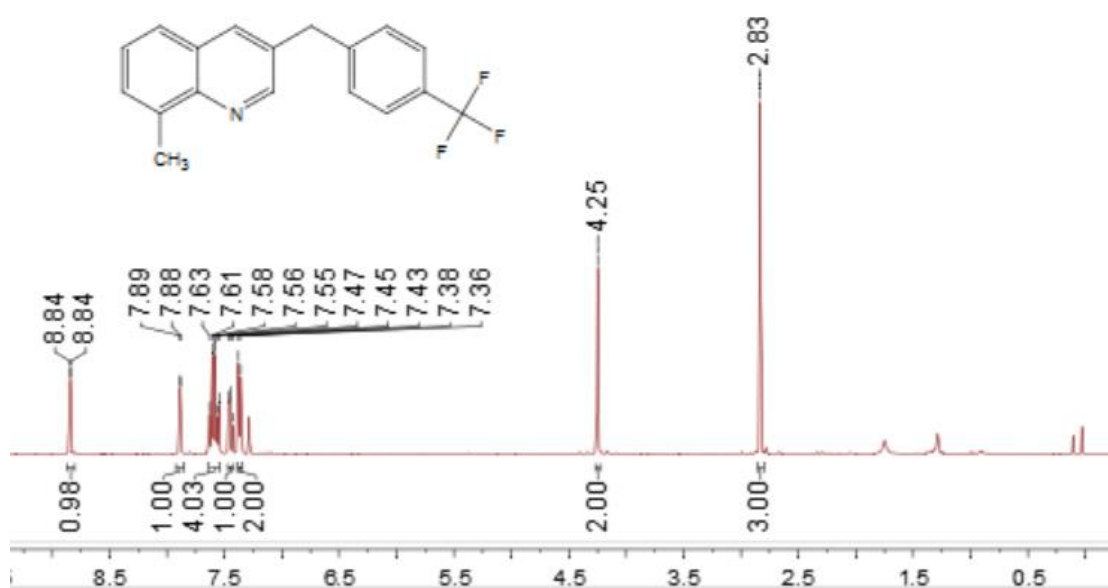

<sup>13</sup>C-NMR spectrum of 8-methyl-3-(4-(trifluoromethyl)benzyl)quinoline (3do)

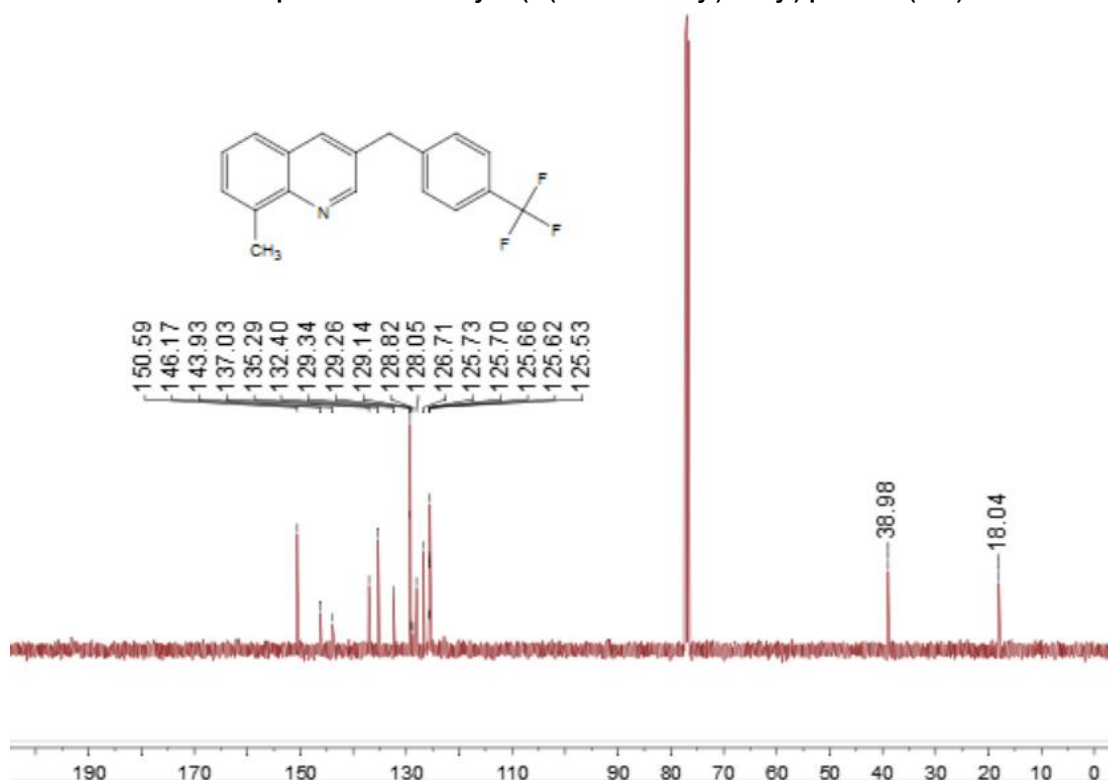

<sup>1</sup>H-NMR spectrum of 8-methyl-3-(pyridin-3-ylmethyl)quinoline (3dl)

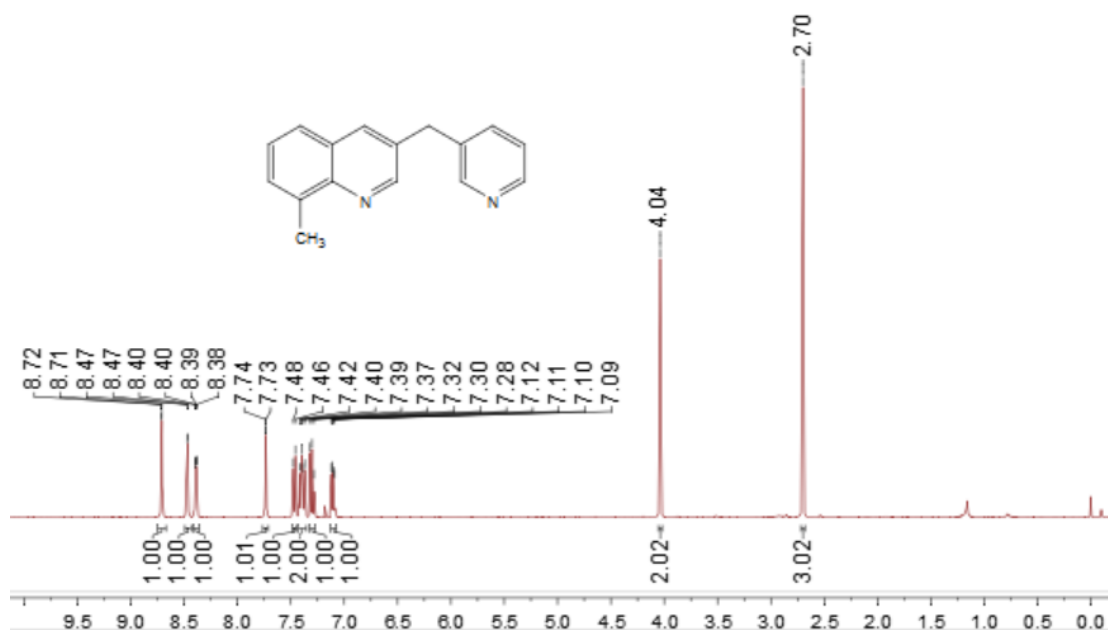

<sup>13</sup>C-NMR spectrum of 8-methyl-3-(pyridin-3-ylmethyl)quinoline (3dl)

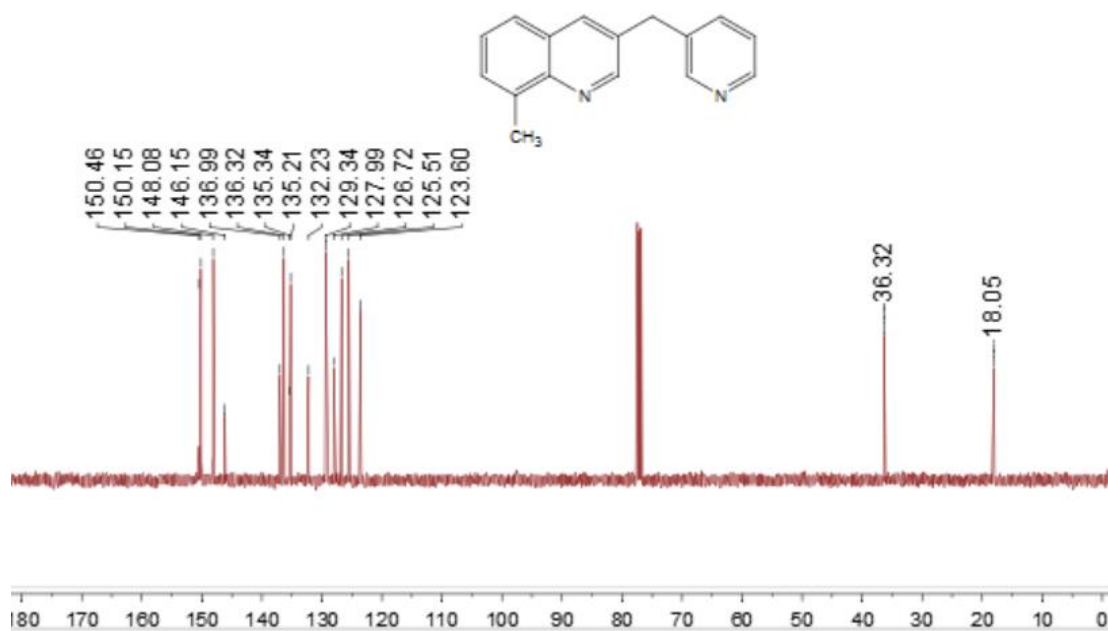

<sup>1</sup>H-NMR spectrum of 3-heptyl-8-methylquinoline (3dp)

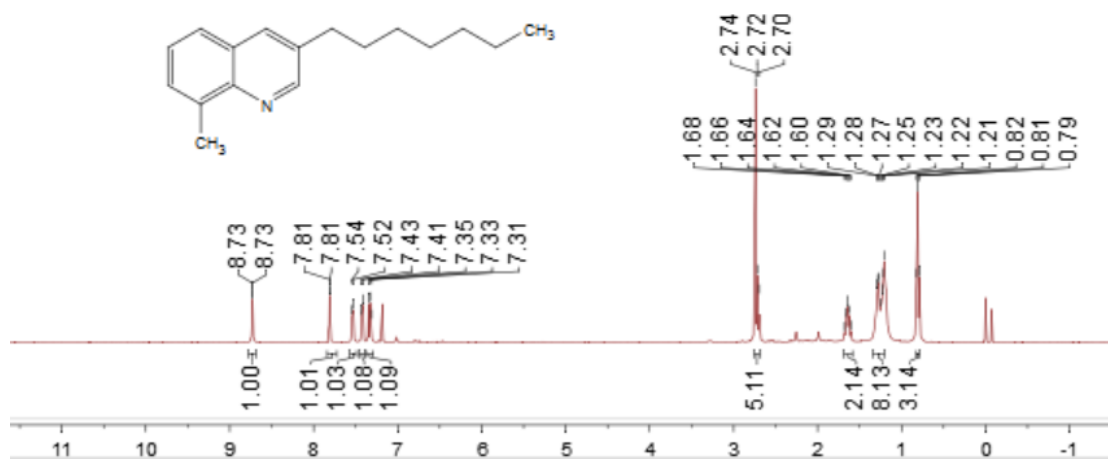

<sup>13</sup>C-NMR spectrum of 3-heptyl-8-methylquinoline (3dp)

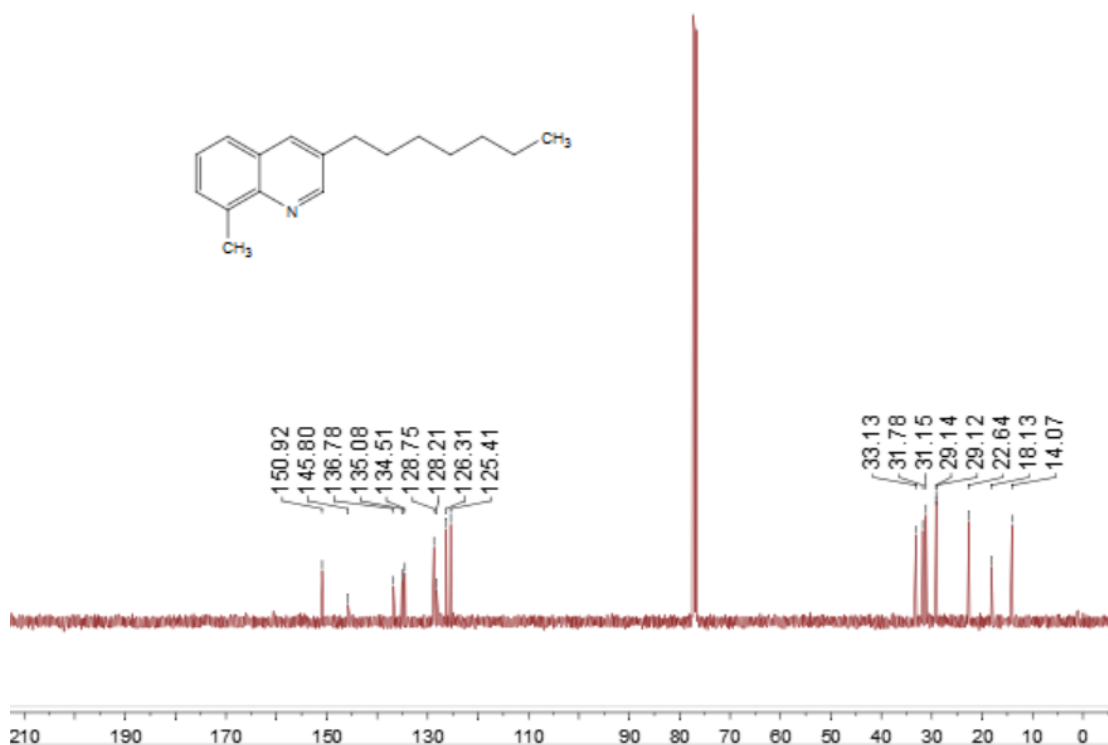

<sup>1</sup>H-NMR spectrum of 3-(cyclohexylmethyl)-8-methylquinoline (3dq)

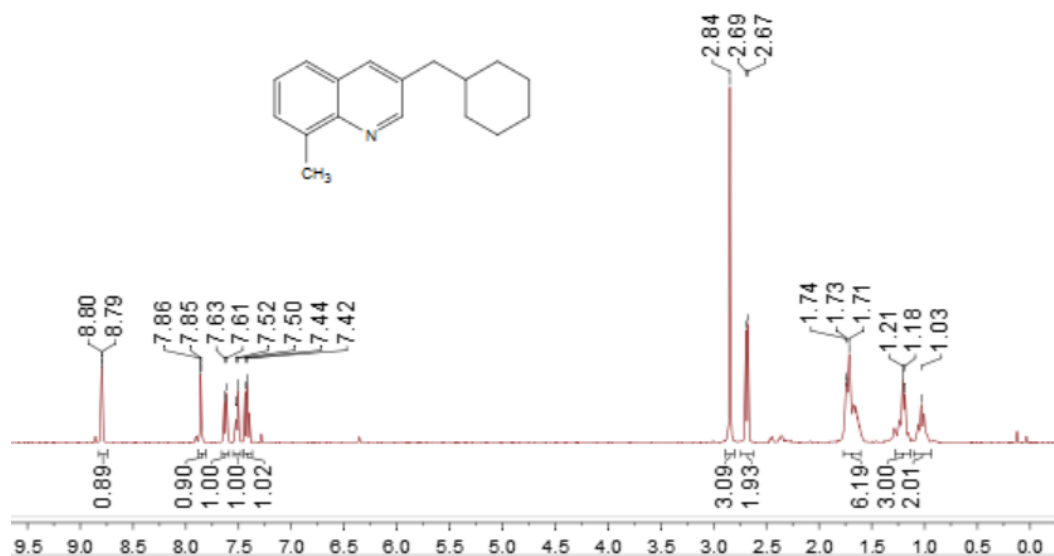

<sup>13</sup>C-NMR spectrum of 3-(cyclohexylmethyl)-8-methylquinoline (3dq)

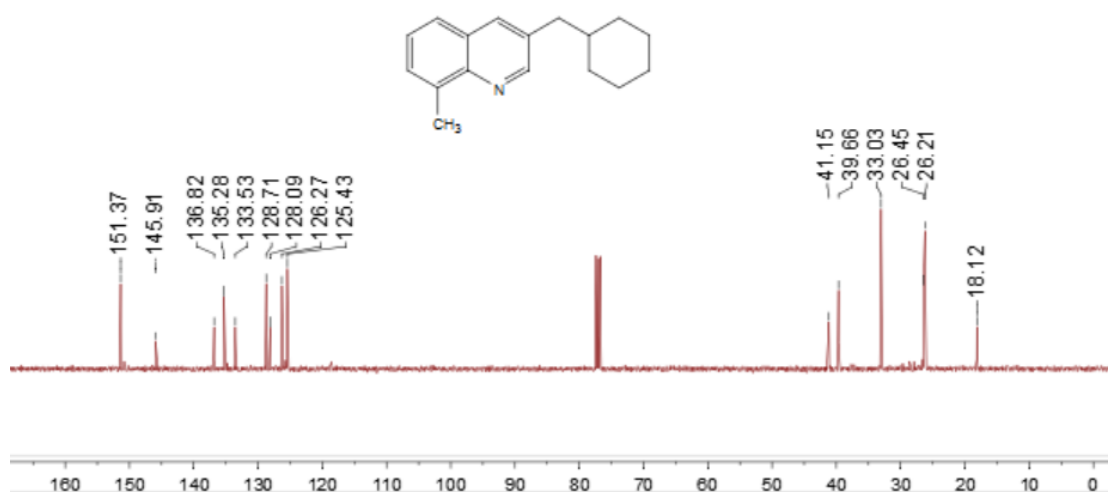

<sup>1</sup>H-NMR spectrum of 6-chloro-3-(4-chlorobenzyl)quinoline (3cb)

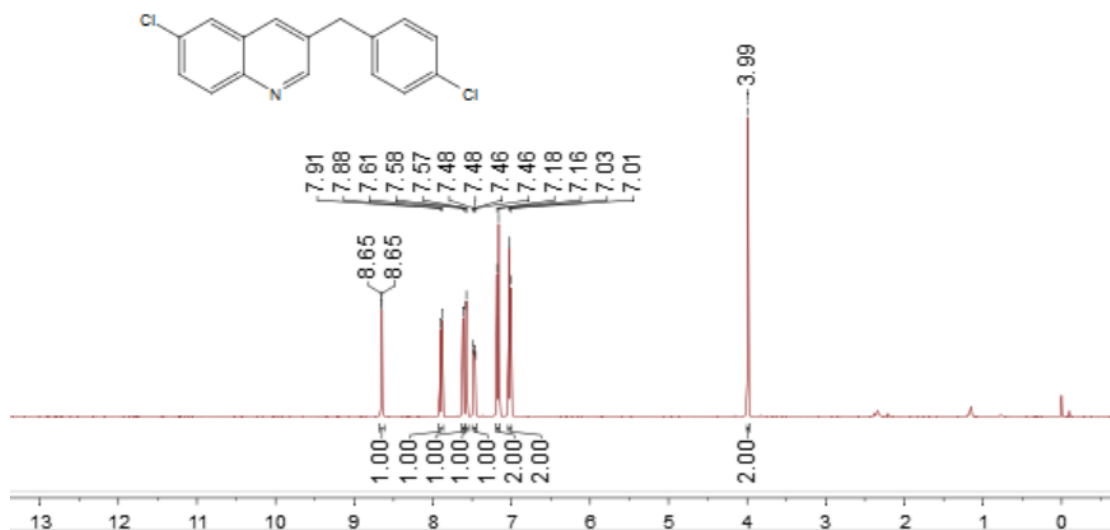

<sup>13</sup>C-NMR spectrum of 6-chloro-3-(4-chlorobenzyl)quinoline (3cb)

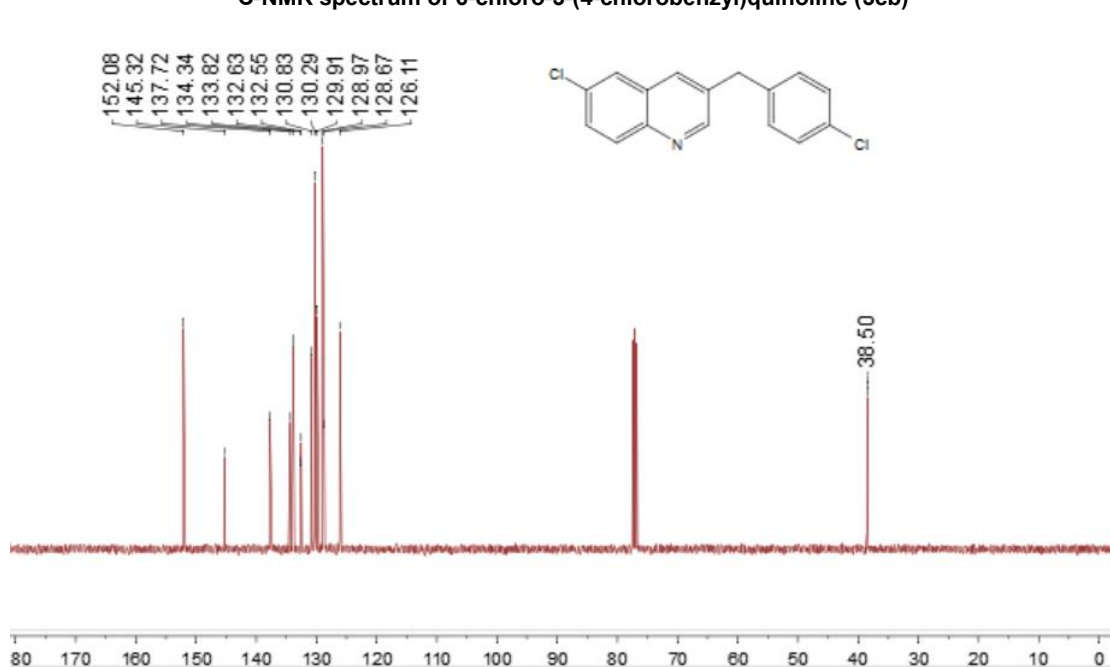

<sup>1</sup>H-NMR spectrum of methyl 3-(4-chlorobenzyl)quinoline-6-carboxylate (3eb)

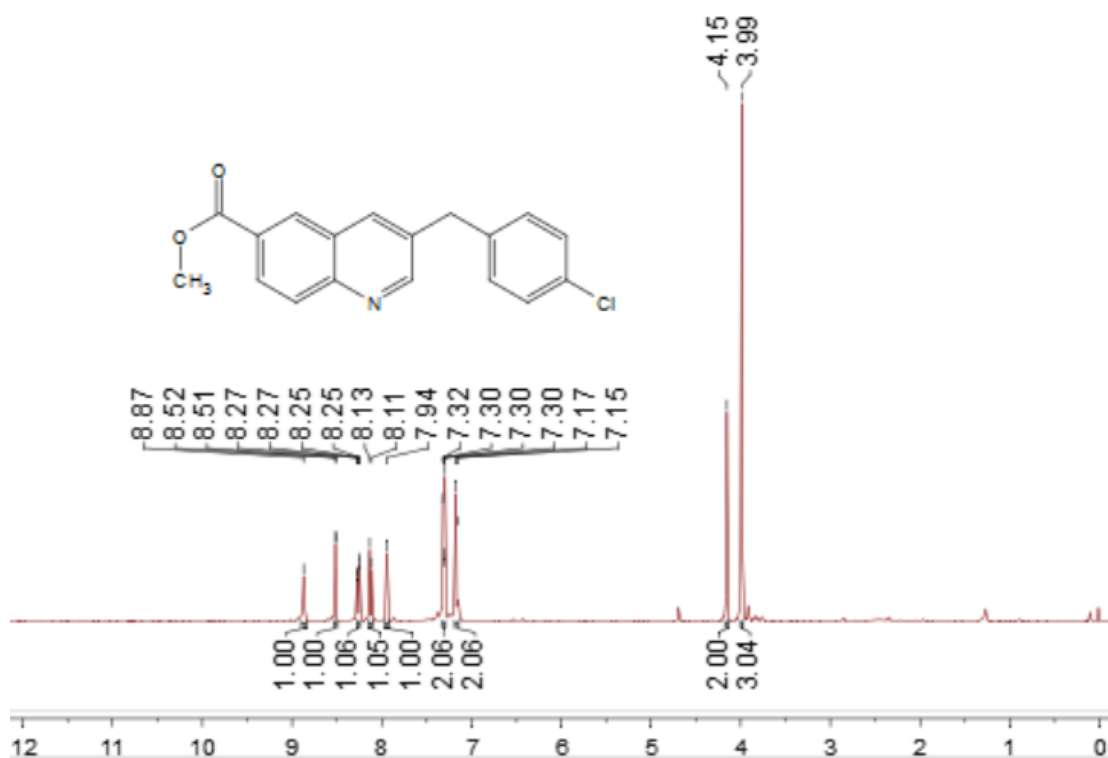

<sup>13</sup>C-NMR spectrum of methyl 3-(4-chlorobenzyl)quinoline-6-carboxylate (3eb)

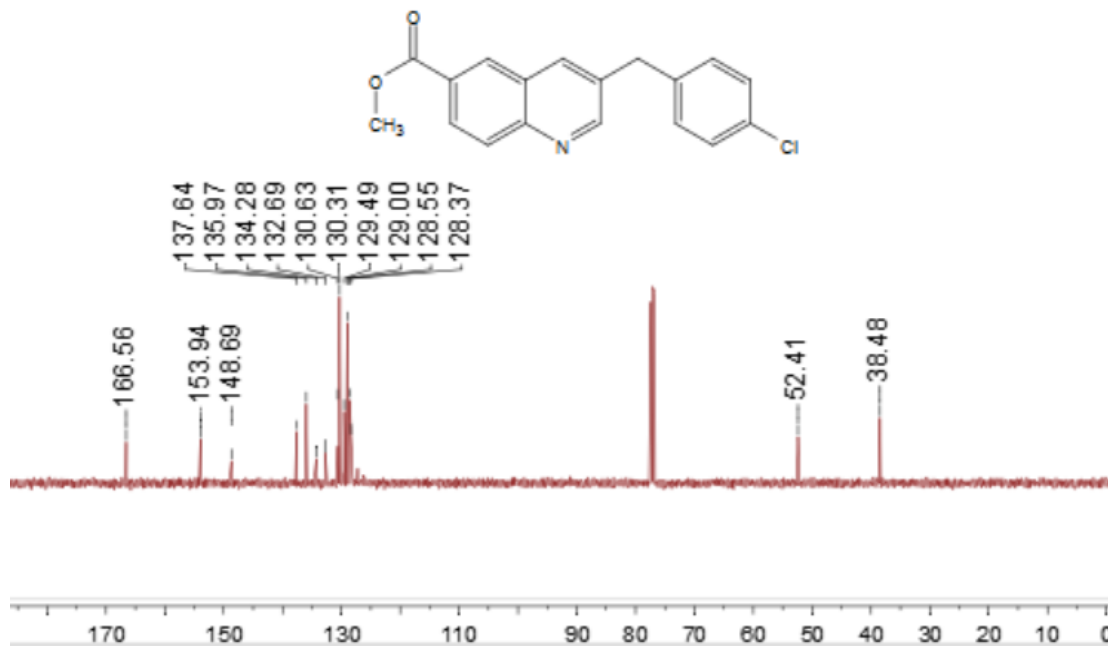

<sup>1</sup>H-NMR spectrum of 3-(4-chlorobenzyl)benzo[h]quinoline (3fb)

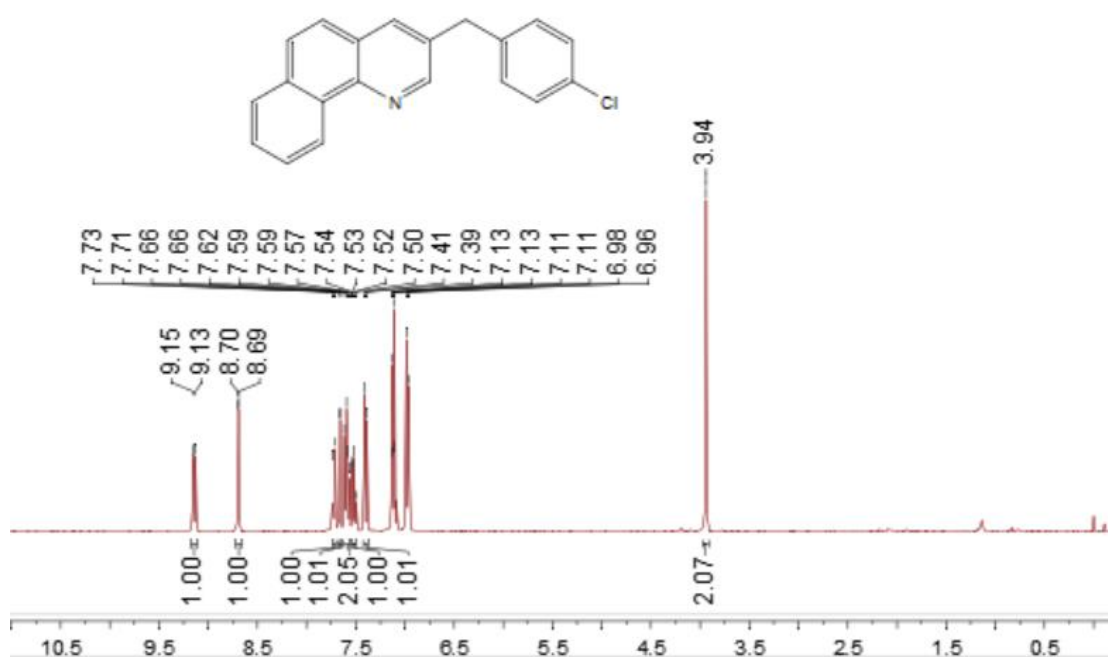

<sup>13</sup>C-NMR spectrum of 3-(4-chlorobenzyl)benzo[h]quinoline (3fb)

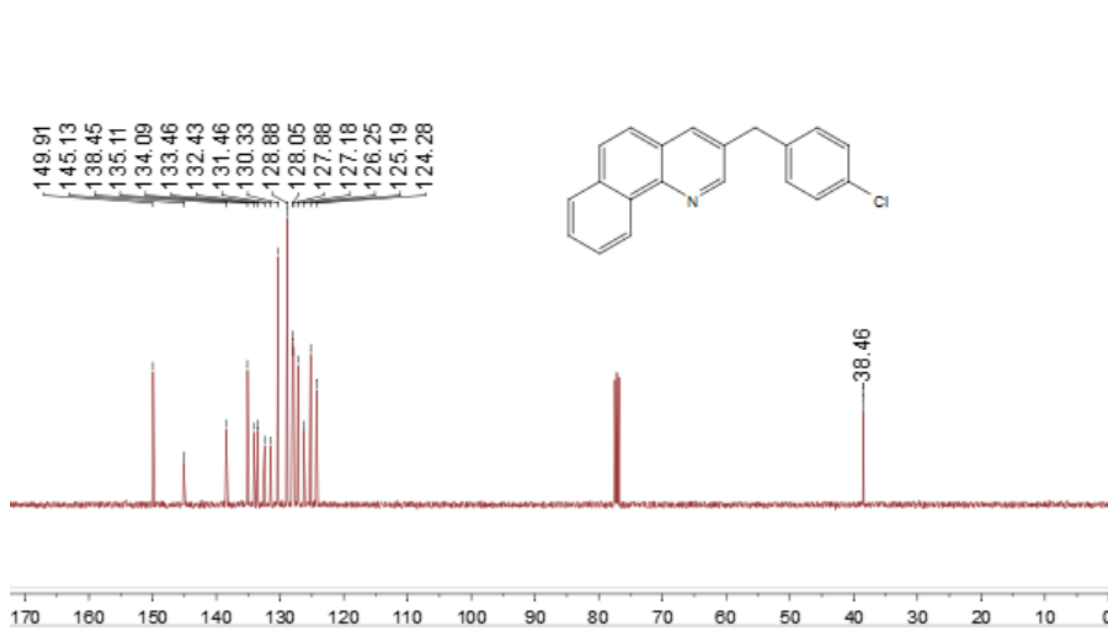

<sup>1</sup>H-NMR spectrum of 4-(benzo[h]quinolin-3-ylmethyl)-N,N-dimethylaniline (3fj)

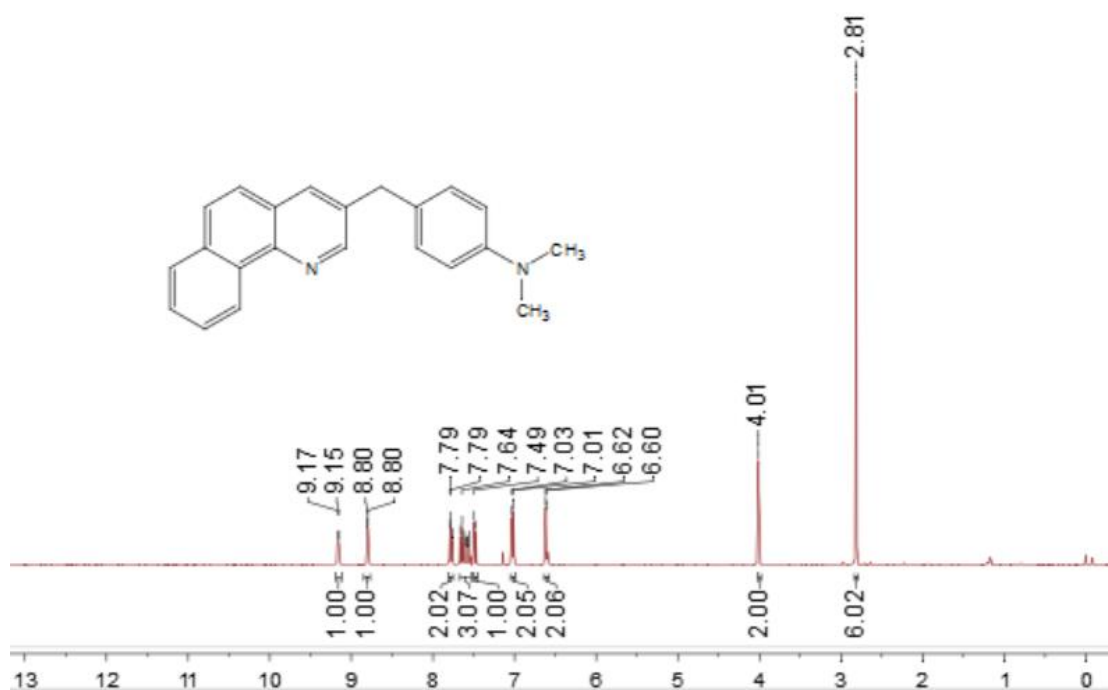

<sup>13</sup>C-NMR spectrum of 4-(benzo[h]quinolin-3-ylmethyl)-N,N-dimethylaniline (3fj)

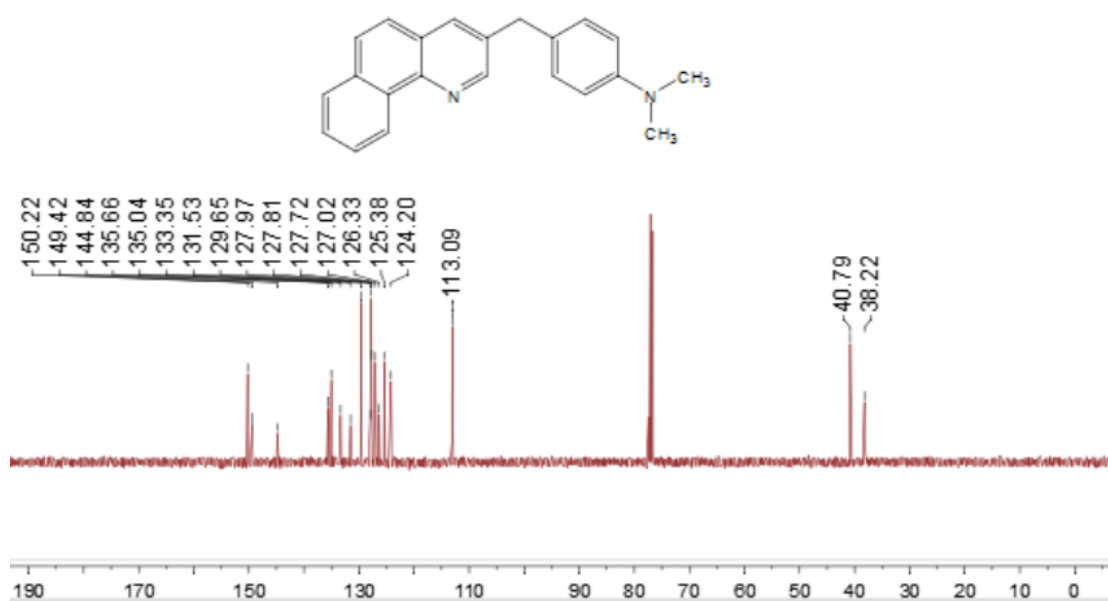



<sup>1</sup>H-NMR spectrum of 4-benzylisoquinoline (3ga)

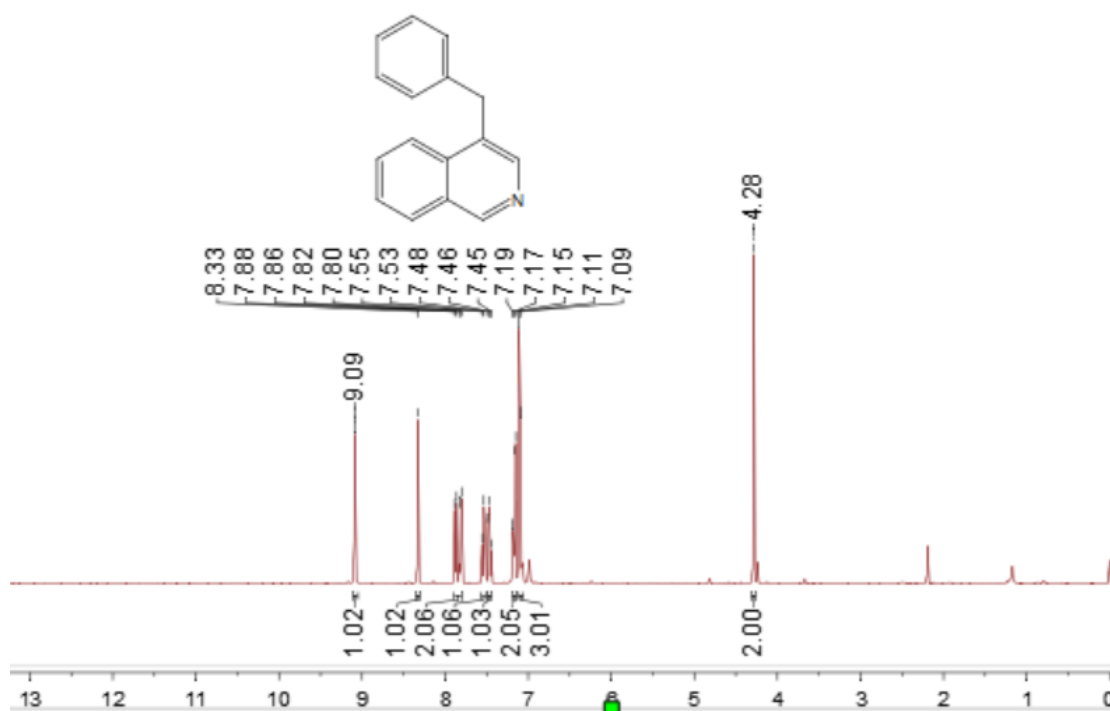

<sup>13</sup>C-NMR spectrum of 4-benzylisoquinoline (3ga)

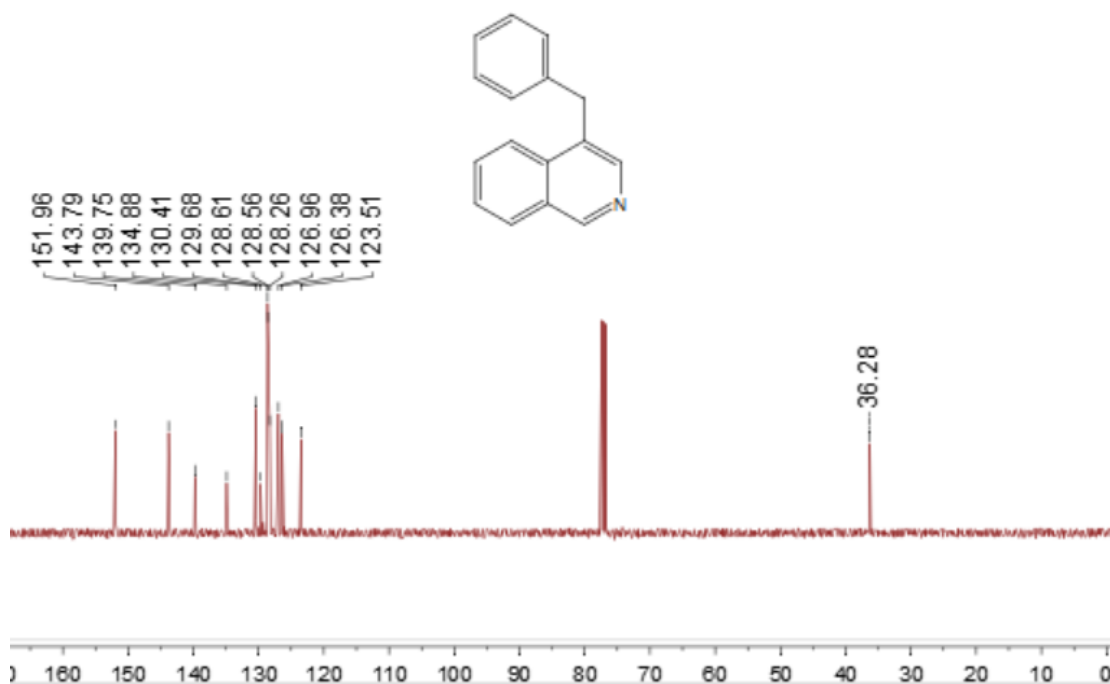

<sup>1</sup>H-NMR spectrum of 4-(4-chlorobenzyl)isoquinoline (3gb)

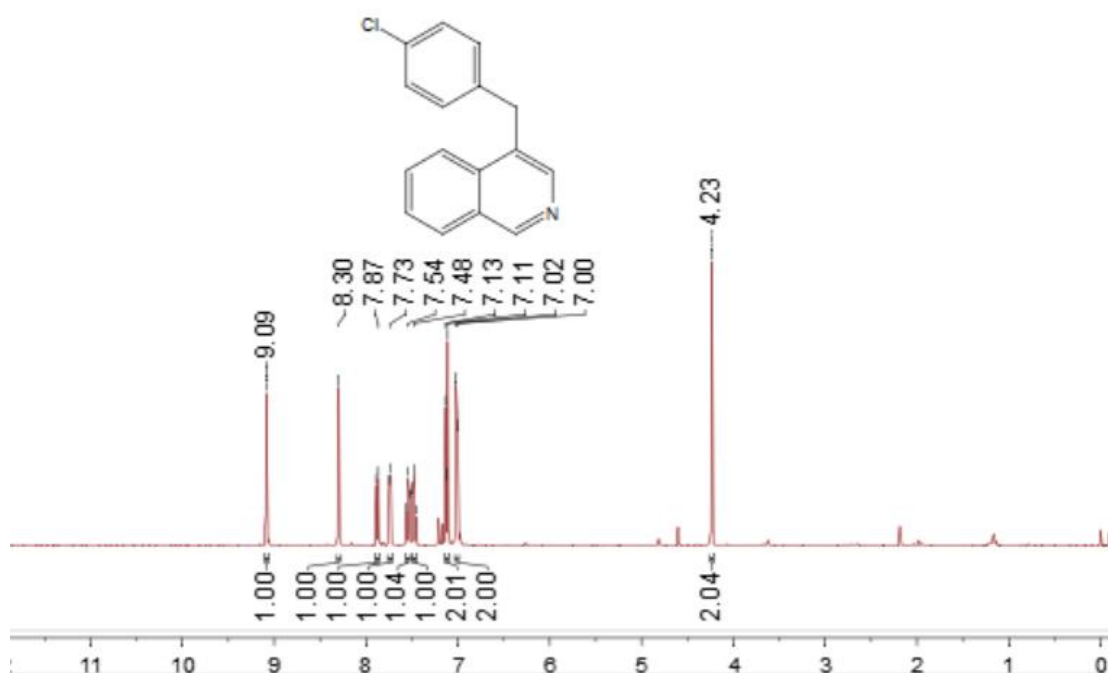

<sup>13</sup>C-NMR spectrum of 4-(4-chlorobenzyl)isoquinoline (3gb)

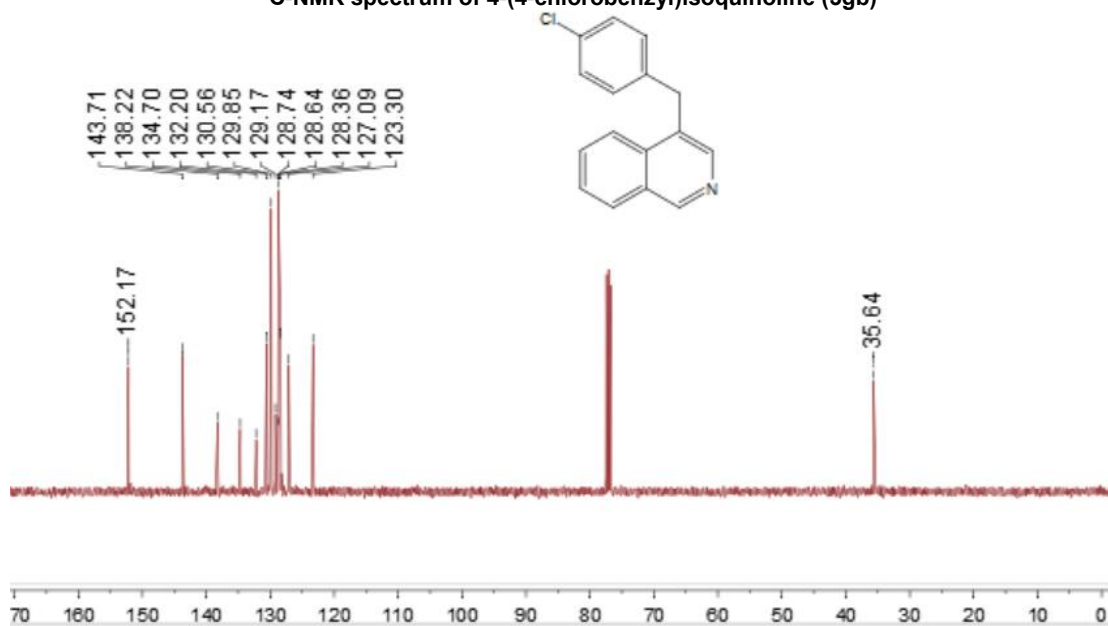

<sup>1</sup>H-NMR spectrum of 4-(4-methylbenzyl)isoquinoline (3gf)

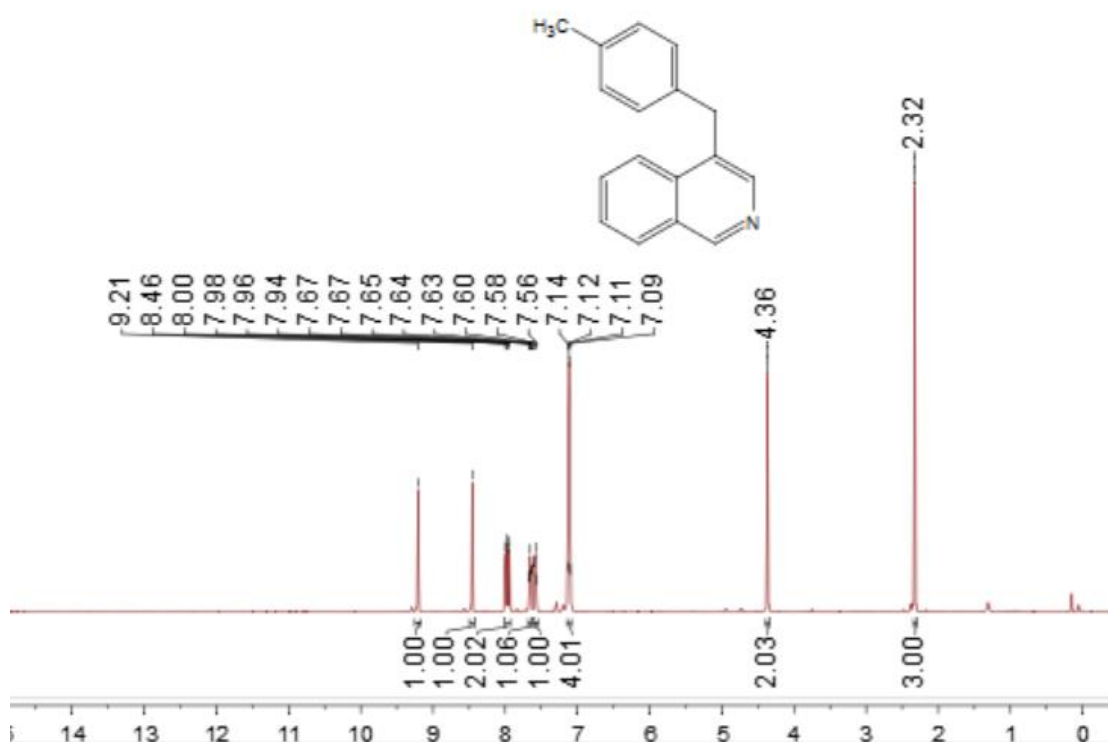

<sup>13</sup>C-NMR spectrum of 4-(4-methylbenzyl)isoquinoline (3gf)

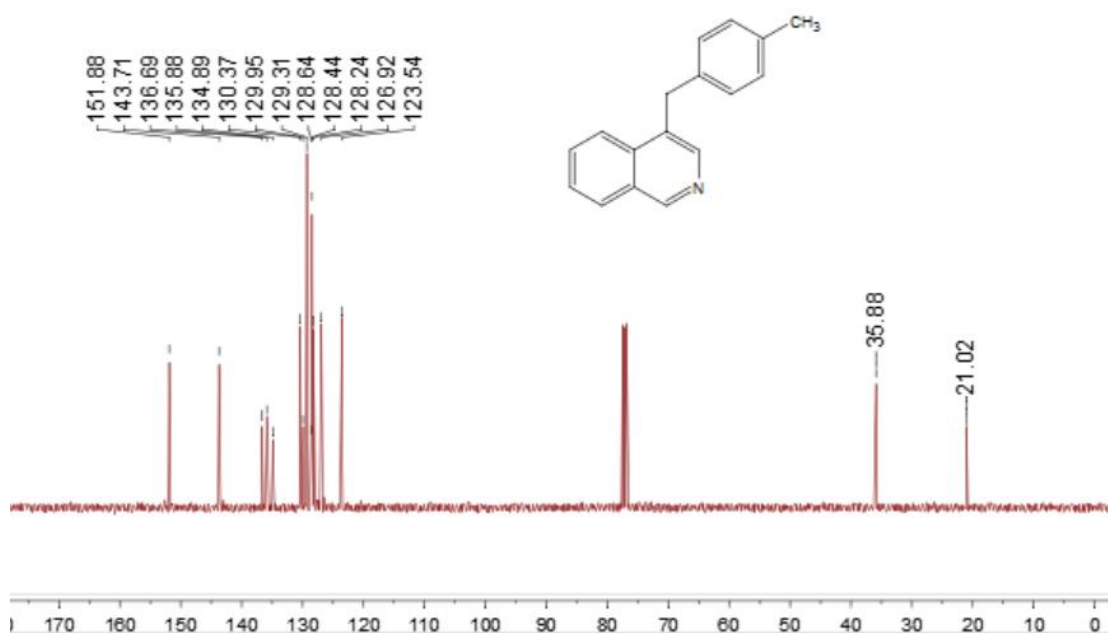

<sup>1</sup>H-NMR spectrum of 8-chloro-4-(4-methylbenzyl)isoquinoline (3hf)

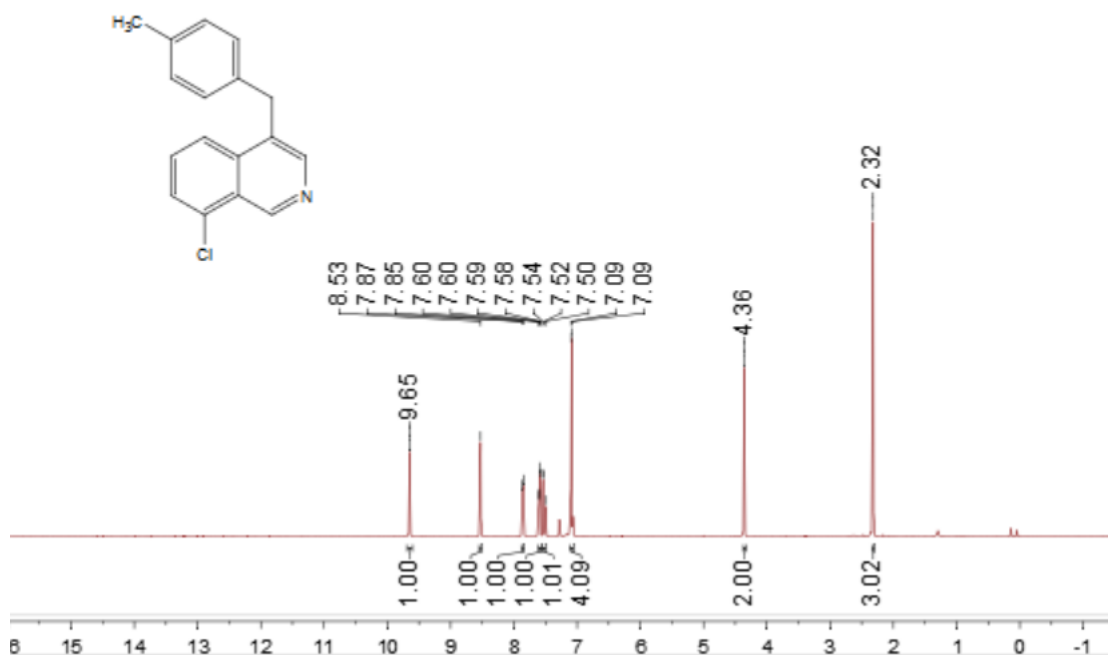

<sup>13</sup>C-NMR spectrum of 8-chloro-4-(4-methylbenzyl)isoquinoline (3hf)

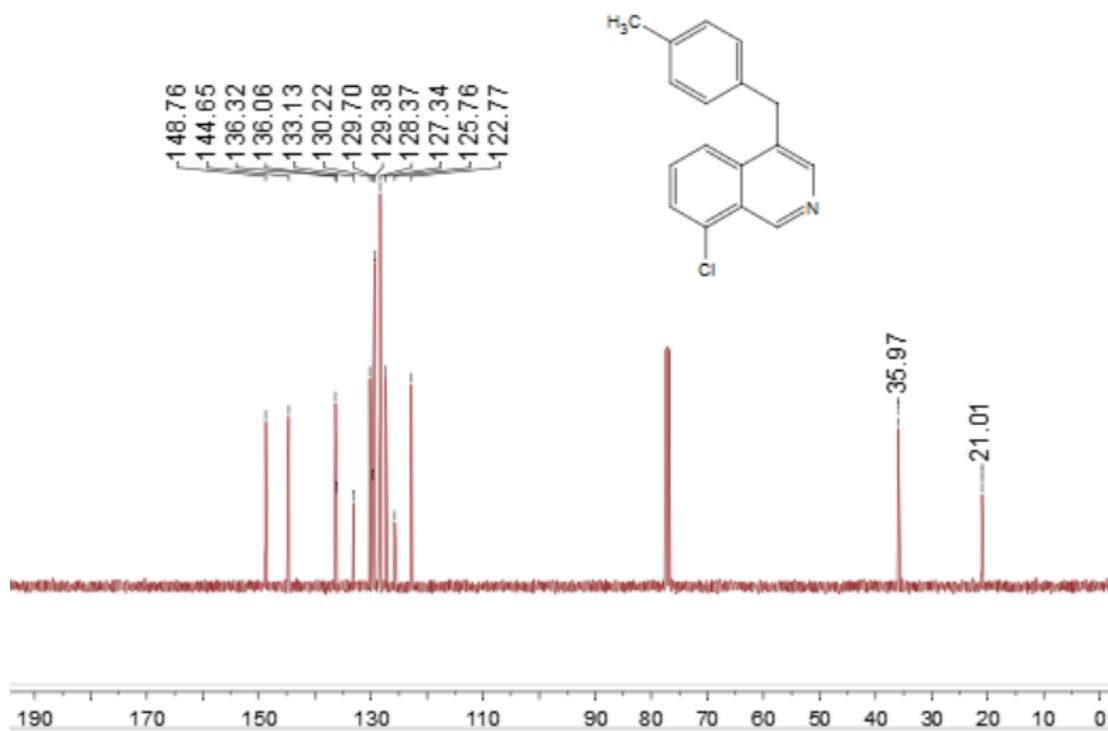

Supplement: Supplementary file 1 [file 8701939]
